# Supplementary material for: Branching principles of animal and plant networks identified by combining extensive data, machine learning and modelling
Source: J R Soc Interface. 2021 Jan 6;18(174):20200624. doi: 10.1098/rsif.2020.0624 (PMC7879751; doi:10.1098/rsif.2020.0624)
Supplement: Supplementary Material: R Code [file rsif20200624supp4.R]

####################    master_R_code.R       This script contains all sub-R scripts used to perform the analyses found in the affiliated manuscript.  Originally, each file was a separate script, but for uploadin purposes these files were merged into on.  Locations of new files will be identified by 20 pound signs followed by the original file name.


####################    auto_contour_count_kde.R

#### This code automates the task of identifying contour regions within the output from a local KDE test and counts the number of correctly and incorrectly identified data points within each contour for the two different distributions being compared.

## Use ks package to perform KDE analyses.
library(ks)
## Use MASS package for producing fake bivariate normal data.
library(MASS)
## Use the spatstat package for converting loc.test output into spatial data set of class "owin".
library(spatstat)

## Below is sample code to work with

######### First code to generate sample distributions. #########

N <- 5000 # Number of random samples
# set.seed(123)

# Target parameters for univariate normal distributions. rho determines correlation between marginalized x and y axes, ranges from -1 to 1. mus are marginalized means, s's are marginalized variances.

translate <- 0.6

rho1 <- 0

mu11 <- 0
mu12 <- 0
mu1 <- c(mu11,mu12) # Mean

mu21 <- -1
mu22 <- -1
mu2 <- c(mu21, mu22)

mu31 <- -1
mu32 <- 1
mu3 <- c(mu31, mu32)

mu41 <- 1
mu42 <- -1
mu4 <- c(mu41, mu42)

mu51 <- 1
mu52 <- 1
mu5 <- c(mu51, mu52)

s11 <- 1
s12 <- 1
sigma1 <- matrix(c(s11^2, s11*s12*rho1, s11*s12*rho1, s12^2), 2) # Covariance matrix


# Parameters for bivariate normal distribution. mu is vector of means, sigma is covariance matrix where diagonal elements are marginalized variances and off-diagonals are mixing/correlation terms.

bvn1 <- mvrnorm(N, mu = mu1, Sigma = sigma1) # from MASS package
colnames(bvn1) <- c("bvn1_X1","bvn1_X2")

# bvn2 <- rbind(mvrnorm(0.5*N, mu = mu1, Sigma = sigma1), mvrnorm(0.1*N, mu = mu1, Sigma = (1/16)*sigma1), mvrnorm(0.1*N, mu = mu2, Sigma = (1/16)*sigma1), mvrnorm(0.1*N, mu = mu3, Sigma = (1/16)*sigma1), mvrnorm(0.1*N, mu = mu4, Sigma = (1/16)*sigma1), mvrnorm(0.1*N, mu = mu5, Sigma = (1/16)*sigma1)) # from MASS package
colnames(bvn2) <- c("bvn2_X1","bvn2_X2")

## Toggle the following line of code on and off for analyzing two normal distributions.
# bvn2 <- mvrnorm(N, mu = c(mu1[1] + translate, mu1[2]), Sigma = sigma1)

bvn2 <- mvrnorm(N, mu = c(mu1[1], mu1[2]), Sigma = sigma1)

## Toggle the following code on and off for analyzing mammal/plant data

setwd("/Users/alexwork/odrive/Dropbox/Research/plant_animal_vasculature_comparison/methods_comparison/counting_contour_points_kde/point_count_graphs/mammal_plant/")


data <- read.csv(file = "ml_testing_data.csv")[,-1]
beta_dbeta_mammals <- data[which(data$group == "hht" | data$group == "ml"),c(1,2)]
beta_dbeta_plants <- data[which(data$group != "hht" & data$group != "ml"),c(1,2)]

bvn1 <- na.omit(data.frame(delta_beta = beta_dbeta_mammals[,2], beta = beta_dbeta_mammals[,1]))
bvn2 <- na.omit(data.frame(delta_beta = beta_dbeta_plants[,2], beta = beta_dbeta_plants[,1]))
#
# bvn1 <- na.omit(data.frame(delta_gamma = gamma_dgamma_mammals[,2], gamma = gamma_dgamma_mammals[,1]))
# bvn2 <- na.omit(data.frame(delta_gamma = gamma_dgamma_plants[,2], gamma = gamma_dgamma_plants[,1]))

xrange <- range(c(bvn1[,1], bvn2[,1]))
yrange <- range(c(bvn1[,2], bvn2[,2]))

## Use the floor and ceiling functions for the fake distributions
# xmin <- c(floor(xrange[1]), floor(yrange[1]))
# xmax <- c(ceiling(xrange[2]), ceiling(yrange[2]))

xmin <- c(xrange[1], yrange[1])
xmax <- c(xrange[2], yrange[2])

xrange <- c(xmin[1], xmax[1])
yrange <- c(xmin[2], xmax[2])

plot(bvn1, col = 'blue', xlim = xrange, ylim = yrange)
points(bvn2, col = 'red', xlim = xrange, ylim = yrange)


H1 <- Hpi(bvn1)
fhat_bvn1 <- kde(x = bvn1, H = H1, xmin = xmin, xmax = xmax)
H2 <- Hpi(bvn2)
fhat_bvn2 <- kde(x = bvn2, H = H2, xmin = xmin, xmax = xmax)

## Build inputs for kde.local.test as done in manuscript to begin reconstructing their results.

loc.test <- kde.local.test(x1 = bvn1, x2 = bvn2, H1 = H1, H2 = H2, fhat1 = fhat_bvn1, fhat2 = fhat_bvn2, signif.level = 0.05)

plot(loc.test)
points(bvn1)

plot(loc.test)
points(bvn2)


classy_point_counter <- function(bvn1, bvn2, kde_local_test, make_plot = FALSE, plotname){
    ###### Here we identify classified/misclassified points. ########
    
    ## This approach extracts the coordinates of the significance regions and converts them to a raster-like object of class "owin" (think pixels).  We can then idenfity which pixel coordinates are nearest neighbors to the distribution coordinates.  After having idenfitied the indexed position of the pixel coordinates, we can search for the corresponding significance region associated with that position, thus classifying the distribution points.  This might seem roundabout, but it works for all types of open and closed contours.
    
    ## First build data frame of ordered pairs of grid points.  Match ordering indeces to those of row-column form in estimate matrix structure.  Note that estimate matrix is plotted after a positive pi/2 rotation, such that the first column of the estimate matrix spans the x-axis for constant y, for the lowest value of y.  That is, as we move down the rows, we move along the x-axis in the positive x direction.  As we move right along the columns, we are moving along the y-axis in the positive y direction.  Thus, in building the ordered pair eval point "vector" we start with fixed columns and move along the rows.
    
    # loc.test$fhat.diff.pos$estimate[which(loc.test$fhat.diff.pos$estimate == 1)]
    
    evalpoints_vec <- mat.or.vec(nrow(loc.test$fhat.diff.pos$estimate)*ncol(loc.test$fhat.diff.pos$estimate),2)
    index <- 1
    for(j in 1:ncol(loc.test$fhat.diff.pos$estimate)){
        for(i in 1:nrow(loc.test$fhat.diff.pos$estimate)){
            evalpoints_vec[index,1] <- loc.test$fhat.diff.pos$eval.points[[1]][i]
            evalpoints_vec[index,2] <- loc.test$fhat.diff.pos$eval.points[[2]][j]
            index <- index + 1
        }
    }
    
    ## Use the following line to spot check results.  Coordinates should roughly match with what can be seen in a graph of the estimate matrix.
    # evalpoints_vec[which(loc.test$fhat.diff.pos$estimate == 1),]
    
    
    ## Now we will attempt to idenfity the nearest grid point to a given data point using spatstat functions.  Must first convert the binary entires in estimate matrix to logicals.
    
    ## To best match owin range and grids with eval.points range and grids...
    Nsteps <- nrow(loc.test$fhat.diff.pos$estimate)
    xrange_mod <- (xrange[2] - xrange[1])/(2*Nsteps)
    yrange_mod <- (yrange[2] - yrange[1])/(2*Nsteps)
    
    
    group1_pixels <- owin(xrange = c(xrange[1] - xrange_mod, xrange[2] + xrange_mod), yrange = c(yrange[1] - yrange_mod, yrange[2] + yrange_mod), mask = t(matrix(as.logical(loc.test$fhat.diff.pos$estimate), Nsteps, Nsteps)))
    
    group2_pixels <- owin(xrange = c(xrange[1] - xrange_mod, xrange[2] + xrange_mod), yrange = c(yrange[1] - yrange_mod, yrange[2] + yrange_mod), mask = t(matrix(as.logical(loc.test$fhat.diff.neg$estimate), Nsteps, Nsteps)))
    
    # plot(group1_pixels)
    # plot(group2_pixels)
    
    ## Here we will initialize our group classifier index vectors.
    
    group1_classified <- c()
    group1_misclassified <- c()
    group1_unclassified <- c()
    
    for(i in 1:nrow(bvn1)){
        ## Note that nearest.raster.point and owin objects apparently treat x coordinates as columns and y coordinates as rows.
        grid_x <- loc.test$fhat.diff.pos$eval.points[[1]][nearest.raster.point(x = bvn1[i,1], y = bvn1[i,2], group1_pixels)$col]
        grid_y <- loc.test$fhat.diff.pos$eval.points[[2]][nearest.raster.point(x = bvn1[i,1], y = bvn1[i,2], group1_pixels)$row]
        point_classified_check <- which((evalpoints_vec[which(loc.test$fhat.diff.pos$estimate == 1),1] == grid_x) & (evalpoints_vec[which(loc.test$fhat.diff.pos$estimate == 1),2] == grid_y))
        point_misclassified_check <- which((evalpoints_vec[which(loc.test$fhat.diff.neg$estimate == 1),1] == grid_x) & (evalpoints_vec[which(loc.test$fhat.diff.neg$estimate == 1),2] == grid_y))
        
        if(length(point_classified_check) > 0){
            group1_classified[i] <- i
            group1_misclassified[i] <- NA
            group1_unclassified[i] <- NA
        } else if(length(point_misclassified_check) > 0){
            group1_classified[i] <- NA
            group1_misclassified[i] <- i
            group1_unclassified[i] <- NA
        } else {
            group1_classified[i] <- NA
            group1_misclassified[i] <- NA
            group1_unclassified[i] <- i
        }
    }
    
    group1_classified_points <- bvn1[group1_classified,]
    group1_misclassified_points <- bvn1[group1_misclassified,]
    group1_unclassified_points <- bvn1[group1_unclassified,]
    
    ## Commented out to modify output graphs to mimic those of Jocelyn's.
    
    # if(make_plot){
    #   png(filename = paste(paste("group1", plotname, sep = "_"), "png", sep = "."), width = 6, height = 4, units = "in", res = 300)
    #   plot(loc.test)
    #   points(group1_classified_points, pch = '+')
    #   points(group1_misclassified_points, pch = '-')
    #   points(group1_unclassified_points, pch = 'o')
    #   points(bvn1, pch = '.', col = 'red')
    #   dev.off()
    # }
    
    
    ## Make the group2 version look like the group1 version
    
    group2_classified <- c()
    group2_misclassified <- c()
    group2_unclassified <- c()
    
    for(i in 1:nrow(bvn1)){
        grid_x <- loc.test$fhat.diff.neg$eval.points[[1]][nearest.raster.point(x = bvn2[i,1], y = bvn2[i,2], group2_pixels)$col]
        grid_y <- loc.test$fhat.diff.neg$eval.points[[2]][nearest.raster.point(x = bvn2[i,1], y = bvn2[i,2], group2_pixels)$row]
        point_classified_check <- which((evalpoints_vec[which(loc.test$fhat.diff.neg$estimate == 1),1] == grid_x) & (evalpoints_vec[which(loc.test$fhat.diff.neg$estimate == 1),2] == grid_y))
        point_misclassified_check <- which((evalpoints_vec[which(loc.test$fhat.diff.pos$estimate == 1),1] == grid_x) & (evalpoints_vec[which(loc.test$fhat.diff.pos$estimate == 1),2] == grid_y))
        
        if(length(point_classified_check) > 0){
            group2_classified[i] <- i
            group2_misclassified[i] <- NA
            group2_unclassified[i] <- NA
        } else if(length(point_misclassified_check) > 0){
            group2_classified[i] <- NA
            group2_misclassified[i] <- i
            group2_unclassified[i] <- NA
        } else {
            group2_classified[i] <- NA
            group2_misclassified[i] <- NA
            group2_unclassified[i] <- i
        }
    }
    
    group2_classified_points <- bvn2[group2_classified,]
    group2_misclassified_points <- bvn2[group2_misclassified,]
    group2_unclassified_points <- bvn2[group2_unclassified,]
    
    ## Commented out and modified below to mimic output of Jocelyn's graphs.
    
    # if(make_plot){
    #   png(filename = paste(paste("group2", plotname, sep = "_"), "png", sep = "."), width = 6, height = 4, units = "in", res = 300)
    #   plot(loc.test)
    #   points(group2_classified_points, pch = '+')
    #   points(group2_misclassified_points, pch = '-')
    #   points(group2_unclassified_points, pch = 'o')
    #   points(bvn2, pch = '.', col = 'red')
    #   dev.off()
    # }
    
    if(make_plot){
        
        points.dash <- function(x, y=x, len=0.01, ...){
            x.nfc <- grconvertX(x, from="user", to="nfc")
            start.x <- grconvertX(x.nfc - (len/2), from="nfc", to="user")
            end.x <- grconvertX(x.nfc + (len/2), from="nfc", to="user")
            segments(x0 = start.x, y0 = y, x1 = end.x, y1 = y, lty=1, ...)
        }
        
        png(filename = paste(paste("kde_contour", plotname, sep = "_"), "png", sep = "."), width = 15, height = 10, units = "in", res = 300)
        par(mar = c(4.1, 4.1, 4.1, 4.1))
        plot.new()
        plot.window(xlim=c(-0.4625, 0.4625), ylim=c(0.0625, 1.4625))
        box()
        # grid(nx = NULL, ny = NULL)
        abline(h = seq(0, 1.4, by = 0.2), v = seq(-0.4, 0.4, by = 0.2), col = "gray", lty = 1)
        par(xaxt = "n", yaxt = "n")
        plot(loc.test, xlab = "", ylab = "", add = TRUE, add.legend = FALSE, col = c('#73069b', '#315b03'))
        # legend("bottomleft", legend = c("Mammal", "Plant"), fill = c('#73069b', '#315b03'), cex = 3, title = "Classification")
        legend("bottomleft", legend = c("Correct", "Incorrect", "Unclassified"), pch = c(rep(NA, 3)), title = "Classification", cex = 3)
        
        xtick <- seq(-0.4, 0.4, by = 0.2)
        xticklab <- c(expression(-"0.4"), expression(-"0.2"), "0.0", "0.2", "0.4")
        axis(side = 1, at = xtick, labels = FALSE)
        text(x = xtick, par("usr")[3], labels = xticklab, srt = 0, pos = 1, xpd = TRUE, cex = 3)
        ytick <- seq(0., 1.4, by = 0.2)
        yticklab <- c("0.0", "0.2", "0.4", "0.6", "0.8", "1.0", "1.2", "1.4")
        text(y = ytick, par("usr")[1], labels = yticklab, srt = 0, pos = 2, xpd = TRUE, cex = 3)
        points(rbind(bvn1, bvn2), pch = 1, col = 'black', cex = 3.5, lwd = 1)
        points(rbind(group1_classified_points, group2_classified_points), pch = '+', col = 'black', cex = 3)
        points.dash(x = rbind(group1_misclassified_points, group2_misclassified_points)[,1], y = rbind(group1_misclassified_points, group2_misclassified_points)[,2], len = 0.015, lwd = 4, col = 'red')
        #points(rbind(group1_unclassified_points, group2_unclassified_points), pch = 15, col = 'red', cex = 0.75)
        dev.off()
    }
    
    group1_class_vec <- mat.or.vec(length(group1_classified),1)
    group1_class_vec[group1_classified] <- "correct"
    group1_class_vec[group1_misclassified] <- "incorrect"
    group1_class_vec[group1_unclassified] <- "unclassified"
    group1_class_vec <- as.factor(group1_class_vec)
    
    group2_class_vec <- mat.or.vec(length(group2_classified),1)
    group2_class_vec[group2_classified] <- "correct"
    group2_class_vec[group2_misclassified] <- "incorrect"
    group2_class_vec[group2_unclassified] <- "unclassified"
    group2_class_vec <- as.factor(group2_class_vec)
    
    correct_bvn1 <- sum(!is.na(group1_classified))
    incorrect_bvn1 <- sum(!is.na(group1_misclassified))
    
    correct_bvn2 <- sum(!is.na(group2_classified))
    incorrect_bvn2 <- sum(!is.na(group2_misclassified))
    
    scores_signif_absolute <- matrix(data = c(correct_bvn1, incorrect_bvn2, sum(correct_bvn1, incorrect_bvn2), incorrect_bvn1, correct_bvn2, sum(incorrect_bvn1, correct_bvn2), sum(correct_bvn1, incorrect_bvn1), sum(correct_bvn2, incorrect_bvn2), sum(correct_bvn1, incorrect_bvn2, incorrect_bvn1, correct_bvn2)), nrow = 3, ncol = 3, byrow = T, dimnames = list(c("bvn1_pred", "bvn2_pred", "total_act"), c("bvn1_act", "bvn2_act", "total_pred")))
    scores_signif_relative <- matrix(data = c(100*correct_bvn1/sum(correct_bvn1, incorrect_bvn2), 100*incorrect_bvn2/sum(correct_bvn1, incorrect_bvn2), sum(correct_bvn1, incorrect_bvn2), 100*incorrect_bvn1/sum(incorrect_bvn1, correct_bvn2), 100*correct_bvn2/sum(incorrect_bvn1, correct_bvn2), sum(incorrect_bvn1, correct_bvn2), sum(correct_bvn1, incorrect_bvn1), sum(correct_bvn2, incorrect_bvn2), sum(correct_bvn1, incorrect_bvn2, incorrect_bvn1, correct_bvn2)), nrow = 3, ncol = 3, byrow = T, dimnames = list(c("bvn1_pred", "bvn2_pred", "total_act"), c("bvn1_act", "bvn2_act", "total_pred")))
    
    
    # return(list(data.frame(bvn1, group1_class_vec), data.frame(bvn2, group2_class_vec), scores_signif_absolute))
    return(scores_signif_absolute)
}


setwd("/Users/alexwork/Desktop/")

loc.test <- kde.local.test(x1 = bvn1, x2 = bvn2, H1 = H1, H2 = H2, fhat1 = fhat_bvn1, fhat2 = fhat_bvn2, signif.level = 0.05)
classy_point_counter(bvn1, bvn2, loc.test, make_plot = TRUE, plotname = paste("sig_order", "test", sep = "_"))


## Here is older code used to plot percent of grid space calculated as significant vs defined significance level.
sig_vec <- seq(-22,8, by = 2)/2
prediction_tables <- list()
group1_percent_correct <- c()
group1_percent_incorrect <- c()
group2_percent_correct <- c()
group2_percent_incorrect <- c()

for(i in 1:length(sig_vec)){
    loc.test <- kde.local.test(x1 = bvn1, x2 = bvn2, H1 = H1, H2 = H2, fhat1 = fhat_bvn1, fhat2 = fhat_bvn2, signif.level = 1*10^(sig_vec[i]))
    
    if(i < 10){
        count <- paste("0", i, sep = "")
    }else if(i > 10){
        count <- as.character(i)
    }
    
    prediction_tables[[i]] <- classy_point_counter(bvn1, bvn2, loc.test, make_plot = TRUE, plotname = paste(count, paste("sig_order", round(sig_vec[i],2), sep = "_"), sep = "_"))
    group1_percent_correct[i] <- 100*prediction_tables[[i]][1,1]/prediction_tables[[i]][1,3]
    group1_percent_incorrect[i] <- 100*prediction_tables[[i]][1,2]/prediction_tables[[i]][1,3]
    group2_percent_correct[i] <- 100*prediction_tables[[i]][2,2]/prediction_tables[[i]][2,3]
    group2_percent_incorrect[i] <- 100*prediction_tables[[i]][2,1]/prediction_tables[[i]][2,3]
}

group1_percent_correct_labels_vec <- c()
group1_percent_incorrect_labels_vec <- c()
group2_percent_correct_labels_vec <- c()
group2_percent_incorrect_labels_vec <- c()

for(i in 1:length(sig_vec)){
    group1_percent_correct_labels_vec[i] <- sprintf("%i/%i", prediction_tables[[i]][1,1], prediction_tables[[i]][1,3])
    group1_percent_incorrect_labels_vec[i] <- sprintf("%i/%i", prediction_tables[[i]][1,2], prediction_tables[[i]][1,3])
    group2_percent_correct_labels_vec[i] <- sprintf("%i/%i", prediction_tables[[i]][2,2], prediction_tables[[i]][2,3])
    group2_percent_incorrect_labels_vec[i] <- sprintf("%i/%i", prediction_tables[[i]][2,1], prediction_tables[[i]][2,3])
}

plot(sig_vec, group1_percent_correct, xlab = "Significance Level (log-scale)", ylab = "(Mis)Classification Percent", main = "(Mis)Classification vs. User-defined signifiance Level, \n Normal-Normal Identical Distributions", pch = "+", col = "blue", ylim = c(0, 100))
points(sig_vec, group1_percent_incorrect, pch = "-", col = "blue")
points(sig_vec, group2_percent_correct, pch = "+", col ="red")
points(sig_vec, group2_percent_incorrect, pch = "-", col = "red")
text(sig_vec, group1_percent_correct + 3, labels = group1_percent_correct_labels_vec, cex = 0.625, col = "blue")
text(sig_vec, group1_percent_incorrect - 3, labels = group1_percent_incorrect_labels_vec, cex = 0.625, col = "blue")
text(sig_vec, group2_percent_correct - 5, labels = group2_percent_correct_labels_vec, cex = 0.625, col = "red")
text(sig_vec, group2_percent_incorrect + 5, labels = group2_percent_incorrect_labels_vec, cex = 0.625, col = "red")
abline(v = log10(0.05), lty = 2)
legend(x = 0, y = 70, legend = c("Correctly Classified as Group 1", "Incorrectly Classified as Group 1", "Correctly Classified as Group 2", "Incorrectly Classified as Group 2"), pch = c("+", "-", "+", "-"), col = c("blue", "blue", "red", "red"), bty = 'n')

for(i in 1:length(prediction_tables)){
    print(prediction_tables[i])
    write.csv(x = prediction_tables[i], file = paste(paste("mammal_plant_prediction_table_sig_order", round(sig_vec[i],2), sep = "_"), ".csv", sep = ""))
}


####################    auto_contour_count_ml.R

## This script is to read in Jocelyn's machine learning output, bin the scores, then produce graphs comparing the methods.


# Set working directory to location of datafiles.
setwd("/Users/alexwork/odrive/Dropbox/Research/plant_animal_vasculature_comparison/jocelyn_ml_output_042018")
dir()

# Read in datafiles.
svm_radial <- read.csv(file = "beta_ave_beta_diff_SVM.csv", header = TRUE)
svm_length <- read.csv(file = "gamma_ave_gamma_diff_SVM.csv", header = TRUE)
logreg_radial <- read.csv(file = "beta_ave_beta_diff_LogReg.csv", header = TRUE)
logreg_length <- read.csv(file = "gamma_ave_gamma_diff_LogReg.csv", header = TRUE)

# Take a quick look at distributions of scores.
hist(svm_radial$probabilities, xlim = c(0, 1), breaks = 20)
hist(svm_length$probabilities, xlim = c(0, 1), breaks = 20)
hist(logreg_radial$probabilities, xlim = c(0,1), breaks = 20)
hist(logreg_length$probabilities, xlim = c(0,1), breaks = 20)

# Practice binning scores and counting for correct/incorrect identification.  Need to build a function that runs on a variable bin size/number and can be used on any of the outputs that Jocelyn produces.


##### FUNCTION HEADER CAN GO HERE

## Let's start with 10 bins, which means 11 fence-posts.

testdf <- svm_length

group1_bins <- seq(from = 1, to = 0.5, length.out = 11)
# Reverse group2_bins with respect to group1_bins so that the same index corresponds to relatively the same threshold.
group2_bins <- seq(from = 0.0, to = 0.5, length.out = 11)


## Note that the language we are using, correct group1 is for correctly identified mammals, and correct group2 is for correctly identified plants.  Also, with Jocelyn's coding, zeros are mammals and ones are plants, and points with scores > 0.5 are labelled zeros, while points with scores < 0.5 are labelled ones.
classified_correct_group1 <- c()
classified_incorrect_group1 <- c()
classified_correct_group2 <- c()
classified_incorrect_group2 <- c()

for(i in 1:(length(group1_bins) - 1)){
    ## Note that we are taking advantage of the fact that no probability scores of zero are reported, thus we can get away with using a strictly greater than sign on the lower end of the bin counting.
    group1_class <- which((testdf$probabilities <= group1_bins[i]) & (testdf$probabilities > group1_bins[i+1]))
    group2_class <- which((testdf$probabilities > group2_bins[i]) & (testdf$probabilities <= group2_bins[i+1]))
    
    
    group1_class_correct <- length(which(testdf[group1_class,]$type == 0))
    group1_class_incorrect <- length(which(testdf[group1_class,]$type == 1))
    group2_class_correct <- length(which(testdf[group2_class,]$type == 1))
    group2_class_incorrect <- length(which(testdf[group2_class,]$type == 0))
    
    
    classified_correct_group1[i] <- group1_class_correct
    classified_incorrect_group1[i] <- group1_class_incorrect
    classified_correct_group2[i] <- group2_class_correct
    classified_incorrect_group2[i] <- group2_class_incorrect
}

classified_correct_group1 <- cumsum(classified_correct_group1)
classified_incorrect_group1 <- cumsum(classified_incorrect_group1)
classified_correct_group2 <- cumsum(classified_correct_group2)
classified_incorrect_group2 <- cumsum(classified_incorrect_group2)

sig_vec <- seq(50, 95, length.out = 10)
group1_percent_correct <- c()
group1_percent_incorrect <- c()
group2_percent_correct <- c()
group2_percent_incorrect <- c()

for(i in 1:length(sig_vec)){
    if(sum(classified_correct_group1[i], classified_incorrect_group1[i]) > 0){
        group1_percent_correct[i] <- 100*classified_correct_group1[i]/sum(classified_correct_group1[i], classified_incorrect_group1[i])
    }
    else {
        group1_percent_correct[i] <- NA
    }
    if(sum(classified_correct_group1[i], classified_incorrect_group1[i])){
        group1_percent_incorrect[i] <- 100*classified_incorrect_group1[i]/sum(classified_correct_group1[i], classified_incorrect_group1[i])
    }
    else {
        group1_percent_incorrect[i] <- NA
    }
    if(sum(classified_correct_group2[i], classified_incorrect_group2[i])){
        group2_percent_correct[i] <- 100*classified_correct_group2[i]/sum(classified_correct_group2[i], classified_incorrect_group2[i])
    }
    else {
        group2_percent_correct[i] <- NA
    }
    if(sum(classified_correct_group2[i], classified_incorrect_group2[i])){
        group2_percent_incorrect[i] <- 100*classified_incorrect_group2[i]/sum(classified_correct_group2[i], classified_incorrect_group2[i])
    }
    else {
        group2_percent_incorrect[i] <- NA
    }
}

group1_percent_correct_labels_vec <- c()
group1_percent_incorrect_labels_vec <- c()
group2_percent_correct_labels_vec <- c()
group2_percent_incorrect_labels_vec <- c()

for(i in 1:length(sig_vec)){
    group1_percent_correct_labels_vec[i] <- sprintf("%i/%i", classified_correct_group1[i], sum(classified_correct_group1[i], classified_incorrect_group1[i]))
    group1_percent_incorrect_labels_vec[i] <- sprintf("%i/%i", classified_incorrect_group1[i], sum(classified_correct_group1[i], classified_incorrect_group1[i]))
    group2_percent_correct_labels_vec[i] <- sprintf("%i/%i", classified_correct_group2[i], sum(classified_correct_group2[i], classified_incorrect_group2[i]))
    group2_percent_incorrect_labels_vec[i] <- sprintf("%i/%i", classified_incorrect_group2[i], sum(classified_correct_group2[i], classified_incorrect_group2[i]))
}

plot(rev(sig_vec), group1_percent_correct, xlab = "Score", ylab = "(Mis)Classification Percent", main = "(Mis)Classification vs. SVM Score, \n Mammal-Plant Length Scale Factor Distributions", pch = "+", col = "blue", ylim = c(0, 110), xlim = c(100, 50))
points(rev(sig_vec), group1_percent_incorrect, pch = "-", col = "blue")
points(rev(sig_vec), group2_percent_correct, pch = "+", col ="red")
points(rev(sig_vec), group2_percent_incorrect, pch = "-", col = "red")
text(rev(sig_vec), group1_percent_correct + 3, labels = group1_percent_correct_labels_vec, cex = 0.625, col = "blue")
text(rev(sig_vec), group1_percent_incorrect - 3, labels = group1_percent_incorrect_labels_vec, cex = 0.625, col = "blue")
text(rev(sig_vec), group2_percent_correct - 5, labels = group2_percent_correct_labels_vec, cex = 0.625, col = "red")
text(rev(sig_vec), group2_percent_incorrect + 5, labels = group2_percent_incorrect_labels_vec, cex = 0.625, col = "red")
# abline(v = log10(0.05), lty = 2)
legend(x = 100, y = 70, legend = c("Correctly Classified as Mammal", "Incorrectly Classified as Mammal", "Correctly Classified as Plant", "Incorrectly Classified as Plant"), pch = c("+", "-", "+", "-"), col = c("blue", "blue", "red", "red"), bty = 'n')

setwd("/Users/alexwork/odrive/Dropbox/Research/plant_animal_vasculature_comparison/counting_contour_points_ml")


####################    curvature_graphs.R

### In this worksheet we explore the source of curvature sign flipping in the curvature of metaoblic scaling.  We have two expressions to examine.  The compact form (see page II of your notes) and the expanded form (see page IV of your notes).

## Here we explore some of the structure of the expanded form.  The expanded form can be expressed in terms of two functions, lf1 and lf2.  Note that lf1 is always positive, where as lf2 is always negative.  Both asymptote to zero for x near/greater than 2, and asymptote toward +/- infinity for x near zero.


lf1 <- function(x, N){
    return(log((1 - x**(N+1))/(x**N - x**(N+1))))
}

lf2 <- function(x, N){
    return(log(x)/(1 - x**(N+1)))
}


lf1(0.8, 5)
log(1.2)
log(0.8)

lf2(1, 5)

curve(expr = lf1(x, 10), from = 0.2, to = 3, n = 1000, ylim = c(1, 15))
curve(expr = lf1(x, 6), from = 0.2, to = 2, n = 1000, add = TRUE)
curve(expr = lf1(x, 2), from = 0.2, to = 2, n = 1000, add = TRUE)

curve(expr = lf2(x, 10), from = 0.2, to = 3, n = 1000)
curve(expr = lf2(x, 6), from = 0.2, to = 3, n = 1000, add = TRUE)
curve(expr = lf2(x, 2), from = 0.2, to = 3, n = 1000, add = TRUE)

# Try entering full form of expanded function.  Rewrite first in terms of all terms contributing to positive values (all but one) and all terms contributing to negative values (only one).


## Here we explore some of the structure of the compact form.  The compact form can be expressed in terms of three functions, lx1, dlx1, and dlx2.  That is, a generic function lx1, and the first two derivatives of that same function with respect to the variable N (not x!).  Add here comments on the signs of these functions.  Note that lx1 is always positive, dlx1 is always positive, and d2lx1 is always negative.  However, in d2lnB/dlnM2, d2lx1 shows up with a minus sign, and d1lx1 shows up with a minus sign.  Thus, all possible sign flipping will be contributed to the d1lx1 term.  Interestingly, this term increases in value with decreasing network size.

lx1 <- function(x, N){
    return(N*log(2) + log((1 - x**(N+1))/(x**N - x**(N+1))))
}

dlx1 <- function(x, N){
    return(log(2) - log(x)/(1 - x**(N+1)))
}

d2lx1 <- function(x, N){
    return(-x**(N+1)*log(x)**2/(1 - x**(N+1))**2)
}

curveBcomp <- function(x, N){
    return((2*lx1(x,N)**3 + 2*N**2*lx1(x,N)*(dlx1(x,N))**2 - N**2*lx1(x,N)**2*d2lx1(x,N) - 4*N*lx1(x,N)**2*dlx1(x,N))/lx1(x,N)**4)
}


xs <- seq(0.5, 3, by=0.001)
# "Theory"
ys <- seq(2, 22, by = 4)

# Comparing to data
ys <- c(1:6, 7, 8, 9, 10)

par(mfrow = c(2,2), mar = c(5.1, 4.1, 2.1, 2.1))
res1 <- mapply(lx1, list(xs), ys)
cols <- c("black", "blue", "orange", "red", "purple", "green")
matplot(xs, res1, col=cols, type="l", lty=1, lwd=2, xlab="vol scale factor", ylab="ln(Vtot)")

res2 <- mapply(dlx1, list(xs), ys)
matplot(xs, res2, col=cols, type="l", lty=1, lwd=2, xlab="vol scale factor", ylab="dln(Vtot)/dN")
legend(x = 1.25, y = 1.6, legend=ys, title="Number of Generations", lwd=2, col=cols, ncol = 3, cex = 1, bty = "n", seg.len = 1, x.intersp = 0.25, y.intersp = 0.75, text.width = 0.01)

res3 <- mapply(d2lx1, list(xs), ys)
matplot(xs, res3, col=cols, type="l", lty=1, lwd=2, xlab="vol scale factor", ylab="d^2ln(Vtot)/dN^2")

res4 <- mapply(curveBcomp, list(xs), ys)
matplot(xs, res4, col=cols, type="l", lty=1, lwd=2, xlab="vol scale factor", ylab="d^2lnB/dlnM^2")


## Here we will build point vectors out of the mse_funcmean_geom_tab values to map out where our data sits on these curves.  We will split by: AS Tips, GS Tips, Ponderosas, Balsa, Pinon, ML, HHT, Roots.  May merge together later.  also consider splitting data up in heatmaps by these groups as well...depending on how these plots turn out.


balsa_vol_fac <- mse_funcmean_geom_tab$asym_vol_fac[which(mse_funcmean_geom_tab$Species == "balsa")]
balsa_gen <- mse_funcmean_geom_tab$N[which(mse_funcmean_geom_tab$Species == "balsa")]
balsa_curve <- curveBcomp(balsa_vol_fac, balsa_gen)

pinon_vol_fac <- mse_funcmean_geom_tab$asym_vol_fac[which(mse_funcmean_geom_tab$Species == "pinon")]
pinon_gen <- mse_funcmean_geom_tab$N[which(mse_funcmean_geom_tab$Species == "pinon")]
pinon_curve <- curveBcomp(pinon_vol_fac, pinon_gen)

ML_vol_fac <- mse_funcmean_geom_tab$asym_vol_fac[which(mse_funcmean_geom_tab$Species == "mouse lung WT")]
ML_gen <- mse_funcmean_geom_tab$N[which(mse_funcmean_geom_tab$Species == "mouse lung WT")]
ML_curve <- curveBcomp(ML_vol_fac, ML_gen)

hht_vol_facs <- mse_funcmean_geom_tab$asym_vol_fac[which(mse_funcmean_geom_tab$Species == "hht")]
hht_gens <- mse_funcmean_geom_tab$N[which(mse_funcmean_geom_tab$Species == "hht")]
hht_curves <- curveBcomp(hht_vol_facs, hht_gens)

pond_vol_facs <- mse_funcmean_geom_tab$asym_vol_fac[which(mse_funcmean_geom_tab$Species == "ponderosa")]
pond_gens <- mse_funcmean_geom_tab$N[which(mse_funcmean_geom_tab$Species == "ponderosa")]
pond_curves <- curveBcomp(pond_vol_facs, pond_gens)

dougfir_vol_facs <- mse_funcmean_geom_tab$asym_vol_fac[which(mse_funcmean_geom_tab$Species == "dougfir")]
dougfir_gens <- mse_funcmean_geom_tab$N[which(mse_funcmean_geom_tab$Species == "dougfir")]
dougfir_curves <- curveBcomp(dougfir_vol_facs, dougfir_gens)

maple_vol_facs <- mse_funcmean_geom_tab$asym_vol_fac[which(mse_funcmean_geom_tab$Species == "maple")]
maple_gens <- mse_funcmean_geom_tab$N[which(mse_funcmean_geom_tab$Species == "maple")]
maple_curves <- curveBcomp(maple_vol_facs, maple_gens)

oak_vol_facs <- mse_funcmean_geom_tab$asym_vol_fac[which(mse_funcmean_geom_tab$Species == "oak")]
oak_gens <- mse_funcmean_geom_tab$N[which(mse_funcmean_geom_tab$Species == "oak")]
oak_curves <- curveBcomp(oak_vol_facs, oak_gens)

robinia_vol_facs <- mse_funcmean_geom_tab$asym_vol_fac[which(mse_funcmean_geom_tab$Species == "robinia")]
robinia_gens <- mse_funcmean_geom_tab$N[which(mse_funcmean_geom_tab$Species == "robinia")]
robinia_curves <- curveBcomp(robinia_vol_facs, robinia_gens)

whitefir_vol_facs <- mse_funcmean_geom_tab$asym_vol_fac[which(mse_funcmean_geom_tab$Species == "whitefir")]
whitefir_gens <- mse_funcmean_geom_tab$N[which(mse_funcmean_geom_tab$Species == "whitefir")]
whitefir_curves <- curveBcomp(whitefir_vol_facs, whitefir_gens)

whitepine_vol_facs <- mse_funcmean_geom_tab$asym_vol_fac[which(mse_funcmean_geom_tab$Species == "whitepine")]
whitepine_gens <- mse_funcmean_geom_tab$N[which(mse_funcmean_geom_tab$Species == "whitepine")]
whitepine_curves <- curveBcomp(whitepine_vol_facs, whitepine_gens)

astips_vol_facs <- c(oak_vol_facs, robinia_vol_facs, maple_vol_facs)
astips_curves <- c(oak_curves, robinia_curves, maple_curves)

gstips_vol_facs <- c(dougfir_vol_facs, whitepine_vol_facs, whitefir_vol_facs)
gstips_curves <- c(dougfir_curves, whitepine_curves, whitefir_curves)

roots_vol_facs <- mean(mse_funcmean_geom_tab$asym_vol_fac[which(mse_funcmean_geom_tab$Species == "root")])
roots_gens <- round(mean(mse_funcmean_geom_tab$N[which(mse_funcmean_geom_tab$Species == "root")]))
roots_curves <- curveBcomp(roots_vol_facs, roots_gens)

par(mfrow = c(1,1))
ys <- c(1:6, 8, 9, 10)
xs <- seq(0, 2, by=0.001)

res4 <- mapply(curveBcomp, list(xs), ys)

png(filename = "/Users/alexwork/Desktop/curvature.png", width = 4.5, height = 3.5, units = "in", res = 300)
matplot(xs, res4, col=cols, type="l", lty=1, lwd=1, xlab= "", ylab = "")
title(ylab = expression(paste("Curvature ", (d^2*lnB/dln*M^2))), xlab = expression(paste("Volume Scale Factor ", (nu))), line = 2.25)

points(x = c(balsa_vol_fac, pinon_vol_fac, ML_vol_fac, hht_vol_facs, pond_vol_facs, astips_vol_facs, gstips_vol_facs, roots_vol_facs), y = c(balsa_curve, pinon_curve, ML_curve, hht_curves, pond_curves, astips_curves, gstips_curves, roots_curves), pch = c(0,1,3, rep(4, 18), rep(5, 5), rep(2, 15), rep(6, 16), 7))

legend(x = 0.01, y = 0.2, legend=ys, title="Number of \n Generations", lwd=1, col=cols, ncol = 3, bty = "n", seg.len = 0.75, text.width = 0.01, x.intersp = 0.5, cex = 0.75, pt.cex = 1)
#, , y.intersp = 1.5,
dev.off()

### Here we try graphing curvature in terms of Vtot/V_0, where V_0 is the volume of the base branch (we ran the telescoping scale factor products to the base instead of the tips in order to eliminate the pathology of variation in tip size due to super linear scaling of branches).

lx2 <- function(x, N){
    return(log((1 - x**(N+1))/(1 - x)))
}

dlx2 <- function(x,N){
    return((-x**(N+1)*log(x))/(1-x**(N+1)))
}

d2lx2 <- function(x,N){
    return((-x**(N+1)*log(x)**2)/(1-x**(N+1))**2)
}

xs <- seq(0, 2, by=0.001)
# "Theory"
ys <- seq(6, 28, by = 4)

# Comparing to data
# ys <- c(1:6, 7, 8, 9, 10)

curveBcomp2 <- function(x, N){
    return((2*lx2(x,N)**3 + 2*N**2*lx2(x,N)*(dlx2(x,N))**2 - N**2*lx2(x,N)**2*d2lx2(x,N) - 4*N*lx2(x,N)**2*dlx2(x,N))/lx2(x,N)**4)
}


xs <- seq(0.1, 2, by=0.001)
# "Theory"
ys <- seq(2, 22, by = 2)

# Comparing to data
# ys <- c(1:6, 7, 8, 9, 10)

par(mfrow = c(2,2), mar = c(5.1, 4.1, 2.1, 2.1))
res1 <- mapply(lx2, list(xs), ys)
cols <- c("black", "blue", "orange", "red", "purple", "green")
matplot(xs, res1, col=cols, type="l", lty=1, lwd=2, xlab="vol scale factor", ylab="ln(Vtot)")
legend(x = 0, y = 25, legend=ys, title="Number of Generations", lwd=2, col=cols, ncol = 3, cex = 1, bty = "n", seg.len = 1, x.intersp = 0.25, y.intersp = 0.75, text.width = 0.01)


res2 <- mapply(dlx2, list(xs), ys)
matplot(xs, res2, col=cols, type="l", lty=1, lwd=2, xlab="vol scale factor", ylab="dln(Vtot)/dN")

res3 <- mapply(d2lx2, list(xs), ys)
matplot(xs, res3, col=cols, type="l", lty=1, lwd=2, xlab="vol scale factor", ylab="d^2ln(Vtot)/dN^2")

# par(mfrow = c(1,1))

res4 <- mapply(curveBcomp2, list(xs), ys)
matplot(xs, res4, col=cols, type="l", lty=1, lwd=0.5, xlab="vol scale factor", ylab="d^2lnB/dlnM^2", ylim = c(0, 10))


##


curve(expr = lx1(x, 20), from = 0.5, to = 3, n = 1000, ylim = c(0, 30))
curve(expr = lx1(x, 19), from = 0.5, to = 3, n = 1000, ylim = c(0, 30), add = TRUE)
curve(expr = lx1(x, 10), from = 0.5, to = 3, n = 1000, ylim = c(0, 15), add = TRUE)
curve(expr = lx1(x, 6), from = 0.5, to = 3, n = 1000, add = TRUE)
curve(expr = lx1(x, 3), from = 0.5, to = 3, n = 1000, add = TRUE)
curve(expr = lx1(x, 2), from = 0.5, to = 3, n = 1000, add = TRUE)

curve(expr = dlx1(x, 10), from = 0.5, to = 3, n = 1000)
curve(expr = dlx1(x, 6), from = 0.5, to = 3, n = 1000, add = TRUE)
curve(expr = dlx1(x, 2), from = 0.5, to = 3, n = 1000, add = TRUE)

curve(expr = d2lx1(x, 2), from = 0.5, to = 3, n = 1000, ylim = c(-0.15, 0))
curve(expr = d2lx1(x, 6), from = 0.5, to = 3, n = 1000, add = TRUE)
curve(expr = d2lx1(x, 10), from = 0.5, to = 3, n = 1000, add = TRUE)


curve(expr = curveBcomp(x, 2), from = 0.1, to = 10, n = 1000, ylim = c(0, 0.15), col = "black")
curve(expr = curveBcomp(x, 6), from = 0.1, to = 5, n = 1000, add= TRUE, col = "blue")
curve(expr = curveBcomp(x, 10), from = 0.1, to = 3, n = 1000, add = TRUE, col = "red")


####################    drawcontour.R

###########################################
## drawcontour.R
## Written by J.D. Forester, 17 March 2008
###########################################

## This function draws an approximate density contour based on
## empirical, bivariate data.

##change testit to FALSE if sourcing the file
testit=FALSE

draw.contour<-function(a,alpha=0.95,plot.dens=FALSE, line.width=2,
line.type=1, limits=NULL, density.res=800,spline.smooth=-1,...){
    ## a is a list or matrix of x and y coordinates (e.g.,
    ## a=list("x"=rnorm(100),"y"=rnorm(100))
    ## if a is a list or dataframe, the components must be labeled "x" and "y"
    ## if a is a matrix, the first column is assumed to be x, the second y
    ## alpha is the contour level desired
    ## if plot.dens==TRUE, then the joint density of x and y are plotted,
    ## otherwise the contour is added to the current plot.
    ## density.res controls the resolution of the density plot
    
    ## A key assumption of this function is that very little probability
    ## mass lies outside the limits of
    ## the x and y values in "a". This is likely reasonable if the number
    ## of observations in a is large.
    
    
    require("MASS")
    require("ks")
    if(length(line.width)!=length(alpha)){
        line.width <- rep(line.width[1],length(alpha))
    }
    
    if(length(line.type)!=length(alpha)){
        line.type <- rep(line.type[1],length(alpha))
    }
    
    if(is.matrix(a)){
        a=list("x"=a[,1],"y"=a[,2])
    }
    ##generate approximate density values
    if(is.null(limits)){
        limits=c(range(a$x),range(a$y))
    }
    f1<-kde2d(a$x,a$y,n=density.res,lims=limits)
    
    ##plot empirical density
    if(plot.dens) image(f1,...)
    
    if(is.null(dev.list())){
        ##ensure that there is a window in which to draw the contour
        plot(a,type="n",xlab="X",ylab="Y")
    }
    
    ##estimate critical contour value
    ## assume that density outside of plot is very small
    
    zdens <- rev(sort(f1$z))
    Czdens <- cumsum(zdens)
    Czdens <- (Czdens/Czdens[length(zdens)])
    
    ## Errors are sometimes thrown during the next for loop.  This is likely due to having selected a contour for which there do not exist any values in the z direction less than that contour value.  No automatic fix for this other than choosing alpha values that are not so low.  This happens certainly for alpha = 0.1 on gamma vs. delta gamma plots with zero filtering of scale factors (big parameter space).
    
    for(cont.level in 1:length(alpha)){
        ##This loop allows for multiple contour levels
        crit.val <- zdens[max(which(Czdens<=alpha[cont.level]))]
        
        ##determine coordinates of critical contour
        b.full=contourLines(f1,levels=crit.val)
        for(c in 1:length(b.full)){
            ##  This loop is used in case the density is multimodal or if the
            ##  desired contour
            ##  extends outside the plotting region
            
            b=list("x"=as.vector(unlist(b.full[[c]][2])),"y"=as.vector(unlist(b.full[[c]][3])))
            
            ##plot desired contour
            line.dat<-xspline(b,shape=spline.smooth,open=TRUE,draw=FALSE)
            lines(line.dat,lty=line.type[cont.level],lwd=line.width[cont.level])
        }
    }
}

##############################
##Test the function
##############################
#
# ##generate data
# if(testit){
#   n=100
#   a<-list("x"=rnorm(n,400,100),"y"=rweibull(n,2,100))
#
#   draw.contour(a=a,alpha=c(0.95,0.5,0.05),line.width=c(2,1,2),line.type=c(1,2,1),plot.dens=TRUE,
#                xlab="X", ylab="Y")
# }


####################    empirical_mse_heatmaps_groups_FINAL.R

##### This script is used to make heatmaps of metablic scaling exponents vs asymmetric branching scale factors for various methods of calculation.  The calculated values are to be compared against tip vs. volume regression-based values of metabolic scaling exponents.  The parameter delta serves as a gross metric for global asymmetry that can be used to characterize networks and rank them.  It is equal to the squart of the sum of the squares of the mean value of the asymmetric difference radial and length scale factors divided by the mean value of the asymmetric average radial and length scale factors.

library("ggplot2")
library("RColorBrewer")
library("colorRamps")
library("gtable")
library("grid")
library("gridExtra")
library("reshape2")
library("akima")
library("directlabels")

### First we plot the comparison against the tip vs. volume regression-based values. ####

setwd("/Users/alexwork/odrive/Dropbox/Research/plant_animal_vasculature_comparison/tables/filtered_3sigma_outliers_piecewise")
dir()

### Here we read in the neded data tables and restructure them slightly for easier graphing. ####

mse_funcmean_geom_tab <- read.csv(file = "mse_heatmap_table_funcmean_log2_geometric.csv", header = TRUE, na.strings = c("NaN", "NA"))[,-1]

## Here we remove the high valued mouse lung and HHT to avoid biasing the color scale.  also removing the GM mouse lungs.
mse_funcmean_geom_tab <- mse_funcmean_geom_tab[-c(4,5),]

## Add a factor for grouping by mouse lung, human head and torso, gymnosperm, and angiosperm.

Groups <- factor(x = c("balsa", "pinon", "mouse lung WT", rep("hht", 18), rep("ponderosa", 5), rep("GS Tips", 5), rep("AS Tips", 15), rep("GS Tips", 11), rep("root", 231)), levels = c("balsa", "root", "AS Tips", "GS Tips", "ponderosa", "pinon", "mouse lung WT", "hht"))
mse_funcmean_geom_tab <- data.frame(mse_funcmean_geom_tab, "Groups" = Groups)

## Need to average over the root values...

sub_table_root <- mse_funcmean_geom_tab[which(mse_funcmean_geom_tab$Species == "root"),]
root_means <- sub_table_root[-c(1:(nrow(sub_table_root))-1),]
for(i in 3:(ncol(sub_table_root)-1)){
    root_means[1,i] <- mean(sub_table_root[,i], na.rm = T)
}
root_means[,c(1,2)] <- c("root", "1")
mse_funcmean_geom_tab <- mse_funcmean_geom_tab[-which(mse_funcmean_geom_tab$Species == "root"),]
mse_funcmean_geom_tab <- rbind(mse_funcmean_geom_tab, root_means)


### Here begins the calls to plot.

View(mse_funcmean_geom_tab[which(mse_funcmean_geom_tab$beta_diff >= 0),])
View(mse_funcmean_geom_tab[which(mse_funcmean_geom_tab$beta_diff <= 0),])


quad1_tab <- mse_funcmean_geom_tab[which(mse_funcmean_geom_tab$beta_diff >= 0),]
quad2_tab <- mse_funcmean_geom_tab[which(mse_funcmean_geom_tab$beta_diff <= 0),]

levels(quad1_tab$Groups)
levels(quad2_tab$Groups)


gridx <- 10
gridy <- 20
bins <- 6

tab1_short <- quad1_tab[, c("beta_ave", "gamma_ave", "mse_asym")]
x <- tab1_short$beta_ave
y <- tab1_short$gamma_ave
z <- tab1_short$mse_asym
fld <- with(tab1_short, interp(x = beta_ave, y = gamma_ave, z = mse_asym, xo = seq(min(x), max(x), length = gridx), yo = seq(min(y), max(y), length = gridy), linear = TRUE, extrap = FALSE))

df1 <- melt(fld$z, na.rm = TRUE)
names(df1) <- c("x", "y", "mse_asym")
df1$beta_ave <- fld$x[df1$x]
df1$gamma_ave <- fld$y[df1$y]
df1$mse_asym <- round(df1$mse_asym, 3)

v <- ggplot(data = df1, aes(x = beta_ave, y = gamma_ave, z = mse_asym, colour = ..level..)) +
stat_contour(bins = 6, colour = "black") +
scale_y_reverse() +
scale_x_reverse()
direct.label(v, "top.pieces")


tab2_short <- quad2_tab[, c("beta_ave", "gamma_ave", "mse_asym")]
x <- tab2_short$beta_ave
y <- tab2_short$gamma_ave
z <- tab2_short$mse_asym
fld <- with(tab2_short, interp(x = beta_ave, y = gamma_ave, z = mse_asym, xo = seq(min(x), max(x), length = gridx), yo = seq(min(y), max(y), length = gridy), linear = TRUE, extrap = FALSE))

df2 <- melt(fld$z, na.rm = TRUE)
names(df2) <- c("x", "y", "mse_asym")
df2$beta_ave <- fld$x[df2$x]
df2$gamma_ave <- fld$y[df2$y]
df2$mse_asym <- round(df2$mse_asym, 3)

v <- ggplot(data = df2, aes(x = beta_ave, y = gamma_ave, z = mse_asym, colour = ..level..)) +
stat_contour(bins = 6, colour = "black") +
scale_y_reverse()
direct.label(v, "top.pieces")

tab3_short <- mse_funcmean_geom_tab[, c("beta_diff", "gamma_diff", "mse_asym")]
x <- tab3_short$beta_diff
y <- tab3_short$gamma_diff
z <- tab3_short$mse_asym
fld <- with(tab3_short, interp(x = beta_diff, y = gamma_diff, z = mse_asym, xo = seq(min(x), max(x), length = gridx), yo = seq(min(y), max(y), length = gridy), linear = TRUE, extrap = FALSE))

df3 <- melt(fld$z, na.r = TRUE)
names(df3) <- c("x", "y", "mse_asym")
df3$beta_diff <- fld$x[df3$x]
df3$gamma_diff <- fld$y[df3$y]

v <- ggplot(data = df3, aes(x = beta_diff, y = gamma_diff, z = mse_asym, colour = ..level..)) +
stat_contour(bins = 5, colour = "black")
direct.label(v, "top.pieces")

#############################################################################################################################

p1 <- ggplot()+
geom_point(data = quad1_tab,
aes(x = beta_ave, y = gamma_ave, shape = Groups, fill = mse_asym, color = mse_asym), # these are the background shapes
shape = c(0, 1, 3, rep(4, 16), 5, rep(6, 2), rep(2, 10), rep(6, 4), 7),
size = c(rep(3, 36), 4),
stroke = c(rep(3, 36), 1.5))+
# geom_point(data = quad1_tab,
#            aes(x = beta_ave, y = gamma_ave, color = mse_asym),
#            shape = c(15, 16, 3, rep(4, 16), 23, rep(25, 2), rep(17, 10), rep(25, 4), 7),
#            size = 3)+
# scale_shape_manual(name = "Group",
#                    labels = c("Angiosperm", "Gymnosperm", "Mammal"),
#                    values = c(15, 17, 16))+
stat_contour(data = df1,
aes(x = beta_ave, y = gamma_ave, z = mse_asym),
bins = bins,
color = "black")+
geom_vline(xintercept = 0.9)+
scale_color_gradientn(colors = rev(matlab.like(100)),
# colors =  brewer.pal(20, "RdBu"),
limits = c(0,1))+
theme(axis.text.x = element_text(size = 20),
axis.title.x = element_blank(),
axis.text.y = element_blank(),
axis.ticks.y = element_blank(),
axis.title.y = element_blank(),
# axis.title.y.right = element_text(),
legend.box = "horizontal",
# legend.position = c(0.825, 0.4),
legend.position = 'none',
legend.text = element_text(size = 12),
legend.title = element_text(size = 15),
panel.background = element_rect(fill = NA, color = "black"),
panel.grid.major = element_line(color = "gray"),
plot.margin = unit(c(0.5, 0.5, 0.5, 0.5), "cm"))+
coord_cartesian(xlim = c(0.3, 0.9), ylim = c(0.4, 1.8), expand = FALSE)+
scale_y_reverse()+
scale_x_reverse(breaks = seq(0.3, 0.9, 0.3), labels = c("0.3", "0.6", "0.9"))+
# scale_x_continuous(breaks = seq(1.0, 0.4, -0.2), labels = c("0.4", "0.6", "0.8", "1.0"))+
labs(color = "MSE", x = expression(paste("Radial Average Scale Factor ", bar(beta))), y = expression(paste("Length Average Scale Factor ", bar(gamma))))


# dev.off()


# png(filename = "mse_asym_betaave_gammaave_quad2.png", width = 5, height = 6, units = "in", res = 300)

p2 <- ggplot()+
geom_point(data = quad2_tab,
aes(x = beta_ave, y = gamma_ave, color = mse_asym),
shape = c(rep(4, 2), rep(5, 4), rep(6, 3), rep(2, 5), rep(6, 7)),
size = 3,
stroke = 3)+
# scale_shape_manual(name = "Group",
#                    labels = c("Angiosperm", "Gymnosperm", "Mammal"),
#                    values = c(15, 17, 16))+
stat_contour(data = df2,
aes(x = beta_ave, y = gamma_ave, z = mse_asym),
bins = bins,
color = "black")+
# geom_point(data = quad2_tab,
#            aes(x = beta_ave, y = gamma_ave, color = mse_asym),
#            shape = c(rep(4, 2), rep(23, 4), rep(25, 3), rep(17, 5), rep(25, 7)),
#            size = 3)+
geom_vline(xintercept = 0.9)+
scale_color_gradientn(colors = rev(matlab.like(100)),
# colors = brewer.pal(20, "RdBu"),
limits = c(0,1))+
theme(axis.text = element_text(size=20),
axis.title = element_text(size = 23),
axis.title.x = element_blank(),
legend.box = "vertical",
legend.position = "none",
legend.text = element_text(size = 12),
legend.title = element_text(size = 15),
panel.background = element_rect(fill = NA, color = "black"),
panel.grid.major = element_line(color = "gray"),
plot.margin = unit(c(0.5, 0.5, 0.5, 0.5),"cm"))+
coord_cartesian(xlim = c(0.3, 0.9), ylim = c(0.4, 1.8), expand = FALSE)+
# guide = guide_colorbar(nbin=100))+
scale_y_reverse()+
scale_x_continuous(breaks = seq(0.3, 0.9, 0.3), labels = c("0.3", "0.6", ""))+
labs(color = "MSE", x = expression(paste("Radial Average Scale Factor ", bar(beta))), y = expression(paste("Length Average Scale Factor ", bar(gamma))))


# dev.off()

gt1 <- ggplotGrob(p1)
gt2 <- ggplotGrob(p2)

newWidth = unit.pmax(gt1$widths[2:3], gt2$widths[2:3])

gt1$widths[2:3] = as.list(newWidth)
gt2$widths[2:3] = as.list(newWidth)

newHeight = unit.pmin(gt1$heights[2:3], gt2$heights[2:3])

gt1$heights[2:3] = as.list(newHeight)
gt2$heights[2:3] = as.list(newHeight)


xtitle = textGrob(label = expression(paste("Radial Average Scale Factor ", bar(beta))), gp = gpar(fontsize = 23))

png(filename = "mse_asym_betaave_gammaave.png", width = 8.5, height = 6, units = "in", res = 300)
grid.arrange(arrangeGrob(gt2, gt1, ncol = 2, bottom = xtitle))
dev.off()


## Finals
png(filename = "mse_asym_betadiff_gammadiff.png", width = 7.5, height = 6, units = "in", res = 300)

ggplot()+
geom_point(data = mse_funcmean_geom_tab,
aes(x = beta_diff, y = gamma_diff, shape = Groups, color = mse_asym),
shape = c(0, 1, 3, rep(4, 18), rep(5, 5), rep(6, 5), rep(2, 15), rep(6, 11), 7),
stroke = c(rep(3, 57), 1.5),
size = c(rep(3, 57), 4))+
# scale_shape_manual(name = "Group",
#                    labels = c("Angiosperm", "Gymnosperm", "Mammal"),
#                    values = c(15, 17, 16), guide = FALSE)+
# stat_contour(data = df3, aes(x = beta_diff, y = gamma_diff, z = mse_asym, colour = ..level..), bins = bins, colour = "black")+
# direct.label()
# geom_point(data = mse_funcmean_geom_tab, aes(x = beta_diff, y = gamma_diff, colour = mse_asym, shape = group),
#            size = 3)+
theme(axis.text = element_text(size=20),
axis.title = element_text(size = 23),
legend.position = c(0.2, 0.75),
legend.box = "horizontal",
legend.spacing.x = unit(0, "mm"),
legend.background = element_blank(),
legend.box.background = element_rect(colour = "black"),
legend.text = element_text(size = 12),
legend.title = element_text(size = 15),
panel.background = element_rect(fill = NA, colour = "black"),
panel.grid.major = element_line(colour = "gray"),
plot.margin = unit(c(0.5, 0.5, 0.5, 0.5),"cm"))+
#  geom_hline(yintercept = 0.5, colour = "red", linetype = 2, size = 1.5)+
coord_cartesian(xlim = c(-0.2, 0.2), ylim = c(-0.1, 1.1), expand = FALSE)+
scale_y_continuous(breaks = seq(0, 1.0, 0.25), labels = c("0.0", "0.25","0.5", "0.75", "1.0"))+
scale_color_gradientn(colors = rev(matlab.like(100)),
# colors = brewer.pal(20, "RdBu"),
limits = c(0,1),
# guide = guide_colorbar(nbin=100),
guide = FALSE)+
# scale_y_continuous(breaks = seq(0, 1.0, 0.25), labels = c("0.0", "0.25", "0.5", "0.75", "1.0"))+
labs(colour = "MSE", x = expression(paste("Radial Difference Scale Factor ", Delta, beta)), y = expression(paste("Length Difference Scale Factor ", Delta, gamma)))
# , title = "Heatmap of metabolic scaling exponent vs radial and length difference scale factors", subtitle = "asymmetric model evaluated on geometrically averaged scale factors"

dev.off()


#####################   formatting_global_kde_tables.R

#####
library("xtable")
library("knitr")

options(xtable.floating = FALSE)
options(xtable.timestamp = "")

##### Group beta.ave gamma.ave versus beta.diff gamma.diff
setwd("/Users/alex/odrive/Dropbox/Research/plant_animal_vasculature_comparison/tables/kdetest/filtered/group_kdetest/")
dir()

betaave_gammaave <- read.csv("group_kdetest_pvalue_betaave_gammaave.csv", header = TRUE, row.names = 1)[-c(3,4), -c(3,4)]

betadiff_gammadiff <- read.csv("group_kdetest_pvalue_betadiff_gammadiff.csv", header = TRUE, row.names = 1)[-c(3,4), -c(3,4)]

printed_table_ave_vs_diff <- mat.or.vec(8, 8)

group_names <- c("HHT*", "Mouse Lung", "Balsa", "Pinon", "Ponderosa*", "GS Tips*", "AS Tips*", "Roots")

for(i in 1:nrow(printed_table_ave_vs_diff)){
    for(j in 1:ncol(printed_table_ave_vs_diff)){
        if(j < i){
            printed_table_ave_vs_diff[i,j] <- as.numeric(betaave_gammaave[i,j])
        }else if(j > i){
            printed_table_ave_vs_diff[i,j] <- as.numeric(betadiff_gammadiff[i,j])
        }
        # else if(i == j){
        #   printed_table_ave_vs_diff[i,j] <- c("-")
        # }
    }
}

rownames(printed_table_ave_vs_diff) <- group_names
colnames(printed_table_ave_vs_diff) <- group_names
printed_table_ave_vs_diff <- as.data.frame(printed_table_ave_vs_diff)
print(xtable(printed_table_ave_vs_diff, digits = -1, align = c("|l|", rep("|c|", 8))), math.style.exponents = T)


##### Group all asymmetric scale factors versus gamma.ave gamma.diff
all_asym_scale_factors <- read.csv("group_kdetest_pvalue.csv", header = TRUE, row.names = 1)[-c(3,4), -c(3,4)]

gammaave_gammadiff <- read.csv("group_kdetest_pvalue_gammaave_gammadiff.csv", header = TRUE, row.names = 1)[-c(3,4), -c(3,4)]

printed_table_all_vs_gamma <- mat.or.vec(8, 8)

group_names <- c("HHT*", "Mouse Lung", "Balsa", "Pinon", "Ponderosa*", "GS Tips*", "AS Tips*", "Roots")

for(i in 1:nrow(printed_table_all_vs_gamma)){
    for(j in 1:ncol(printed_table_all_vs_gamma)){
        if(j < i){
            printed_table_all_vs_gamma[i,j] <- as.numeric(all_asym_scale_factors[i,j])
        }else if(j > i){
            printed_table_all_vs_gamma[i,j] <- as.numeric(gammaave_gammadiff[i,j])
        }
        # else if(i == j){
        #   printed_table_ave_vs_diff[i,j] <- c("-")
        # }
    }
}

rownames(printed_table_all_vs_gamma) <- group_names
colnames(printed_table_all_vs_gamma) <- group_names
printed_table_all_vs_gamma <- as.data.frame(printed_table_all_vs_gamma)
print(xtable(printed_table_all_vs_gamma, digits = -2, align = c("|l|", rep("|c|", 8))), math.style.exponents = T)


##### HHT beta gamma versus beta.ave beta.diff
setwd("/Users/alex/odrive/Dropbox/Research/plant_animal_vasculature_comparison/tables/kdetest/filtered/hht_kdetest/")
dir()

beta_gamma <- read.csv("hht_kdetest_pvalue_beta_gamma.csv", header = TRUE, row.names = 1)

betaave_betadiff <- read.csv("hht_kdetest_pvalue_betaave_betadiff.csv", header = TRUE, row.names = 1)

printed_table_sym_vs_betaave_betadiff <- mat.or.vec(18, 18)

hht_names <- c("HHT01", "HHT02", "HHT03", "HHT04", "HHT05", "HHT06", "HHT07", "HHT08", "HHT09", "HHT10", "HHT11", "HHT12", "HHT13", "HHT14", "HHT15", "HHT16", "HHT17", "HHT18")

for(i in 1:nrow(printed_table_sym_vs_betaave_betadiff)){
    for(j in 1:ncol(printed_table_sym_vs_betaave_betadiff)){
        if(j < i){
            printed_table_sym_vs_betaave_betadiff[i,j] <- as.numeric(beta_gamma[i,j])
        }else if(j > i){
            printed_table_sym_vs_betaave_betadiff[i,j] <- as.numeric(betaave_betadiff[i,j])
        }
        # else if(i == j){
        #   printed_table_ave_vs_diff[i,j] <- c("-")
        # }
    }
}

rownames(printed_table_sym_vs_betaave_betadiff) <- hht_names
colnames(printed_table_sym_vs_betaave_betadiff) <- hht_names
printed_table_sym_vs_betaave_betadiff <- as.data.frame(printed_table_sym_vs_betaave_betadiff)
print(xtable(printed_table_sym_vs_betaave_betadiff, digits = -1, align = c("|l|", rep("|c|", 18))), math.style.exponents = T)


##### Pond beta gamma versus beta.ave beta.diff
setwd("/Users/alex/odrive/Dropbox/Research/plant_animal_vasculature_comparison/tables/kdetest/filtered/pond_kdetest/")
dir()

beta_gamma <- read.csv("pond_kdetest_pvalue_beta_gamma.csv", header = TRUE, row.names = 1)

betaave_betadiff <- read.csv("pond_kdetest_pvalue_betaave_betadiff.csv", header = TRUE, row.names = 1)

printed_table_sym_vs_betaave_betadiff <- mat.or.vec(5, 5)

pond_names <- c("POND03", "POND05", "POND06", "POND07", "POND16")

for(i in 1:nrow(printed_table_sym_vs_betaave_betadiff)){
    for(j in 1:ncol(printed_table_sym_vs_betaave_betadiff)){
        if(j < i){
            printed_table_sym_vs_betaave_betadiff[i,j] <- as.numeric(beta_gamma[i,j])
        }else if(j > i){
            printed_table_sym_vs_betaave_betadiff[i,j] <- as.numeric(betaave_betadiff[i,j])
        }
        # else if(i == j){
        #   printed_table_ave_vs_diff[i,j] <- c("-")
        # }
    }
}

rownames(printed_table_sym_vs_betaave_betadiff) <- pond_names
colnames(printed_table_sym_vs_betaave_betadiff) <- pond_names
printed_table_sym_vs_betaave_betadiff <- as.data.frame(printed_table_sym_vs_betaave_betadiff)
print(xtable(printed_table_sym_vs_betaave_betadiff, digits = -1, align = c("|l|", rep("|c|", 5))), math.style.exponents = T)

##### Treetips beta gamma versus beta.ave beta.diff
setwd("/Users/alex/odrive/Dropbox/Research/plant_animal_vasculature_comparison/tables/kdetest/filtered/treetips_kdetest/")
dir()

beta_gamma <- read.csv("treetips_species_kdetest_pvalue_beta_gamma.csv", header = TRUE, row.names = 1)

betaave_betadiff <- read.csv("treetips_species_kdetest_pvalue_betaave_betadiff.csv", header = TRUE, row.names = 1)

printed_table_sym_vs_betaave_betadiff <- mat.or.vec(6, 6)

treetips_names <- c("Maple", "Oak", "Robinia", "Whitefir", "Dougfir", "Whitepine")

for(i in 1:nrow(printed_table_sym_vs_betaave_betadiff)){
    for(j in 1:ncol(printed_table_sym_vs_betaave_betadiff)){
        if(j < i){
            printed_table_sym_vs_betaave_betadiff[i,j] <- as.numeric(beta_gamma[i,j])
        }else if(j > i){
            printed_table_sym_vs_betaave_betadiff[i,j] <- as.numeric(betaave_betadiff[i,j])
        }
        # else if(i == j){
        #   printed_table_ave_vs_diff[i,j] <- c("-")
        # }
    }
}

rownames(printed_table_sym_vs_betaave_betadiff) <- treetips_names
colnames(printed_table_sym_vs_betaave_betadiff) <- treetips_names
printed_table_sym_vs_betaave_betadiff <- as.data.frame(printed_table_sym_vs_betaave_betadiff)
print(xtable(printed_table_sym_vs_betaave_betadiff, digits = -1, align = c("|l|", rep("|c|", 6))), math.style.exponents = T)


####################    global_kde_test.R

## This file performs kde.tests to identify distinguishability between datasets.

## Note that, even though the master versions of the datasets can be uploaded from this script, there may be more versatility provided by uploading from withing the script mse_mammal.  This is essential for the hhtlist, hhtnames, pondlist, pondnames, but is also useful for performing the testing on different axes (wbe symmetric beta and gamma).

## Performing kde.test set calculations on grouped datasets.  Here we read in the necessary datasets. This code also makes use of the lists hhtlist, pondlist, treetipslist as defined in the code mse_mammal.R #####

setwd("/Users/alexwork/odrive/Dropbox/Research/plant_animal_vasculature_comparison/datasets/masters")

balsa <- read.csv("balsa_master.csv", header = TRUE)[,-1]
balsa$nodeid <- as.character(balsa$nodeid)
balsa$parent <- as.character(balsa$parent)
hht.corner.master.df <- read.csv("hht_master.csv", header = TRUE)[,-1]
mouselung.master <- read.csv("mouselung_master.csv", header = TRUE)[,-1]
mouselung.alk1.master <- read.csv("mouselung_alk1_master.csv", header = TRUE)[,-1]
mouselung.mgp.master <- read.csv("mouselung_mgp_master.csv", header = TRUE)[,-1]
pond.corner.master.df <- read.csv("ponderosa_master.csv", header = TRUE)[,-1]
root.master <- read.csv("root_master.csv", header = TRUE)[,-1]
treetips <- read.csv("treetips_master.csv", header = TRUE)[,-1]
pinon.master <- read.csv("pinon_master.csv", header = TRUE)[,-1]

source("/Users/alexwork/odrive/Dropbox/Research/plant_animal_vasculature_comparison/R_code/synthesized/functions/outlier_filter_transform.R")

# select trait axes.  !!! Do not modify trait axes here, do so at approximately line 230. Outlier filtering is done first with all traits, using this version of the trait axes vector !!!!

grouped_datasets <- c()

trait_axes <- c("beta.ave", "beta.diff", "gamma.ave", "gamma.diff")

# trait_axes <- c("beta.ave", "beta.diff", "gamma.ave", "gamma.diff")

## Defining grouped data set from which to pull.

grouped_datasets <- rbind(outlier.filter(na.omit(hht.corner.master.df[,trait_axes]), fcol = trait_axes))
group <- c(rep("hht", nrow(outlier.filter(na.omit(hht.corner.master.df[,trait_axes]), fcol = trait_axes))))

grouped_datasets <- rbind(grouped_datasets, outlier.filter(na.omit(mouselung.master[,trait_axes]), fcol = trait_axes))
group <- c(group, rep("ml", nrow(outlier.filter(na.omit(mouselung.master[,trait_axes]), fcol = trait_axes))))

grouped_datasets <- rbind(grouped_datasets, outlier.filter(na.omit(mouselung.alk1.master[,trait_axes]), fcol = trait_axes))
group <- c(group, rep("ml alk1", nrow(outlier.filter(na.omit(mouselung.alk1.master[,trait_axes]), fcol = trait_axes))))

grouped_datasets <- rbind(grouped_datasets, outlier.filter(na.omit(mouselung.mgp.master[,trait_axes]), fcol = trait_axes))
group <- c(group, rep("ml mgp", nrow(outlier.filter(na.omit(mouselung.mgp.master[,trait_axes]), fcol = trait_axes))))

grouped_datasets <- rbind(grouped_datasets, outlier.filter(na.omit(balsa[,trait_axes]), fcol = trait_axes))
group <- c(group, rep("balsa", nrow(outlier.filter(na.omit(balsa[,trait_axes]), fcol = trait_axes))))

grouped_datasets <- rbind(grouped_datasets, outlier.filter(na.omit(pinon.master[,trait_axes]), fcol = trait_axes))
group <- c(group, rep("pinon", nrow(outlier.filter(na.omit(pinon.master[,trait_axes]), fcol = trait_axes))))

grouped_datasets <- rbind(grouped_datasets, outlier.filter(na.omit(pond.corner.master.df[,trait_axes]), fcol = trait_axes))
group <- c(group, rep("ponderosa", nrow(outlier.filter(na.omit(pond.corner.master.df[,trait_axes]), fcol = trait_axes))))

# grouped_datasets <- rbind(grouped_datasets, outlier.filter(na.omit(treetips[,trait_axes]), fcol = trait_axes))
# group <- c(group, rep("Tips", nrow(outlier.filter(na.omit(treetips[,trait_axes]), fcol = trait_axes))))


grouped_datasets <- rbind(grouped_datasets, outlier.filter(na.omit(treetips[which(treetips$class == "GS"), trait_axes]), fcol = trait_axes))
group <- c(group, rep("GS Tips", nrow(outlier.filter(na.omit(treetips[which(treetips$class == "GS"), trait_axes]), fcol = trait_axes))))

grouped_datasets <- rbind(grouped_datasets, outlier.filter(na.omit(treetips[which(treetips$class == "AS"), trait_axes]), fcol = trait_axes))
group <- c(group, rep("AS Tips", nrow(outlier.filter(na.omit(treetips[which(treetips$class == "AS"), trait_axes]), fcol = trait_axes))))

grouped_datasets <- rbind(grouped_datasets, outlier.filter(na.omit(root.master[, trait_axes]), fcol = trait_axes))
group <- c(group, rep("roots", nrow(outlier.filter(na.omit(root.master[, trait_axes]), fcol = trait_axes))))

grouped_datasets <- data.frame(grouped_datasets, group)
View(grouped_datasets)


## Quickly write to file the two data frames for sharing.
beta <- with(data = grouped_datasets, c(beta.ave + beta.diff, beta.ave - beta.diff))
gamma <- with(data = grouped_datasets, c(gamma.ave + gamma.diff, gamma.ave - gamma.diff))
group <- c(group, group)
test <- na.omit(data.frame(beta, gamma, group))

setwd("/Users/alexwork/Desktop")
write.csv(x = grouped_datasets, file = "filtered_grouped_asymmetric_scale_factor_values.csv")
write.csv(x = test, file = "filtered_grouped_symmetric_scale_factor_values.csv")

################################################################################################

library("ks")

## Now we will build similar tables of tstats and pvalues for the kde.test.  Starting at the group level.  Can modify trait_axes here to subset for different scale factor groups. ####


trait_axes <- c("gamma.ave", "gamma.diff")

pvalue_matrix <- matrix(nrow = length(unique(group)), ncol = length(unique(group)))
dimnames(pvalue_matrix) = list(unique(group), unique(group))
tstat_matrix <- matrix(nrow = length(unique(group)), ncol = length(unique(group)))
dimnames(tstat_matrix) = list(unique(group), unique(group))

group.test.list <- list()
for(i in 1:length(unique(group))){
    if(trait_axes[1] == "beta"){
        temp <- grouped_datasets[which(grouped_datasets$group == unique(group)[i]),]
        beta <- with(temp, c(beta.ave + beta.diff, beta.ave - beta.diff))
        gamma <- with(temp, c(gamma.ave + gamma.diff, gamma.ave - gamma.diff))
        group.test.list[[i]] <- data.frame(beta, gamma)
    }else{
        group.test.list[[i]] <- grouped_datasets[which(grouped_datasets$group == unique(group)[i]),trait_axes]
    }
}

for(i in 1:length(unique(group))){
    print(sprintf("i = %i", i))
    for(j in i:length(unique(group))){
        print(sprintf("j = %i", j))
        if((class(group.test.list[[i]]) == "data.frame")){
            test <- kde.test(group.test.list[[i]], group.test.list[[j]])
            pvalue_matrix[i,j] <- test$pvalue
            tstat_matrix[i,j] <- test$Tstat
        }
        else if((class(group.test.list[[i]]) == "numeric")){
            test <- ks.test(group.test.list[[i]], group.test.list[[j]])
            pvalue_matrix[i,j] <- test$p.value
            tstat_matrix[i,j] <- test$statistic
        }
    }
}

for(i in 1:nrow(pvalue_matrix)){
    for(j in 1:ncol(pvalue_matrix)){
        if(!is.na(pvalue_matrix[i,j])){
            pvalue_matrix[j,i] <- pvalue_matrix[i,j]
        }
    }
}
for(i in 1:nrow(tstat_matrix)){
    for(j in 1:ncol(tstat_matrix)){
        if(!is.na(tstat_matrix[i,j])){
            tstat_matrix[j,i] <- tstat_matrix[i,j]
        }
    }
}

setwd("/Users/alexwork/odrive/Dropbox/Research/plant_animal_vasculature_comparison/tables/kdetest/filtered/group_kdetest")

write.csv(tstat_matrix, file = "group_kdetest_tstat_beta_gamma.csv")
write.csv(pvalue_matrix, file = "group_kdetest_pvalue_beta_gamma.csv")

################################################################################################

## Now we will build kde.test tables for testing within the hht data, the ponderosa data, and the tips data.  Starting with the HHT data.
## First break hht_master.csv into hhtlist with each list entry being an outlier.filtered datatable for that individual.  Do this instead of the filtering over the whole sheet, idea is to filter individually tested groups/datasets.

trait_axes <- c("beta.ave", "beta.diff", "gamma.ave", "gamma.diff")
hhtlist <- list()
for(i in 1:18){
    hhtlist[[i]] <- outlier.filter(na.omit(hht.corner.master.df[which(hht.corner.master.df$indv == levels(hht.corner.master.df$indv)[i]),trait_axes]), fcol = trait_axes)
}

trait_axes = c("beta", "gamma")

for(i in 1:length(hhtlist)){
    if(trait_axes[1] == "beta"){
        temp <- hhtlist[[i]]
        beta <- with(temp, c(beta.ave + beta.diff, beta.ave - beta.diff))
        gamma <- with(temp, c(gamma.ave + gamma.diff, gamma.ave - gamma.diff))
        hhtlist[[i]] <- data.frame(beta, gamma)
    }
}

## Initialize matrices

hhtnames <- c("hht01", "hht02", "hht03", "hht04", "hht05", "hht06", "hht07", "hht08", "hht09", "hht10", "hht11", "hht12", "hht13", "hht14", "hht15", "hht16", "hht17", "hht18")

hht_tstat_matrix <- matrix(nrow = length(hhtlist), ncol = length(hhtlist))
dimnames(hht_tstat_matrix) = list(hhtnames, hhtnames)
hht_pvalue_matrix <- matrix(nrow = length(hhtlist), ncol = length(hhtlist))
dimnames(hht_pvalue_matrix) = list(hhtnames, hhtnames)

## Populate matrices
for(i in 1:length(hhtlist)){
    print(sprintf("i = %i", i))
    for(j in i:length(hhtlist)){
        print(sprintf("j = %i", j))
        if(length(trait_axes) > 1){
            test <- kde.test(hhtlist[[i]][,trait_axes], hhtlist[[j]][,trait_axes])
            hht_pvalue_matrix[i,j] <- test$pvalue
            hht_tstat_matrix[i,j] <- test$Tstat
        }
        else if(length(trait_axes) == 1){
            test <- ks.test(hhtlist[[i]][,trait_axes], hhtlist[[j]][,trait_axes])
            hht_pvalue_matrix[i,j] <- test$p.value
            hht_tstat_matrix[i,j] <- test$statistic
        }
    }
}
for(i in 1:nrow(hht_pvalue_matrix)){
    for(j in 1:ncol(hht_pvalue_matrix)){
        if(!is.na(hht_pvalue_matrix[i,j])){
            hht_pvalue_matrix[j,i] <- hht_pvalue_matrix[i,j]
        }
    }
}
for(i in 1:nrow(hht_tstat_matrix)){
    for(j in 1:ncol(hht_tstat_matrix)){
        if(!is.na(hht_tstat_matrix[i,j])){
            hht_tstat_matrix[j,i] <- hht_tstat_matrix[i,j]
        }
    }
}

setwd("/Users/alex/odrive/Dropbox/Research/plant_animal_vasculature_comparison/tables/kdetest/filtered/hht_kdetest")

write.table(hht_tstat_matrix,file = "hht_kdetest_tstat_beta_gamma.csv",sep = ",", row.names = TRUE, col.names = TRUE,na = "NA", eol = "\r")
write.table(hht_pvalue_matrix,file = "hht_kdetest_pvalue_beta_gamma.csv",sep = ",", row.names = TRUE, col.names = TRUE,na = "NA", eol = "\r")

################################################################################################

## Now we will build kde.test tables for testing within the hht data, the ponderosa data, and the tips data.  Now for the ponderosa data.

pondlist <- list()
trait_axes <- c("beta.ave", "beta.diff", "gamma.ave", "gamma.diff")
for(i in 1:5){
    pondlist[[i]] <- outlier.filter(na.omit(pond.corner.master.df[which(pond.corner.master.df$indv == levels(pond.corner.master.df$indv)[i]),trait_axes]), fcol = trait_axes)
}

setwd("~/Dropbox/Research/plant_animal_vasculature_comparison/datasets/bentley_balsa_pinon_pond_edited/ponderosa")
filenames <- list.files(path=getwd(), pattern="_edited.csv")
pondnames <- substr(filenames,1,6)


trait_axes = c("beta", "gamma")

for(i in 1:length(pondlist)){
    if(trait_axes[1] == "beta"){
        temp <- pondlist[[i]]
        beta <- with(temp, c(beta.ave + beta.diff, beta.ave - beta.diff))
        gamma <- with(temp, c(gamma.ave + gamma.diff, gamma.ave - gamma.diff))
        pondlist[[i]] <- data.frame(beta, gamma)
    }
}


## Initialize matrices

pond_tstat_matrix <- matrix(nrow = length(pondlist), ncol = length(pondlist))
dimnames(pond_tstat_matrix) = list(pondnames, pondnames)
pond_pvalue_matrix <- matrix(nrow = length(pondlist), ncol = length(pondlist))
dimnames(pond_pvalue_matrix) = list(pondnames, pondnames)

## Populate matrices
for(i in 1:length(pondlist)){
    print(sprintf("i = %i", i))
    for(j in i:length(pondlist)){
        print(sprintf("j = %i", j))
        if(length(trait_axes) > 1){
            test <- kde.test(pondlist[[i]][,trait_axes], pondlist[[j]][,trait_axes])
            pond_pvalue_matrix[i,j] <- test$pvalue
            pond_tstat_matrix[i,j] <- test$Tstat
        }
        else if(length(trait_axes) == 1){
            test <- ks.test(pondlist[[i]][,trait_axes], pondlist[[j]][,trait_axes])
            pond_pvalue_matrix[i,j] <- test$p.value
            pond_tstat_matrix[i,j] <- test$statistic
        }
    }
}
for(i in 1:nrow(pond_pvalue_matrix)){
    for(j in 1:ncol(pond_pvalue_matrix)){
        if(!is.na(pond_pvalue_matrix[i,j])){
            pond_pvalue_matrix[j,i] <- pond_pvalue_matrix[i,j]
        }
    }
}
for(i in 1:nrow(pond_tstat_matrix)){
    for(j in 1:ncol(pond_tstat_matrix)){
        if(!is.na(pond_tstat_matrix[i,j])){
            pond_tstat_matrix[j,i] <- pond_tstat_matrix[i,j]
        }
    }
}

setwd("/Users/alex/odrive/Dropbox/Research/plant_animal_vasculature_comparison/tables/kdetest/filtered/pond_kdetest")

write.table(pond_tstat_matrix,file = "pond_kdetest_tstat_beta_gamma.csv",sep = ",", row.names = TRUE, col.names = TRUE,na = "NA", eol = "\r")
write.table(pond_pvalue_matrix,file = "pond_kdetest_pvalue_beta_gamma.csv",sep = ",", row.names = TRUE, col.names = TRUE,na = "NA", eol = "\r")

################################################################################################

## Now we will build kde.test tables for testing within the hht data, the ponderosa data, and the tips data.  Now for the tips data.  We will break apart by species for ease, consider by sample afterward.

treetipslist <- list()
trait_axes <- c("beta.ave", "beta.diff", "gamma.ave", "gamma.diff")
for(i in 1:6){
    treetipslist[[i]] <- outlier.filter(na.omit(treetips[which(treetips$spcs == levels(treetips$spcs)[i]),trait_axes]), fcol = trait_axes)
}


trait_axes = c("beta", "gamma")

for(i in 1:length(treetipslist)){
    if(trait_axes[1] == "beta"){
        temp <- treetipslist[[i]]
        beta <- with(temp, c(beta.ave + beta.diff, beta.ave - beta.diff))
        gamma <- with(temp, c(gamma.ave + gamma.diff, gamma.ave - gamma.diff))
        treetipslist[[i]] <- data.frame(beta, gamma)
    }
}

speciesnames <- as.character(unique(treetips$spcs))

## Initialize matrices

treetips_species_tstat_matrix <- matrix(nrow = length(speciesnames), ncol = length(speciesnames))
dimnames(treetips_species_tstat_matrix) = list(speciesnames, speciesnames)
treetips_species_pvalue_matrix <- matrix(nrow = length(speciesnames), ncol = length(speciesnames))
dimnames(treetips_species_pvalue_matrix) = list(speciesnames, speciesnames)

## Populate matrices
for(i in 1:length(speciesnames)){
    print(sprintf("i = %i", i))
    for(j in i:length(speciesnames)){
        print(sprintf("j = %i", j))
        if(length(trait_axes) > 1){
            test <- kde.test(treetipslist[[i]][,trait_axes], treetipslist[[j]][,trait_axes])
            treetips_species_pvalue_matrix[i,j] <- test$pvalue
            treetips_species_tstat_matrix[i,j] <- test$Tstat
        }
        else if(length(trait_axes) == 1){
            test <- ks.test(treetipslist[[i]][,trait_axes], treetipslist[[j]][,trait_axes])
            treetips_species_pvalue_matrix[i,j] <- test$p.value
            treetips_species_tstat_matrix[i,j] <- test$statistic
        }
    }
}
for(i in 1:nrow(treetips_species_pvalue_matrix)){
    for(j in 1:ncol(treetips_species_pvalue_matrix)){
        if(!is.na(treetips_species_pvalue_matrix[i,j])){
            treetips_species_pvalue_matrix[j,i] <- treetips_species_pvalue_matrix[i,j]
        }
    }
}
for(i in 1:nrow(treetips_species_tstat_matrix)){
    for(j in 1:ncol(treetips_species_tstat_matrix)){
        if(!is.na(treetips_species_tstat_matrix[i,j])){
            treetips_species_tstat_matrix[j,i] <- treetips_species_tstat_matrix[i,j]
        }
    }
}

## Quickly reorder rows and columns to line up with mse_methods listing.
treetips_species_pvalue_matrix[c(2, 3, 4, 5, 1, 6), c(2,3, 4, 5, 1, 6)]

setwd("/Users/alex/odrive/Dropbox/Research/plant_animal_vasculature_comparison/tables/kdetest/filtered/treetips_kdetest/")

write.table(treetips_species_tstat_matrix[c(2, 3, 4, 5, 1, 6), c(2,3, 4, 5, 1, 6)],file = "treetips_species_kdetest_tstat_beta_gamma.csv",sep = ",", row.names = TRUE, col.names = TRUE,na = "NA", eol = "\r")
write.table(treetips_species_pvalue_matrix[c(2, 3, 4, 5, 1, 6), c(2,3, 4, 5, 1, 6)],file = "treetips_species_kdetest_pvalue_beta_gamma.csv",sep = ",", row.names = TRUE, col.names = TRUE,na = "NA", eol = "\r")


## Global testing of mammals vs. plants... note that the order of most to least significant is (1) all four, (2) beta ave / beta diff, (3) gamma ave / gamma diff, (4) beta ave / gamma ave, (5) beta diff / gamma diff.  Fact taht gamma ave / gamma diff is still significant is worth stating in paper and talk, as you no longer have to report it as a null result!!!  Yay!!!

setwd("/Users/alexwork/odrive/Dropbox/Research/plant_animal_vasculature_comparison/datasets/masters/filtered/")
asym_scale_factors <- read.csv(file = "filtered_grouped_asymmetric_scale_factor_values.csv", header = TRUE, row.names = 1)
asym_scale_factors <- asym_scale_factors[-which((asym_scale_factors$group == "ml alk1") | (asym_scale_factors$group == "ml mgp")),]

sym_scale_factors <- read.csv(file = "filtered_grouped_symmetric_scale_factor_values.csv", header = TRUE, row.names = 1)
sym_scale_factors <- sym_scale_factors[-which((sym_scale_factors$group == "ml alk1") | (sym_scale_factors$group == "ml mgp")),]


# Initialize class column for mammal/plant IDs.
sym_class <- mat.or.vec(nrow(sym_scale_factors),1)
asym_class <- mat.or.vec(nrow(asym_scale_factors),1)

# Extract indeces for mammal and plant rows.
sym_mammal_indx <- c(which((sym_scale_factors$group == "hht") | (sym_scale_factors$group == "ml")))
sym_plant_indx <- c(which((sym_scale_factors$group != "hht") & (sym_scale_factors$group != "ml")))

asym_mammal_indx <- c(which((asym_scale_factors$group == "hht") | (asym_scale_factors$group == "ml")))
asym_plant_indx <- c(which((asym_scale_factors$group != "hht") & (asym_scale_factors$group != "ml")))

# Build and add column of animal class.
sym_class[sym_mammal_indx] <- "mammal"
sym_class[sym_plant_indx] <- "plant"

asym_class[asym_mammal_indx] <- "mammal"
asym_class[asym_plant_indx] <- "plant"

sym_scale_factors <- data.frame(sym_scale_factors, "class" = sym_class)
asym_scale_factors <- data.frame(asym_scale_factors, "class" = asym_class)

# Beta / gamma, p = 0.018
kde.test(x1 = sym_scale_factors[which(sym_scale_factors$class == "mammal"),c(1,2)], x2 = sym_scale_factors[which(sym_scale_factors$class == "plant"), c(1,2)])

# Beta ave / beta diff, p = 0.00011
kde.test(x1 = asym_scale_factors[which(asym_scale_factors$class == "mammal"),c(1,2)], x2 = asym_scale_factors[which(asym_scale_factors$class == "plant"), c(1,2)])

# Gamma ave / gamma diff, p = 0.0049
kde.test(x1 = asym_scale_factors[which(asym_scale_factors$class == "mammal"),c(3,4)], x2 = asym_scale_factors[which(asym_scale_factors$class == "plant"), c(3,4)])

# beta ave / gamma ave, p = 0.024
kde.test(x1 = asym_scale_factors[which(asym_scale_factors$class == "mammal"),c(1,3)], x2 = asym_scale_factors[which(asym_scale_factors$class == "plant"), c(1,3)])

# beta diff / gamma diff, p = 0.088
kde.test(x1 = asym_scale_factors[which(asym_scale_factors$class == "mammal"),c(2,4)], x2 = asym_scale_factors[which(asym_scale_factors$class == "plant"), c(2,4)])

# All four, p = 0.0000058
kde.test(x1 = asym_scale_factors[which(asym_scale_factors$class == "mammal"),c(1:4)], x2 = asym_scale_factors[which(asym_scale_factors$class == "plant"), c(1:4)])


#####################   method_performance_metrics.R

## Testing classifier performance metrics.

## First read in scores from KDE method. ####

# Radial Plant-Mammal scores.
setwd("/Users/alexwork/odrive/Dropbox/Research/plant_animal_vasculature_comparison/methods_comparison/counting_contour_points_kde/point_count_graphs/mammal_plant/radial_scale_factors")

rad_tablelist <- list()
rad_tablenames <- dir()[grep(pattern = "_*.csv", x = dir())]
for(i in 1:(length(rad_tablenames))){
    rad_tablelist[[i]] <- read.csv(file = rad_tablenames[i], header = TRUE)
}
rad_tablelist[[1]]

# Length Plant-Mammal scores.
setwd("~/odrive/Dropbox/Research/plant_animal_vasculature_comparison/methods_comparison/counting_contour_points_kde/point_count_graphs/mammal_plant/length_scale_factors")

len_tablelist <- list()
len_tablenames <- dir()[grep(pattern = "_*.csv", x = dir())]
for(i in 1:length(len_tablenames)){
    len_tablelist[[i]] <- read.csv(file = len_tablenames[i], header = TRUE)
}
len_tablelist[[1]]

# Structure to have same format as ML methods will.

len_g1_cor <- c()
len_g1_incor <- c()
len_g2_cor <- c()
len_g2_incor <- c()

rad_g1_cor <- c()
rad_g1_incor <- c()
rad_g2_cor <- c()
rad_g2_incor <- c()

for(i in 1:length(rad_tablelist)){
    rad_g1_cor[i] <- rad_tablelist[[i]][1,2]
    rad_g1_incor[i] <- rad_tablelist[[i]][1,3]
    rad_g2_cor[i] <- rad_tablelist[[i]][2,3]
    rad_g2_incor[i] <- rad_tablelist[[i]][2,2]
}

kde_radial_scores <- list(rad_g1_cor, rad_g1_incor, rad_g2_cor, rad_g2_incor)

for(i in 1:length(len_tablelist)){
    len_g1_cor[i] <- len_tablelist[[i]][1,2]
    len_g1_incor[i] <- len_tablelist[[i]][1,3]
    len_g2_cor[i] <- len_tablelist[[i]][2,3]
    len_g2_incor[i] <- len_tablelist[[i]][2,2]
}

kde_length_scores <- list(len_g1_cor, len_g1_incor, len_g2_cor, len_g2_incor)


## Second read in scores from ML methods. ####

setwd("/Users/alexwork/odrive/Dropbox/Research/plant_animal_vasculature_comparison/methods_comparison/counting_contour_points_ml/point_count_graphs/")
dir()

# Read in datafiles.
svm_radial <- read.csv(file = "beta_ave_beta_diff_SVM.csv", header = TRUE)
svm_length <- read.csv(file = "gamma_ave_gamma_diff_SVM.csv", header = TRUE)
logreg_radial <- read.csv(file = "beta_ave_beta_diff_LogReg.csv", header = TRUE)
logreg_length <- read.csv(file = "gamma_ave_gamma_diff_LogReg.csv", header = TRUE)

# Extract scores.

ml_score_counter <- function(testdf, bins = 20){
    group1_bins <- seq(from = 1, to = 0.5, length.out = bins)
    # Reverse group2_bins with respect to group1_bins so that the same index corresponds to relatively the same threshold.
    group2_bins <- seq(from = 0.0, to = 0.5, length.out = bins)
    
    
    ## Note that the language we are using, correct group1 is for correctly identified mammals, and correct group2 is for correctly identified plants.  Also, with Jocelyn's coding, zeros are mammals and ones are plants, and points with scores > 0.5 are labelled zeros, while points with scores < 0.5 are labelled ones.
    classified_correct_group1 <- c()
    classified_incorrect_group1 <- c()
    classified_correct_group2 <- c()
    classified_incorrect_group2 <- c()
    
    for(i in 1:(length(group1_bins) - 1)){
        ## Note that we are taking advantage of the fact that no probability scores of zero are reported, thus we can get away with using a strictly greater than sign on the lower end of the bin counting.
        group1_class <- which((testdf$probabilities <= group1_bins[i]) & (testdf$probabilities > group1_bins[i+1]))
        group2_class <- which((testdf$probabilities > group2_bins[i]) & (testdf$probabilities <= group2_bins[i+1]))
        
        
        group1_class_correct <- length(which(testdf[group1_class,]$type == 0))
        group1_class_incorrect <- length(which(testdf[group1_class,]$type == 1))
        group2_class_correct <- length(which(testdf[group2_class,]$type == 1))
        group2_class_incorrect <- length(which(testdf[group2_class,]$type == 0))
        
        
        classified_correct_group1[i] <- group1_class_correct
        classified_incorrect_group1[i] <- group1_class_incorrect
        classified_correct_group2[i] <- group2_class_correct
        classified_incorrect_group2[i] <- group2_class_incorrect
    }
    
    classified_correct_group1 <- cumsum(classified_correct_group1)
    classified_incorrect_group1 <- cumsum(classified_incorrect_group1)
    classified_correct_group2 <- cumsum(classified_correct_group2)
    classified_incorrect_group2 <- cumsum(classified_incorrect_group2)
    return(list(classified_correct_group1, classified_incorrect_group1, classified_correct_group2, classified_incorrect_group2))
    
}

svm_radial_scores <- ml_score_counter(svm_radial, bins = 17)
svm_length_scores <- ml_score_counter(svm_length)
logreg_radial_scores <- ml_score_counter(logreg_radial, bins = 17)
logreg_length_scores <- ml_score_counter(logreg_length)

logreg_length_scores


kde_point_count <- c()
svm_point_count <- c()
logreg_point_count <- c()

for(i in 1:length(kde_radial_scores[[1]])){
    kde_point_count[i] <- kde_radial_scores[[1]][i] + kde_radial_scores[[2]][i] + kde_radial_scores[[3]][i] + kde_radial_scores[[4]][i]
}

for(i in 1:length(svm_radial_scores[[1]])){
    svm_point_count[i] <- svm_radial_scores[[1]][i] + svm_radial_scores[[2]][i] + svm_radial_scores[[3]][i] + svm_radial_scores[[4]][i]
}

for(i in 1:length(logreg_radial_scores[[1]])){
    logreg_point_count[i] <- logreg_radial_scores[[1]][i] + logreg_radial_scores[[2]][i] + logreg_radial_scores[[3]][i] + logreg_radial_scores[[4]][i]
}

kde_point_count
svm_point_count
logreg_point_count

kde_point_count <- kde_point_count/max(kde_point_count)
svm_point_count <- svm_point_count/max(svm_point_count)
logreg_point_count <- logreg_point_count/max(logreg_point_count)


## ROC Method ####

## First write function to calculate score for each "trial".  Then plot.  May not need function, we are simply plotting True positive rate vs false positive rate.

svm_radial_mammal_tpr <- svm_radial_scores[[1]]/(svm_radial_scores[[1]] + svm_radial_scores[[4]])
svm_radial_mammal_fpr <- svm_radial_scores[[2]]/(svm_radial_scores[[2]] + svm_radial_scores[[3]])
svm_radial_plant_tpr <- svm_radial_scores[[3]]/(svm_radial_scores[[3]] + svm_radial_scores[[2]])
svm_radial_plant_fpr <- svm_radial_scores[[4]]/(svm_radial_scores[[4]] + svm_radial_scores[[1]])

logreg_radial_mammal_tpr <- logreg_radial_scores[[1]]/(logreg_radial_scores[[1]] + logreg_radial_scores[[4]])
logreg_radial_mammal_fpr <- logreg_radial_scores[[2]]/(logreg_radial_scores[[2]] + logreg_radial_scores[[3]])
logreg_radial_plant_tpr <- logreg_radial_scores[[3]]/(logreg_radial_scores[[3]] + logreg_radial_scores[[2]])
logreg_radial_plant_fpr <- logreg_radial_scores[[4]]/(logreg_radial_scores[[4]] + logreg_radial_scores[[1]])

kde_radial_mammal_tpr <- kde_radial_scores[[1]]/(kde_radial_scores[[1]] + kde_radial_scores[[4]])
kde_radial_mammal_fpr <- kde_radial_scores[[2]]/(kde_radial_scores[[2]] + kde_radial_scores[[3]])
kde_radial_plant_tpr <- kde_radial_scores[[3]]/(kde_radial_scores[[3]] + kde_radial_scores[[2]])
kde_radial_plant_fpr <- kde_radial_scores[[4]]/(kde_radial_scores[[4]] + kde_radial_scores[[1]])


setwd("/Users/alexwork/Desktop")
scale <- seq(from = 0.1, to = 2, length.out = 16)
png(filename = "roc_plant_positive.png", width = 4, height = 4, units = "in", res = 300)

plot(x = svm_radial_plant_fpr, y = svm_radial_plant_tpr, col = rgb(red = 0, green = 0, blue = 0, alpha = 0.5), xlim = c(0, 1), ylim = c(0,1), ylab = "True Positive Rate", xlab = "False Positive Rate", pch = 15, cex = scale, las = 1)
lines(x = seq(from = 0, to = 1, by = 0.1), y = seq(from = 0, to = 1, by = 0.1), lty = 2)
# *svm_point_count
# main = "ROC for plant as Positive Group",
# points(x = svm_radial_plant_fpr, y = svm_radial_plant_tpr, col = "red", pch = 1)
points(x = logreg_radial_plant_fpr, y = logreg_radial_plant_tpr, col = rgb(red = 0, green = 0, blue = 1, alpha = 0.5), pch = 17, cex = scale)
# *logreg_point_count
# points(x = logreg_radial_plant_fpr, y = logreg_radial_plant_tpr, col = "red", pch = 2)
points(x = kde_radial_plant_fpr, y = kde_radial_plant_tpr, col = rgb(red = 1, green = 0, blue = 0, alpha = 0.5), pch = 19, cex = scale)
# *kde_point_count
# points(x = kde_radial_mammal_fpr, y = kde_radial_mammal_tpr, col = "red", pch = 3)
legend(x = 0.6, y = 0.4, legend = c("SVM", "LogReg", "KDE"), pch = c(15, 17, 19), col = c(rgb(red = 0, green = 0, blue = 0, alpha = 0.5), rgb(red = 0, green = 0, blue = 1, alpha = 0.5), rgb(red = 1, green = 0, blue = 0, alpha = 0.5)), bty = "n")
# legend(x = 0.6, y = 0.5, title = "Classification\nSignificance", legend = c("High", "Medium", "Low"), col = c(rep(rgb(red = 0, green = 0, blue = 0, alpha = 0.5), 3)), pch = c(19, 19, 19), pt.cex = c(0.5, 1, 2), bty = "n")]

dev.off()


plot(x = svm_radial_plant_fpr, y = svm_radial_plant_tpr, col = "red", xlim = c(0, 1), ylim = c(0,1), ylab = "True Positive Rate", xlab = "False Positive Rate", pch = 1, main = "ROC for Plant as Positive Group")
# points(x = svm_radial_plant_fpr, y = svm_radial_plant_tpr, col = "red", pch = 1)
# points(x = logreg_radial_mammal_fpr, y = logreg_radial_mammal_tpr, col = "blue", pch = 2)
points(x = logreg_radial_plant_fpr, y = logreg_radial_plant_tpr, col = "red", pch = 2)
# points(x = kde_radial_mammal_fpr, y = kde_radial_mammal_tpr, col = "blue", pch = 3)
points(x = kde_radial_plant_fpr, y = kde_radial_plant_tpr, col = "red", pch = 3)
legend(x = 0.8, y = 0.2, legend = c("SVM", "LogReg", "KDE"), pch = c(1, 2, 3), col = rep("red", 3))


## Length ROC curves.
svm_length_mammal_tpr <- svm_length_scores[[1]]/(svm_length_scores[[1]] + svm_length_scores[[4]])
svm_length_mammal_fpr <- svm_length_scores[[2]]/(svm_length_scores[[2]] + svm_length_scores[[3]])
svm_length_plant_tpr <- svm_length_scores[[3]]/(svm_length_scores[[3]] + svm_length_scores[[2]])
svm_length_plant_fpr <- svm_length_scores[[4]]/(svm_length_scores[[4]] + svm_length_scores[[1]])

logreg_length_mammal_tpr <- logreg_length_scores[[1]]/(logreg_length_scores[[1]] + logreg_length_scores[[4]])
logreg_length_mammal_fpr <- logreg_length_scores[[2]]/(logreg_length_scores[[2]] + logreg_length_scores[[3]])
logreg_length_plant_tpr <- logreg_length_scores[[3]]/(logreg_length_scores[[3]] + logreg_length_scores[[2]])
logreg_length_plant_fpr <- logreg_length_scores[[4]]/(logreg_length_scores[[4]] + logreg_length_scores[[1]])

kde_length_mammal_tpr <- kde_length_scores[[1]]/(kde_length_scores[[1]] + kde_length_scores[[4]])
kde_length_mammal_fpr <- kde_length_scores[[2]]/(kde_length_scores[[2]] + kde_length_scores[[3]])
kde_length_plant_tpr <- kde_length_scores[[3]]/(kde_length_scores[[3]] + kde_length_scores[[2]])
kde_length_plant_fpr <- kde_length_scores[[4]]/(kde_length_scores[[4]] + kde_length_scores[[1]])

plot(x = svm_length_mammal_fpr, y = svm_length_mammal_tpr, col = "blue", xlim = c(0, 1), ylim = c(0,1), ylab = "True Positive Rate", xlab = "False Positive Rate")
points(x = svm_length_plant_fpr, y = svm_length_plant_tpr, col = "red")
points(x = logreg_length_mammal_fpr, y = logreg_length_mammal_tpr, col = "blue", pch = 2)
points(x = logreg_length_plant_fpr, y = logreg_length_plant_tpr, col = "red", pch = 2)
points(x = kde_length_mammal_fpr, y = kde_length_mammal_tpr, col = "blue", pch = 3)
points(x = kde_length_plant_fpr, y = kde_length_plant_tpr, col = "red", pch = 3)


### Precision vs Recall

svm_radial_mammal_prec <- svm_radial_scores[[1]]/(svm_radial_scores[[1]] + svm_radial_scores[[2]])
svm_radial_mammal_rec <- svm_radial_scores[[1]]/(svm_radial_scores[[1]] + svm_radial_scores[[4]])

logreg_radial_mammal_prec <- logreg_radial_scores[[1]]/(logreg_radial_scores[[1]] + logreg_radial_scores[[2]])
logreg_radial_mammal_rec <- logreg_radial_scores[[1]]/(logreg_radial_scores[[1]] + logreg_radial_scores[[4]])

kde_radial_mammal_prec <- kde_radial_scores[[1]]/(kde_radial_scores[[1]] + kde_radial_scores[[2]])
kde_radial_mammal_rec <- kde_radial_scores[[1]]/(kde_radial_scores[[1]] + kde_radial_scores[[4]])

svm_radial_mammal_prec
svm_radial_mammal_rec
kde_radial_mammal_prec
kde_radial_mammal_rec

svm_radial_scores
kde_radial_scores

plot(x = kde_radial_mammal_rec, y = kde_radial_mammal_prec)
plot(x = svm_radial_mammal_rec, y = svm_radial_mammal_prec)
plot(x = logreg_radial_mammal_rec, y = logreg_radial_mammal_prec)


####################    mse_calcs_for_heatmap.R

##  This version of mse_calcs_for_heatmap is based on the volume scaling that telescopes toward the tips.  It may be that this approach is flawed due to the fact that the tips must get larger for superlinear volume scaling, making adherance to assumption of all tips being equal difficult.

setwd("/Users/alexwork/odrive/Dropbox/Research/plant_animal_vasculature_comparison/datasets/masters/")

## Read in data tables.

balsa <- read.csv("balsa_master.csv", header = T)[,-1]
balsa$nodeid <- as.character(balsa$nodeid)
balsa$parent <- as.character(balsa$parent)
hht <- read.csv("hht_master.csv", header = T)[,-1]
ml <- read.csv("mouselung_master.csv", header = T)[,-1]
ml_alk1 <- read.csv("mouselung_alk1_master.csv", header = T)[,-1]
ml_mgp <- read.csv("mouselung_mgp_master.csv", header = T)[,-1]
pinon <- read.csv("pinon_master.csv", header = T)[,-1]
pond <- read.csv("ponderosa_master.csv", header = T)[,-1]
root <- read.csv("root_master.csv", header = T)[,-1]
root$indv <- as.factor(root$indv)
root <- root[-c(165:167, 220:225, 1029:1031),]

treetips <- read.csv("treetips_master.csv", header = T)[,-1]
treetips$parent <- as.character(treetips$parent)


## Read in source functions for analysis.

source("/Users/alexwork/odrive/Dropbox/Research/plant_animal_vasculature_comparison/R_code/synthesized/functions/mse_plus_error_funcs.R")
source("/Users/alexwork/odrive/Dropbox/Research/plant_animal_vasculature_comparison/R_code/synthesized/mse_function.R")
source("/Users/alexwork/odrive/Dropbox/Research/plant_animal_vasculature_comparison/R_code/synthesized/functions/outlier_filter_transform.R")
source("/Users/alexwork/odrive/Dropbox/Research/plant_animal_vasculature_comparison/R_code/synthesized/functions/single_mean_calc.R")

mse_heatmap_tab <- mat.or.vec(0,15)
# method is where we can toggle between different techniques for averaging over scale factor values.  Options are "arithmetic", "geometric", "hierarchical_linear_filter", "hierarchical_linear_nofilter", "hierarchical_logarithmic_filter", and "hierarchical_logarithmic_nofilter".  The options of "arithmetic" and "geometric" are filtered by default.  To toggle filtering schemes, one must modify the outlier.filter function directly.
method <- "geometric"
colnames(mse_heatmap_tab) <- c("Species", "ID", "mse_sym", "mse_sym_err_low", "mse_sym_err_up", "sym_vol_fac", "mse_asym", "mse_asym_err_low", "mse_asym_err_up", "asym_vol_fac", "beta_ave", "beta_diff", "gamma_ave", "gamma_diff", "N")


## Non-repeated individuals, balsa, pinon, root, mouse lung.
networks <- list(balsa, pinon, ml, ml_alk1, ml_mgp)
# networks_transition_gen <- c(2, 2, NA, 7)
# networks_transition_c <- c(2/14, 2/12, NA, 7/25)
network_names <- list("balsa", "pinon", "mouse lung WT", "mouse lung ALK1", "mouse lung MGP")
network_ids <- list("01", "01", "01", "01", "01")

## Method for piecewise mse.function
for(i in 1:length(networks)){
    print(i)
    N <- floor(log(x = sum(is.na(networks[[i]]$n)), base = 2)) # use this value of N for back estimate from tip number.
    # N <- NA # use this value of N for strahler/brummer generation labelling
    tab_row <- c(network_names[[i]], network_ids[[i]], mse_function(treeDF = networks[[i]], N = N, model = "symmetric", method = method)[1:4], mse_function(treeDF = networks[[i]], N = N, model = 'asymmetric', method = method), N)
    mse_heatmap_tab <- rbind(mse_heatmap_tab, tab_row)
}


## Method for non-piecewise mse.sym.plus.error.function.
# for(i in 1:length(networks)){
#   print(i)
#   `tab_row <- c(network_names[[i]], network_ids[[i]], mse.sym.plus.error(networks[[i]], method), mse.asym.plus.error(networks[[i]], method))
#   mse_heatmap_tab <- rbind(mse_heatmap_tab, tab_row)
# }


## Repeated individuals.  human head and torso first.
# hht_transition_gen <- c(8, rep(NA,3), 2, rep(NA,7), 2, rep(NA,5))
# hht_transition_c <- c(8/12, rep(NA,3), 2/12, rep(NA,7), 2/7, rep(NA,5))

## Comment this block in/out for merging htt individuals along with sub_table and tab_row lines inside loop.
# spcs <- "hht"
# sub_table <- hht
# mse_row <- c(mse.sym.plus.error(sub_table, method), mse.asym.plus.error(sub_table, method))

## Method for piecewise mse_fucntion.
for(i in 1:length(levels(hht$indv))){
    spcs <- "hht"
    indv <- sprintf("%02d", i)
    print(indv)
    sub_table <- hht[which(hht$indv == levels(hht$indv)[i]),]
    N <- floor(log(x = sum(is.na(sub_table$n)), base = 2)) # use this value of N for back estimate from tip number.
    # N <- NA # use this value of N for strahler/brummer generation labelling
    tab_row <- c(spcs, indv, mse_function(treeDF = sub_table, N = N, model = "symmetric", method = method)[1:4], mse_function(treeDF = sub_table, N = N, model = 'asymmetric', method = method), N)
    # tab_row <- c(spcs, indv, mse_row)
    mse_heatmap_tab <- rbind(mse_heatmap_tab, tab_row)
}

## Method for non-piecewise mse.sym.plus.error.function.
# for(i in 1:length(levels(hht$indv))){
#   spcs <- "hht"
#   indv <- sprintf("%02d", i)
#   print(indv)
#   sub_table <- hht[which(hht$indv == levels(hht$indv)[i]),]
#   tab_row <- c(spcs, indv, mse.sym.plus.error(sub_table, method), mse.asym.plus.error(sub_table, method))
#   # tab_row <- c(spcs, indv, mse_row)
#   mse_heatmap_tab <- rbind(mse_heatmap_tab, tab_row)
# }


## Repeated individuals.  ponderosa
# pond_transition_gen <- c(rep(NA, 5))
# pond_transition_c <- c(rep(NA, 5))

## Comment this block in/out for merging pond individuals along with sub_table and tab_row lines inside loop.
# spcs <- "pond"
# sub_table <- pond
# mse_row <- c(mse.sym.plus.error(sub_table, method), mse.asym.plus.error(sub_table, method))

pond_ind <- c(3, 5, 6, 7, 16)
for(i in 1:length(levels(pond$indv))){
    spcs <- "ponderosa"
    indv <- sprintf("%02d", pond_ind[i])
    print(indv)
    sub_table <- pond[which(pond$indv == levels(pond$indv)[i]),]
    N <- floor(log(x = sum(is.na(sub_table$n)), base = 2)) # use this value of N for back estimate from tip number.
    # N <- NA # use this value of N for strahler/brummer generation labelling
    tab_row <- c(spcs, indv, mse_function(treeDF = sub_table, N = N, model = "symmetric", method = method)[1:4], mse_function(treeDF = sub_table, N = N, model = 'asymmetric', method = method), N)
    # tab_row <- c(spcs, indv, mse_row)
    mse_heatmap_tab <- rbind(mse_heatmap_tab, tab_row)
}

## Method for non-piecewise mse.sym.plus.error function.
# pond_ind <- c(3, 5, 6, 7, 16)
# for(i in 1:length(levels(pond$indv))){
#   spcs <- "ponderosa"
#   indv <- sprintf("%02d", pond_ind[i])
#   print(indv)
#   sub_table <- pond[which(pond$indv == levels(pond$indv)[i]),]
#   tab_row <- c(spcs, indv, mse.sym.plus.error(sub_table, method), mse.asym.plus.error(sub_table, method))
#   # tab_row <- c(spcs, indv, mse_row)
#   mse_heatmap_tab <- rbind(mse_heatmap_tab, tab_row)
# }

## Repeated individuals, treetips
# treetips_transition_gen <- c(rep(NA, 31))
# treetips_transition_c <- c(rep(NA, 31))

## method for piecewise mse_function
for(i in 1:length(levels(treetips$id))){
    spcs <- paste(unique(treetips$spcs[which(treetips$id == levels(treetips$id)[i])]))
    indv <- levels(treetips$id)[i]
    print(indv)
    sub_table <- treetips[which(treetips$id == levels(treetips$id)[i]),]
    # sub_table <- treetips[which(treetips$spcs == spcs),]
    N <- floor(log(x = sum(is.na(sub_table$n)), base = 2)) # use this value of N for back estimate from tip number.
    # N <- NA # use this value of N for strahler/brummer generation labelling
    tab_row <- c(spcs, indv, mse_function(treeDF = sub_table, N = N, model = "symmetric", method = method)[1:4], mse_function(treeDF = sub_table, N = N, model = 'asymmetric', method = method), N)
    mse_heatmap_tab <- rbind(mse_heatmap_tab, tab_row)
}


## Method for non-piecewise mse.sym.plus.error.function
# for(i in 20:length(levels(treetips$id))){
#   spcs <- paste(unique(treetips$spcs[which(treetips$id == levels(treetips$id)[i])]))
#   indv <- levels(treetips$id)[i]
#   print(indv)
#   sub_table <- treetips[which(treetips$id == levels(treetips$id)[i]),]
#   # sub_table <- treetips[which(treetips$spcs == spcs),]
#   tab_row <- c(spcs, indv, mse.sym.plus.error(sub_table, method), mse.asym.plus.error(sub_table, method))
#   mse_heatmap_tab <- rbind(mse_heatmap_tab, tab_row)
# }


for(i in 1:length(levels(root$indv))){
    spcs <- "root"
    indv <- levels(root$indv)[i]
    print(indv)
    sub_table <- root[which(root$indv == levels(root$indv)[i]),]
    N <- floor(log(x = sum(is.na(sub_table$n)), base = 2)) # use this value of N for back estimate from tip number.
    # N <- NA # use this value of N for strahler/brummer generation labelling
    if((sub_table$n[1] == 2) & !is.na(sub_table$n[1])){
        tab_row <- c(spcs, indv, mse_function(treeDF = sub_table, N = N, model = "symmetric", method = method)[1:4], mse_function(treeDF = sub_table, N = N, model = 'asymmetric', method = method), N)
        mse_heatmap_tab <- rbind(mse_heatmap_tab, tab_row)
    }
}


setwd("/Users/alexwork/odrive/Dropbox/Research/plant_animal_vasculature_comparison/tables/filtered_3sigma_outliers_piecewise")

write.csv(mse_heatmap_tab,file = paste("mse_heatmap_table_funcmean_log2_", method,".csv", sep = ""))


#####################   mse_function.R

## This file contains a list of functions necessary for calculating metabolic scaling exponent values based on the piecewise continuous exact expressions.  We will write one function that will toggle between symmetric and asymmetric models and which piece wise zones to be used.

mse_function <- function(treeDF, N = NA, model = "symmetric", method = "geometric"){
    
    source("/Users/alexwork/odrive/Dropbox/Research/plant_animal_vasculature_comparison/R_code/synthesized/functions/outlier_filter_transform.R")
    source("/Users/alexwork/odrive/Dropbox/Research/plant_animal_vasculature_comparison/R_code/synthesized/functions/single_mean_calc.R")
    
    trait.axes <- c("beta.ave", "beta.diff", "gamma.ave", "gamma.diff")
    temp <- na.omit(outlier.filter(treeDF, fcol = trait.axes)[,trait.axes])
    
    ## Check if N is provided, if not the use first entry in treeDF table.
    if(is.na(N)){
        N <- treeDF$generation[1]
    }
    
    ## First we will calculate the volume scale factor and variance in it's value based on whether we are using symmetric or asymmetric models.  These measures will then be passed onto a second part of the function that will calculate te mteabolic scaling exponent.
    
    if(model == "symmetric"){
        ## Here is where we calculate the volume scale factor using the symetric WBE model.  This value will be used to determine which region of the piecewise function we are using.  We will also calculate the error in the value of the volume scale factor.  These values will be passed onto a later function that actually calculates the metbolic scale factor.
        if(method == "geometric"){
            beta <- single.mean.calc(c(temp$beta.ave + temp$beta.diff, temp$beta.ave - temp$beta.diff))
            gamma <- single.mean.calc(c(temp$gamma.ave + temp$gamma.diff, temp$gamma.ave - temp$gamma.diff))
            
            beta.dev <- sqrt(log(10)*beta*var(log.transform(c(temp$beta.ave + temp$beta.diff, temp$beta.ave - temp$beta.diff)), na.rm = TRUE))
            gamma.dev <- sqrt(log(10)*gamma*var(log.transform(c(temp$gamma.ave + temp$gamma.diff, temp$gamma.ave - temp$gamma.diff)), na.rm = TRUE))
        }else if(method == "arithmetic"){
            beta <- mean(c(temp$beta.ave + temp$beta.diff, temp$beta.ave - temp$beta.diff), na.rm = T)
            gamma <- mean(c(temp$gamma.ave + temp$gamma.diff, temp$gamma.ave - temp$gamma.diff), na.rm = T)
            
            beta.dev <- sqrt(var(c(temp$beta.ave + temp$beta.diff, temp$beta.ave - temp$beta.diff), na.rm = T))
            gamma.dev <- sqrt(var(c(temp$gamma.ave + temp$gamma.diff, temp$gamma.ave - temp$gamma.diff), na.rm = T))
        }
        
        vol.fac <- 2*beta**2*gamma
        dvol.dbeta <- 4*beta*gamma
        dvol.dgamma <- 2*beta**2
        sigma.vol.sq <- dvol.dbeta**2*beta.dev**2 + dvol.dgamma**2*gamma.dev**2
        
    }
    
    if(model == "asymmetric"){
        ## Here is where we calculate the volume scale fcator using the asymetric WBE model.  This value will be used to determine which region of the piecewise function we are using.  We will also calculate the error in the value of the volume scale factor.  These values will be passed onto a later function that actually calculates the metbolic scale factor.
        
        if(method == "geometric"){
            beta.ave <- single.mean.calc(temp[,1])
            beta.diff <- single.mean.calc(temp[,2])
            gamma.ave <- single.mean.calc(temp[,3])
            gamma.diff <- single.mean.calc(temp[,4])
            
            beta.ave.dev <- sqrt(log(10)*beta.ave*var(log.transform(temp[,1]), na.rm = TRUE))
            beta.diff.dev <- sqrt(log(10)*abs(beta.diff)*var(log.transform(temp[,2]), na.rm = TRUE))
            gamma.ave.dev <- sqrt(log(10)*gamma.ave*var(log.transform(temp[,3]), na.rm = TRUE))
            gamma.diff.dev <- sqrt(log(10)*abs(gamma.diff)*var(log.transform(temp[,4]), na.rm = TRUE))
        }else if(method == "arithmetic"){
            beta.ave <- mean(temp[,1], na.rm = T)
            beta.diff <- mean(temp[,2], na.rm = T)
            gamma.ave <- mean(temp[,3], na.rm = T)
            gamma.diff <- mean(temp[,4], na.rm = T)
            
            beta.ave.dev <- sqrt(var(temp[,1], na.rm = T))
            beta.diff.dev <- sqrt(var(temp[,2], na.rm = T))
            gamma.ave.dev <- sqrt(var(temp[,3], na.rm = T))
            gamma.diff.dev <- sqrt(var(temp[,4], na.rm = T))
        }
        
        vol.fac <- 2*beta.ave**2*gamma.ave + 4*beta.ave*beta.diff*gamma.diff + 2*gamma.ave*beta.diff**2
        dvol.dbeta.ave <- 4*beta.ave*gamma.ave + 4*beta.diff*gamma.diff
        dvol.dbeta.diff <- 4*beta.ave*gamma.diff + 4*gamma.ave*beta.diff
        dvol.dgamma.ave <- 2*beta.ave**2 + 2*beta.diff**2
        dvol.dgamma.diff <- 4*beta.ave*beta.diff
        sigma.vol.sq <- dvol.dbeta.ave**2*beta.ave.dev**2 + dvol.dbeta.diff**2*beta.diff.dev**2 + dvol.dgamma.ave**2*gamma.ave.dev**2 + dvol.dgamma.diff**2*gamma.diff.dev**2
        
    }
    
    if((vol.fac > 0.999) & (vol.fac < 1.001)){
        ## Here we calculate metabolic scaling exponent and variance in estimate for case where volume fraction is near to unity.
        
        theta <- log(2**N)/(log(2**N) + log((N+1)/vol.fac**N))
        dtheta.dvol <- (theta**2/log(2**N))*(N/vol.fac)
        
    }else{
        ## Here we calculate metabolic scaling exponent and variance in estaimte for case where volume fraction is not near to unity.
        
        theta <- log(2**N)/(log(2**N) + log((1 - 1/vol.fac**(N+1))/(1 - 1/vol.fac)))
        dtheta.dvol <- (theta**2/log(2**N))*((1/vol.fac**2 - 1/vol.fac**(N+2) - N*(1/vol.fac**(N+2) - 1/vol.fac**(N+3)))/((1 - 1/vol.fac)*(1 - 1/vol.fac**(N+1))))
        
    }
    
    ## Here we calculate the standard deviation for later return.
    theta.dev <- sqrt(dtheta.dvol**2*sigma.vol.sq)
    
    if(model == "symmetric"){
        return(c(theta, theta.dev, theta.dev, vol.fac))
    }else if(model == "asymmetric"){
        return(c(theta, theta.dev, theta.dev, vol.fac, beta.ave, beta.diff, gamma.ave, gamma.diff))
    }
}


####################    mse_models_vs_regression_final_figure_fancy_characters.R

### NEW CODE  This is working code to replot the mse models vs regression graph, but using AS Tips and GS Tips as two of the groups, and changing the point characters to serve as a legend for the ensuing characters in the rest of the figure (this will be a subfigure).


### This is working code to produce the final version of the metabolic scaling methods comparison figure.  Needs the following fixes:  (i) Restructure the plotting code to be based off of that found in mse_corrections_plotting.R so that we can include pretty error bars; (ii) Need to add roots to the plot, as well as calculating the Roots global asymmetry value.  Might have to be done seperately and input manually as Delta is caluclated in the regression_scaling script, which can not be done for the roots data;


library("ggplot2")
library("RColorBrewer")
library("colorRamps")

### First we plot the comparison against the tip vs. volume regression-based values. ####

setwd("/Users/alexwork/odrive/Dropbox/Research/plant_animal_vasculature_comparison/tables/filtered_3sigma_outliers_piecewise/")
dir()

### Here we read in the neded data tables and restructure them slightly for easier graphing. ####

mse_funcmean_geom_tab <- read.csv(file = "mse_heatmap_table_funcmean_log2_geometric.csv", header = TRUE, na.strings = c("NaN", "NA"))[,-1]

vol_tip_tab <- read.csv(file = "volume_tip_scaling.csv", header = TRUE)[,-1]
reg_groups <- c(rep("hht", 18), "mouse lung WT", "mouse lung alk1", "mouse lung mgp", "balsa", "pinon", rep("ponderosa", 5), rep("GS Tips", 5), rep("AS Tips", 15), rep("GS Tips", 11))
vol_tip_tab <- data.frame(vol_tip_tab, "Groups" = reg_groups)


names(mse_funcmean_geom_tab)[c(3:5, 7:9)] <- c("sym", "sym_err_low", "sym_err_up", "asym", "asym_err_low", "asym_err_up")


## Run next line to remove GM mouse lungs.
mse_funcmean_geom_tab <- mse_funcmean_geom_tab[-c(4,5), ]

## Run next line to add a column of groups to the mse_funcmean_geom_tab.  We are going to sort through this column instead of the species column.  The only difference is the use of AS Tips and GS Tips instead of the species names for the respective tips species.
Groups <- c("balsa", "pinon", "mouse lung WT", rep("hht", 18), rep("ponderosa", 5), rep("GS Tips", 5), rep("AS Tips", 15), rep("GS Tips", 11), rep("root", 231))

mse_funcmean_geom_tab <- data.frame(mse_funcmean_geom_tab, "Groups" = Groups)


species <- rep(c("hht", "mouse lung WT", "balsa", "pinon", "ponderosa", "dougfir", "maple", "oak", "robinia", "whitefir", "whitepine", "root"),3)
groups <- rep(c("hht", "mouse lung WT", "balsa", "pinon", "ponderosa", "AS Tips", "GS Tips", "root"), 3)

methods <- c(rep("reg", 8), rep("sym",8), rep("asym",8))
err_low <- mat.or.vec(24,1)
err_up <- mat.or.vec(24,1)
mse <- mat.or.vec(24,1)
delta <- mat.or.vec(24,1)
# methods_gen <- c(rep("reg", 12), rep("func of mean", 36), rep("mean of func", 48))
# grouplab <- paste(methods_gen, methods, sep = " ")
# grouplab <- factor(grouplab, levels = c("func of mean sym", "func of mean asym", "func of mean tran",
# "mean of func arith", "mean of func geom", "mean of func hier_arith", "mean of func hier_geom", "reg reg"))

mse_table <- data.frame("groups" = groups, "methods" = methods, "mse" = mse, "err_low" = err_low, "err_up" = err_up, "delta" = delta)


for(i in unique(groups)){
    print(i)
    mse_table[which((mse_table$groups == i) & (mse_table$methods == "reg")),]$mse <- mean(vol_tip_tab$Slope[which(vol_tip_tab$Groups == i)], na.rm = T)
    mse_table[which((mse_table$groups == i) & (mse_table$methods == "reg")),]$err_low <- mean(vol_tip_tab$CI[which(vol_tip_tab$Groups == i)], na.rm = T)
    mse_table[which((mse_table$groups == i) & (mse_table$methods == "reg")),]$err_up <- mean(vol_tip_tab$CI[which(vol_tip_tab$Groups == i)], na.rm = T)
}

for(i in unique(groups)){
    for(j in unique(methods)){
        mse_table[which((mse_table$groups == i) & (mse_table$methods == j)),]$delta <- mean(vol_tip_tab$Delta[which(vol_tip_tab$Groups == i)], na.rm = T)
    }
}

for(i in unique(groups)){
    for(j in c("sym", "asym")){
        mse_table[which((mse_table$groups == i) & (mse_table$methods == j)),]$mse <- mean(mse_funcmean_geom_tab[which(mse_funcmean_geom_tab$Groups == i),which(colnames(mse_funcmean_geom_tab) == j)], na.rm = T)
        mse_table[which((mse_table$groups == i) & (mse_table$methods == j)),]$err_low <- mean(mse_funcmean_geom_tab[which(mse_funcmean_geom_tab$Groups == i),which(colnames(mse_funcmean_geom_tab) == paste(j, "_err_low", sep = ""))], na.rm = T)
        mse_table[which((mse_table$groups == i) & (mse_table$methods == j)),]$err_up <- mean(mse_funcmean_geom_tab[which(mse_funcmean_geom_tab$Groups == i),which(colnames(mse_funcmean_geom_tab) == paste(j, "_err_up", sep = ""))], na.rm = T)
    }
}


# ### Insert here manual calculation of delta for roots.
#
# setwd("/Users/alexwork/odrive/Dropbox/Research/plant_animal_vasculature_comparison/datasets/masters")
#
# root <- read.csv("root_master.csv", header = T)[,-1]
#
# single.mean.calc <- function(vec){
#   ## This subroutine is used to translate and transform data, calculate a mean value, thne transform and translate back the mean.
#   translate <- min(vec)
#   if(translate <= 0){
#     vec <- vec - 2*translate + 10
#     vec.ave <- 10^(mean(log10(vec))) - 10 + 2*translate
#     return(vec.ave)
#   } else if(translate > 0){
#     vec.ave <- 10^(mean(log10(vec)))
#     return(vec.ave)
#   }
# }
#
# asym_measure <- function(treeDF){
#   ## This function calculates a gross metric for global asymmetry that can be used to characterize networks and rank them.
#   delta <- mat.or.vec(length(treeDF$beta.ave), 1)
#   for(i in 1:length(delta)){
#     delta[i] <- sqrt((treeDF$beta.diff[i]/treeDF$beta.ave[i])**2 + (treeDF$gamma.diff[i]/treeDF$gamma.ave[i])**2)
#   }
#   return(data.frame(treeDF, "delta" = delta))
# }
#
# mse_table[which(mse_table$species == "root"), which(colnames(mse_table) == "delta")] <- single.mean.calc(na.omit(asym_measure(root)$delta))
#
#
#
# ## Reorder levels of species by global asymmetry factor.
#
# neworder <- c()
# for(i in 1:length(levels(mse_table$species))){
#   neworder <- c(neworder, unique(mse_table$species[which(mse_table$delta == levels(factor(mse_table$delta))[i])]))
# }
#
# mse_table$species <- factor(mse_table$species, levels = levels(mse_table$species)[neworder])


# mse_table$species <- factor(mse_table$species, levels = c("balsa", "root", "maple", "oak", "robinia", "whitepine", "whitefir", "dougfir", "ponderosa", "pinon", "mouse lung WT", "hht"))

mse_table$groups <- factor(mse_table$groups, levels = c("balsa", "root", "AS Tips", "GS Tips", "ponderosa", "pinon", "mouse lung WT", "hht"))


levels(mse_table$groups)

SpeciesNames <- c("Balsa", "Roots", "AS Tips", "GS Tips", "Ponderosa", "Pinon", "Mouse lung", "HHT")

############# Modify names for up and low error#############
Columnnames <- c("Symmetric WBE", "Sym Err Low", "Sym Err Up", "Asymmetric WBE", "Asym Err Low", "Asym Err Up", "Regression", "Reg Err Low", "Reg Err Up")

mse_table_for_plot <- mat.or.vec(8,9)
rownames(mse_table_for_plot) <- SpeciesNames
colnames(mse_table_for_plot) <- Columnnames

for(i in 1:length(levels(mse_table$groups))){
    mse_table_for_plot[i,1] <- mse_table$mse[which((mse_table$groups == levels(mse_table$groups)[i]) & (mse_table$methods == "sym"))]
    mse_table_for_plot[i,2] <- mse_table$err_low[which((mse_table$groups == levels(mse_table$groups)[i]) & (mse_table$methods == "sym"))]
    mse_table_for_plot[i,3] <- mse_table$err_up[which((mse_table$groups == levels(mse_table$groups)[i]) & (mse_table$methods == "sym"))]
    mse_table_for_plot[i,4] <- mse_table$mse[which((mse_table$groups == levels(mse_table$groups)[i]) & (mse_table$methods == "asym"))]
    mse_table_for_plot[i,5] <- mse_table$err_low[which((mse_table$groups == levels(mse_table$groups)[i]) & (mse_table$methods == "asym"))]
    mse_table_for_plot[i,6] <- mse_table$err_up[which((mse_table$groups == levels(mse_table$groups)[i]) & (mse_table$methods == "asym"))]
    mse_table_for_plot[i,7] <- mse_table$mse[which((mse_table$groups == levels(mse_table$groups)[i]) & (mse_table$methods == "reg"))]
    mse_table_for_plot[i,8] <- mse_table$err_low[which((mse_table$groups == levels(mse_table$groups)[i]) & (mse_table$methods == "reg"))]
    mse_table_for_plot[i,9] <- mse_table$err_up[which((mse_table$groups == levels(mse_table$groups)[i]) & (mse_table$methods == "reg"))]
}

mse_table_for_plot[2, c(7:9)] <- NA

mse_table_for_plot <- data.frame(mse_table_for_plot)

############# Modify names for up and low error#############
names(mse_table_for_plot) <- c("Symmetric WBE", "Sym Err Low", "Sym Err Up", "Asymmetric WBE", "Asym Err Low", "Asym Err Up", "Regression", "Reg Err Low", "Reg Err Up")

xloc <- c(seq(0.85, 7.85, 1), seq(1, 8, 1), seq(1.15, 8.15, 1))
yloc <- c(mse_table_for_plot$`Symmetric WBE`, mse_table_for_plot$`Asymmetric WBE`, mse_table_for_plot$`Regression`)
############ Modify err for err_up and err_low #############
err_low <- c(mse_table_for_plot$`Sym Err Low`, mse_table_for_plot$`Asym Err Low`, mse_table_for_plot$`Reg Err Low`)
err_up <- c(mse_table_for_plot$`Sym Err Up`, mse_table_for_plot$`Asym Err Up`, mse_table_for_plot$`Reg Err Up`)

png(filename = "/Users/alexwork/Desktop/mse_corrections_figure.png", width = 6, height = 4, units = "in", res = 300)

op <- par(mar=c(5,4,1,1))
plot(x = xloc, y = yloc, pch = c(rep(c(0, 7, 2, 6, 5, 1, 3, 4),3)), lwd = 2, bg = c(rep('#66c2a5', 8), rep('#fc8d62', 8), rep('#8da0cb',8)), col = c(rep('#66c2a5', 8), rep('#fc8d62', 8), rep('#8da0cb',8)), cex = 1.2, xlim = c(0.5, 8.5), ylim = c(0.3, 1.1), axes = F, ylab = NA, xlab = NA)

# , main = "Filtered 3-sigma, Arithmetically Averaged, \n  Piecewise MSE, Weighted Generation"
## Adding Error Bars

############  Modify segments use of err for err_up and err_low  #########
segments(xloc,yloc-err_low,xloc,yloc+err_up, lty = 3)
epsilon <- 0.1
segments(xloc-epsilon,yloc-err_low,xloc+epsilon,yloc-err_low)
segments(xloc-epsilon,yloc+err_up,xloc+epsilon,yloc+err_up)
box()
# axis(side = 1, at = seq(1, 12, 1), labels = rownames(mse_table_for_plot), tck = -0.01, las = 2)
axis(side = 1, at = seq(1,8,1), labels = FALSE)
# text(x = seq(1,8,1), y = -0.1, labels = unique(rownames(mse_table_for_plot)), xpd = TRUE, cex = 0.85)
text(x=seq(1,8,1), y=par()$usr[3]-0.075*(par()$usr[4]-par()$usr[3]),
labels=unique(rownames(mse_table_for_plot)), srt=30, adj=c(0.5,1), xpd=TRUE, cex = 1.2)
# text(x = c(1.5, 4.5, 8), y = -0.325, labels = c("Angiosperms", "Gymnosperms", "Mammals"),  srt = 0, adj = 1, xpd = TRUE)
# mtext(side = 1, text = "Network", cex = 1, line = 4.00)
# axis(side = 2, las = 1, labels = FALSE)
axis(side = 2, at = seq(0.4, 1, 0.2), labels = FALSE)
text(x = -0.25, y = seq(0.4, 1, 0.2), labels = c("0.4", "0.6", "0.8", "1.0"), xpd = TRUE, cex = 1)
mtext(side = 2, text = expression(paste("Metabolic Scaling Exponent ", (theta))), cex = 1.2, line = 2)
legend("top", legend = c("Symmetric WBE", "Asymmetric WBE", "Regression"), pch = c(22, 22, 22), pt.bg = c('#66c2a5','#fc8d62','#8da0cb'), col = c('#66c2a5','#fc8d62','#8da0cb'), pt.cex = 1, ncol = 3, bty = 'n', cex = 1.0)
abline(h = 0.75, lty = 2, lwd = 2)
# par(op)

dev.off()


####################    mse_plus_error_funcs.R

## This file contains a list of functions necessary for calculating mse values for wbe, wbbe.asym, error values for both functions, and means and standard deviations in the input scale factor variables.

mse.wbe <- function(beta, gamma){
    return(log(2)/(log(2) - log((beta)**2*(gamma) + (beta)**2*(gamma))))
}

mse.asym <- function(beta, deltabeta, gamma, deltagamma){
    return(log(2)/(log(2) - log((beta + deltabeta)**2*(gamma + deltagamma) + (beta - deltabeta)**2*(gamma - deltagamma))))
}

mse.transition <- function(beta.mean.great, beta.diff.great, gamma.mean.great, gamma.diff.great, beta.mean.less, beta.diff.less, gamma.mean.less, gamma.diff.less, c){
    return(log(2)/(log(2) + (-c)*log((beta.mean.great + beta.diff.great)**2*(gamma.mean.great + gamma.diff.great) + (beta.mean.great - beta.diff.great)**2*(gamma.mean.great - gamma.diff.great)) - (1-c)*log((beta.mean.less + beta.diff.less)**2*(gamma.mean.less + gamma.diff.less) + (beta.mean.less - beta.diff.less)**2*(gamma.mean.less - gamma.diff.less))))
}

mse.wbe.error <- function(beta, gamma, betadev, gammadev){
    return(sqrt(((2*mse.wbe(beta,gamma)^2)/(log(2)*beta))^2*betadev^2
    + ((mse.wbe(beta,gamma)^2)/(log(2)*gamma))^2*gammadev^2))
}

denom1 <- function(beta, deltabeta, gamma, deltagamma){
    return(1 + (2*deltabeta*deltagamma)/(beta*gamma) + deltabeta^2/beta^2)
}

mse.asym.error <- function(beta, deltabeta, gamma, deltagamma, betadev, deltabetadev, gammadev, deltagammadev){
    return(sqrt(((2*mse.asym(beta, deltabeta, gamma, deltagamma)^2)*(1 + (deltabeta*deltagamma)/(beta*gamma))/(log(2)*beta*denom1(beta,deltabeta,gamma,deltagamma)))^2*betadev^2
    + ((mse.asym(beta, deltabeta, gamma, deltagamma)^2*((2*deltabeta*deltagamma)/(beta*gamma) + (2*deltabeta^2)/(beta^2)))/(log(2)*deltabeta*denom1(beta,deltabeta,gamma,deltagamma)))^2*deltabetadev^2
    + ((mse.asym(beta,deltabeta,gamma,deltagamma)^2*(1 + deltabeta^2/beta^2))/(log(2)*gamma*denom1(beta,deltabeta,gamma,deltagamma)))^2*gammadev^2
    + ((mse.asym(beta,deltabeta,gamma,deltagamma)^2*((2*deltabeta*deltagamma)/(beta*gamma)))/(log(2)*deltagamma*denom1(beta,deltabeta,gamma,deltagamma)))^2*deltagammadev^2))
}

mse.tran.error <- function(beta.mean.great, beta.diff.great, gamma.mean.great, gamma.diff.great, beta.mean.less, beta.diff.less, gamma.mean.less, gamma.diff.less, bmgdev, bdgdev, gmgdev, gdgdev, bmldev, bdldev, gmldev, gdldev, c){
    mse <- mse.transition(beta.mean.great, beta.diff.great, gamma.mean.great, gamma.diff.great, beta.mean.less, beta.diff.less, gamma.mean.less, gamma.diff.less, c)
    return(sqrt((mse^2/log(2))*(((c-1)*(2*(beta.mean.great + beta.diff.great)*(gamma.mean.great + gamma.diff.great) + 2*(beta.mean.great - beta.diff.great)*(gamma.mean.great - gamma.diff.great))/((beta.mean.great + beta.diff.great)^2*(gamma.mean.great + gamma.diff.great) + (beta.mean.great - beta.diff.great)^2*(gamma.mean.great - gamma.diff.great)))^2*bmgdev^2
    + ((c-1)*(2*(beta.mean.great + beta.diff.great)*(gamma.mean.great + gamma.diff.great) - 2*(beta.mean.great - beta.diff.great)*(gamma.mean.great - gamma.diff.great))/((beta.mean.great + beta.diff.great)^2*(gamma.mean.great + gamma.diff.great) + (beta.mean.great - beta.diff.great)^2*(gamma.mean.great - gamma.diff.great)))^2*bdgdev^2
    + ((c-1)*((beta.mean.great + beta.diff.great)^2 + (beta.mean.great - beta.diff.great)^2)/((beta.mean.great + beta.diff.great)^2*(gamma.mean.great + gamma.diff.great) + (beta.mean.great - beta.diff.great)^2*(gamma.mean.great - gamma.diff.great)))^2*gmgdev^2
    + ((c-1)*((beta.mean.great + beta.diff.great)^2 - (beta.mean.great - beta.diff.great)^2)/((beta.mean.great + beta.diff.great)^2*(gamma.mean.great + gamma.diff.great) + (beta.mean.great - beta.diff.great)^2*(gamma.mean.great - gamma.diff.great)))^2*gdgdev^2
    + (c*(2*(beta.mean.less + beta.diff.less)*(gamma.mean.less + gamma.diff.less) + 2*(beta.mean.less - beta.diff.less)*(gamma.mean.less - gamma.diff.less))/((beta.mean.less + beta.diff.less)^2*(gamma.mean.less + gamma.diff.less) + (beta.mean.less - beta.diff.less)^2*(gamma.mean.less - gamma.diff.less)))^2*bmldev^2
    + (c*(2*(beta.mean.less + beta.diff.less)*(gamma.mean.less + gamma.diff.less) - 2*(beta.mean.less - beta.diff.less)*(gamma.mean.less - gamma.diff.less))/((beta.mean.less + beta.diff.less)^2*(gamma.mean.less + gamma.diff.less) + (beta.mean.less - beta.diff.less)^2*(gamma.mean.less - gamma.diff.less)))^2*bdldev^2
    + (c*((beta.mean.less + beta.diff.less)^2 + (beta.mean.less - beta.diff.less)^2)/((beta.mean.less + beta.diff.less)^2*(gamma.mean.less + gamma.diff.less) + (beta.mean.less - beta.diff.less)^2*(gamma.mean.less - gamma.diff.less)))^2*gmldev^2
    + (c*((beta.mean.less + beta.diff.less)^2 - (beta.mean.less - beta.diff.less)^2)/((beta.mean.less + beta.diff.less)^2*(gamma.mean.less + gamma.diff.less) + (beta.mean.less - beta.diff.less)^2*(gamma.mean.less - gamma.diff.less)))^2*gdldev^2)))
}

mse.sym.plus.error <- function(treeDF, method){
    
    trait.axes <- c("beta.ave", "beta.diff", "gamma.ave", "gamma.diff")
    
    ## Now build two new columns of vectors for beta.wbe and gamma.wbe.
    if(method == "geometric"){
        
        temp <- na.omit(outlier.filter(treeDF, fcol = trait.axes)[,trait.axes])
        
        beta.wbe.mean <- single.mean.calc(c(temp$beta.ave + temp$beta.diff, temp$beta.ave - temp$beta.diff))
        gamma.wbe.mean <- single.mean.calc(c(temp$gamma.ave + temp$gamma.diff, temp$gamma.ave - temp$gamma.diff))
        
        beta.wbe.stdev <- sqrt(log(10)*beta.wbe.mean*var(log.transform(c(temp$beta.ave + temp$beta.diff, temp$beta.ave - temp$beta.diff)), na.rm = TRUE))
        gamma.wbe.stdev <- sqrt(log(10)*gamma.wbe.mean*var(log.transform(c(temp$gamma.ave + temp$gamma.diff, temp$gamma.ave - temp$gamma.diff)), na.rm = TRUE))
        
        mse_sym <- mse.wbe(beta.wbe.mean,gamma.wbe.mean)
        mse_sym_err_low <- mse.wbe.error(beta.wbe.mean, gamma.wbe.mean, beta.wbe.stdev, gamma.wbe.stdev)
        mse_sym_err_up <- mse.wbe.error(beta.wbe.mean, gamma.wbe.mean, beta.wbe.stdev, gamma.wbe.stdev)
        
    }
    else if(method == "arithmetic"){
        
        temp <- na.omit(outlier.filter(treeDF, fcol = trait.axes)[,trait.axes])
        
        beta.wbe.mean <- mean(c(temp$beta.ave + temp$beta.diff, temp$beta.ave - temp$beta.diff), na.rm = T)
        gamma.wbe.mean <- mean(c(temp$gamma.ave + temp$gamma.diff, temp$gamma.ave - temp$gamma.diff), na.rm = T)
        
        beta.wbe.stdev <- sqrt(var(c(temp$beta.ave + temp$beta.diff, temp$beta.ave - temp$beta.diff), na.rm = T))
        gamma.wbe.stdev <- sqrt(var(c(temp$gamma.ave + temp$gamma.diff, temp$gamma.ave - temp$gamma.diff), na.rm = T))
        
        mse_sym <- mse.wbe(beta.wbe.mean,gamma.wbe.mean)
        mse_sym_err_low <- mse.wbe.error(beta.wbe.mean, gamma.wbe.mean, beta.wbe.stdev, gamma.wbe.stdev)
        mse_sym_err_up <- mse.wbe.error(beta.wbe.mean, gamma.wbe.mean, beta.wbe.stdev, gamma.wbe.stdev)
        
    }
    else if(strsplit(method, "_")[[1]][1] == "hierarchical"){
        library("mltools")
        
        if(strsplit(method, "_")[[1]][3] == "filter"){
            # Option for filtering data
            treeDF <- outlier.filter(treeDF, fcol = c("beta.ave", "beta.diff", "gamma.ave", "gamma.diff"))
        }
        
        treeDF_sort <- na.omit(treeDF[,c("diameter", "length", "beta.ave", "beta.diff", "gamma.ave", "gamma.diff")])
        
        if(strsplit(method, "_")[[1]][2] == "logarithmic"){
            # Option for logarithmic binning
            treeDF_sort$diameter <- log(treeDF_sort$diameter)
            treeDF_sort$length <- log(treeDF_sort$length)
        }
        
        # Here we define the hierarchical averaging function.
        
        hier_ave <- function(treeDF_sort, d){
            treeDF_sort <- treeDF_sort[d,]
            # Defining number of bins
            dia_bin_number <- ceiling(sqrt(length(treeDF_sort$diameter)))
            len_bin_number <- ceiling(sqrt(length(treeDF_sort$length)))
            # Define temporary data.frame for sorting/binning
            treeDF_sort <- data.frame(treeDF_sort, diameter_bins = bin_data(treeDF_sort$diameter, bins = dia_bin_number), length_bins = bin_data(treeDF_sort$length, bins = len_bin_number))
            # Initialize vectors for bin means
            beta_bin_means <- c()
            gamma_bin_means <- c()
            # Loop through diameter and length bins to search for corresponding scale factors and caluclate means within each bin
            for(i in 1:length(levels(treeDF_sort$diameter_bins))){
                dia_bin_rows <- which(treeDF_sort$diameter_bins == levels(treeDF_sort$diameter_bins)[i])
                betas <- c(treeDF_sort$beta.ave[dia_bin_rows] + treeDF_sort$beta.diff[dia_bin_rows], treeDF_sort$beta.ave[dia_bin_rows] - treeDF_sort$beta.diff[dia_bin_rows])
                beta_bin_means[i] <- mean(betas, na.rm = T)
            }
            
            for(i in 1:length(levels(treeDF_sort$length_bins))){
                len_bin_rows <- which(treeDF_sort$length_bins == levels(treeDF_sort$length_bins)[i])
                gammas <- c(treeDF_sort$gamma.ave[len_bin_rows] + treeDF_sort$gamma.diff[len_bin_rows], treeDF_sort$gamma.ave[len_bin_rows] - treeDF_sort$gamma.diff[len_bin_rows])
                gamma_bin_means[i] <- mean(gammas, na.rm = T)
            }
            
            beta.wbe.mean <- mean(beta_bin_means, na.rm = T)
            gamma.wbe.mean <- mean(gamma_bin_means, na.rm = T)
            return(c(mse.wbe(beta.wbe.mean,gamma.wbe.mean), beta.wbe.mean, gamma.wbe.mean))
        }
        
        ## This section runs the bootstrapping
        library("boot")
        # For reproducibility, set seed
        set.seed(1234)
        
        # Perform bootsampling.
        boot_test <- boot(data = treeDF_sort, statistic = hier_ave, R = 1000)
        
        # Estimate bootsample mean of symmetric mse value.
        mse_sym <- mean(boot_test[[2]][,1])
        
        # Estimate upper and lower confidence levels for 95%.
        mse_sym_err_low <- mse_sym - boot.ci(boot_test, type = "perc")[[4]][4]
        mse_sym_err_up <- boot.ci(boot_test, type = "perc")[[4]][5] - mse_sym
    }
    # return(c(mse.wbe(single.mean.calc(beta.wbe),single.mean.calc(gamma.wbe)),single.mean.calc(beta.wbe),single.mean.calc(gamma.wbe)))
    # return(c(mse.wbe(beta.wbe.mean,gamma.wbe.mean), mse.wbe.error(beta.wbe.mean, gamma.wbe.mean, beta.wbe.stdev, gamma.wbe.stdev)))
    return(c(mse_sym, mse_sym_err_low, mse_sym_err_up))
}
####################################################################################################################################

#### Error for asymmetric.

mse.asym.plus.error <- function(treeDF, method){
    
    trait.axes <- c("beta.ave", "beta.diff", "gamma.ave", "gamma.diff")
    temp <- na.omit(outlier.filter(treeDF, fcol = trait.axes)[,trait.axes])
    
    if(method == "geometric"){
        beta.mean <- single.mean.calc(temp[,1])
        beta.diff <- single.mean.calc(temp[,2])
        gamma.mean <- single.mean.calc(temp[,3])
        gamma.diff <- single.mean.calc(temp[,4])
        
        beta.mean.stdev <- sqrt(log(10)*beta.mean*var(log.transform(temp[,1]), na.rm = TRUE))
        beta.diff.stdev <- sqrt(log(10)*abs(beta.diff)*var(log.transform(temp[,2]), na.rm = TRUE))
        gamma.mean.stdev <- sqrt(log(10)*gamma.mean*var(log.transform(temp[,3]), na.rm = TRUE))
        gamma.diff.stdev <- sqrt(log(10)*abs(gamma.diff)*var(log.transform(temp[,4]), na.rm = TRUE))
        
        mse_asym <- mse.asym(beta.mean, beta.diff, gamma.mean, gamma.diff)
        mse_sym_err_low <- mse.asym.error(beta.mean, beta.diff, gamma.mean, gamma.diff, beta.mean.stdev, beta.diff.stdev, gamma.mean.stdev, gamma.diff.stdev)
        mse_sym_err_up <- mse.asym.error(beta.mean, beta.diff, gamma.mean, gamma.diff, beta.mean.stdev, beta.diff.stdev, gamma.mean.stdev, gamma.diff.stdev)
    }
    else if(method == "arithmetic"){
        beta.mean <- mean(temp[,1], na.rm = T)
        beta.diff <- mean(temp[,2], na.rm = T)
        gamma.mean <- mean(temp[,3], na.rm = T)
        gamma.diff <- mean(temp[,4], na.rm = T)
        
        beta.mean.stdev <- sqrt(var(temp[,1], na.rm = T))
        beta.diff.stdev <- sqrt(var(temp[,2], na.rm = T))
        gamma.mean.stdev <- sqrt(var(temp[,3], na.rm = T))
        gamma.diff.stdev <- sqrt(var(temp[,4], na.rm = T))
        
        mse_asym <- mse.asym(beta.mean, beta.diff, gamma.mean, gamma.diff)
        mse_sym_err_low <- mse.asym.error(beta.mean, beta.diff, gamma.mean, gamma.diff, beta.mean.stdev, beta.diff.stdev, gamma.mean.stdev, gamma.diff.stdev)
        mse_sym_err_up <- mse.asym.error(beta.mean, beta.diff, gamma.mean, gamma.diff, beta.mean.stdev, beta.diff.stdev, gamma.mean.stdev, gamma.diff.stdev)
    }
    else if(strsplit(method, "_")[[1]][1] == "hierarchical"){
        library("mltools")
        
        if(strsplit(method, "_")[[1]][3] == "filter"){
            # Option for filtering data
            treeDF <- outlier.filter(treeDF, fcol = c("beta.ave", "beta.diff", "gamma.ave", "gamma.diff"))
        }
        
        treeDF_sort <- na.omit(treeDF[,c("diameter", "length", "beta.ave", "beta.diff", "gamma.ave", "gamma.diff")])
        
        if(strsplit(method, "_")[[1]][2] == "logarithmic"){
            # Option for logarithmic binning
            treeDF_sort$diameter <- log(treeDF_sort$diameter)
            treeDF_sort$length <- log(treeDF_sort$length)
        }
        
        ## Here we define the hierarchical averaging function.
        
        hier_ave <- function(treeDF_sort, d){
            treeDF_sort <- treeDF_sort[d,]
            # Defining number of bins
            dia_bin_number <- ceiling(sqrt(length(treeDF_sort$diameter)))
            len_bin_number <- ceiling(sqrt(length(treeDF_sort$length)))
            # Define temporary data.frame for sorting/binning
            treeDF_sort <- data.frame(treeDF_sort, diameter_bins = bin_data(treeDF_sort$diameter, bins = dia_bin_number), length_bins = bin_data(treeDF_sort$length, bins = len_bin_number))
            # Initialize vectors for bin means
            beta_ave_bin_means <- c()
            beta_diff_bin_means <- c()
            gamma_ave_bin_means <- c()
            gamma_diff_bin_means <- c()
            # Loop through diameter and length bins to search for corresponding scale factors and caluclate means within each bin
            for(i in 1:length(levels(treeDF_sort$diameter_bins))){
                dia_bin_rows <- which(treeDF_sort$diameter_bins == levels(treeDF_sort$diameter_bins)[i])
                beta_ave_bin_means[i] <- mean(treeDF_sort$beta.ave[dia_bin_rows], na.rm = T)
                beta_diff_bin_means[i] <- mean(treeDF_sort$beta.diff[dia_bin_rows], na.rm = T)
            }
            
            for(i in 1:length(levels(treeDF_sort$length_bins))){
                len_bin_rows <- which(treeDF_sort$length_bins == levels(treeDF_sort$length_bins)[i])
                gamma_ave_bin_means[i] <- mean(treeDF_sort$gamma.ave[len_bin_rows], na.rm = T)
                gamma_diff_bin_means[i] <- mean(treeDF_sort$gamma.diff[len_bin_rows], na.rm = T)
            }
            # Average/variance over bin means.
            beta.mean <- mean(beta_ave_bin_means, na.rm = T)
            gamma.mean <- mean(gamma_ave_bin_means, na.rm = T)
            beta.diff <- mean(beta_diff_bin_means, na.rm = T)
            gamma.diff <- mean(gamma_diff_bin_means, na.rm = T)
            
            return(c(mse.asym(beta.mean, beta.diff, gamma.mean, gamma.diff), beta.mean, beta.diff, gamma.mean, gamma.diff))
        }
        
        # This section runs the bootstrapping
        library("boot")
        # For reproducibility, set seed
        set.seed(1234)
        
        # Perform bootsampling.
        boot_test <- boot(data = treeDF_sort, statistic = hier_ave, R = 10000)
        
        # Estimate bootsample mean of asymmetric mse value.
        mse_asym <- mean(boot_test[[2]][,1])
        
        # Estimate upper and lower confidence levels for 95%.
        mse_asym_err_low <- mse_asym - boot.ci(boot_test, type = "perc")[[4]][4]
        mse_asym_err_up <- boot.ci(boot_test, type = "perc")[[4]][5] - mse_asym
        
        # Estimate bootsample means of scale factors too.
        beta_mean <- mean(boot_test[[2]][,2])
        beta_diff <- mean(boot_test[[2]][,3])
        gamma_mean <- mean(boot_test[[2]][,4])
        gamma_diff <- mean(boot_test[[2]][,5])
    }
    
    # return(c(mse.asym(beta.mean, beta.diff, gamma.mean, gamma.diff),beta.mean, beta.diff, gamma.mean, gamma.diff))
    # return(c(mse.asym(beta.mean, beta.diff, gamma.mean, gamma.diff), mse.asym.error(beta.mean, beta.diff, gamma.mean, gamma.diff, beta.mean.stdev, beta.diff.stdev, gamma.mean.stdev, gamma.diff.stdev), beta.mean, beta.diff, gamma.mean, gamma.diff))
    return(c(mse_asym, mse_asym_err_low, mse_asym_err_up, beta_mean, beta_diff, gamma_mean, gamma_diff))
}


mse.tran.plus.error <- function(treeDF, c){
    temp.great <- outlier.filter(treeDF[which(treeDF$generation >= c),], fcol = trait.axes)
    
    beta.mean.great <- single.mean.calc(temp.great[,1])
    beta.diff.great <- single.mean.calc(temp.great[,2])
    gamma.mean.great <- single.mean.calc(temp.great[,3])
    gamma.diff.great <- single.mean.calc(temp.great[,4])
    
    beta.mean.stdev.great <- sqrt(var(log.transform(temp.great[,1])))
    beta.diff.stdev.great <- sqrt(var(log.transform(temp.great[,2])))
    gamma.mean.stdev.great <- sqrt(var(log.transform(temp.great[,3])))
    gamma.diff.stdev.great <- sqrt(var(log.transform(temp.great[,4])))
    
    temp.less <- outlier.filter(treeDF[which(treeDF$generation < c),], fcol = trait.axes)
    
    beta.mean.less <- single.mean.calc(temp.less[,1])
    beta.diff.less <- single.mean.calc(temp.less[,2])
    gamma.mean.less <- single.mean.calc(temp.less[,3])
    gamma.diff.less <- single.mean.calc(temp.less[,4])
    
    beta.mean.stdev.less <- sqrt(var(log.transform(temp.less[,1])))
    beta.diff.stdev.less <- sqrt(var(log.transform(temp.less[,2])))
    gamma.mean.stdev.less <- sqrt(var(log.transform(temp.less[,3])))
    gamma.diff.stdev.less <- sqrt(var(log.transform(temp.less[,4])))
    
    
    return(c(mse.transition(beta.mean.great, beta.diff.great, gamma.mean.great, gamma.diff.great, beta.mean.less, beta.diff.less, gamma.mean.less, gamma.diff.less, c = c),
    mse.tran.error(beta.mean.great, beta.diff.great, gamma.mean.great, gamma.diff.great, beta.mean.less, beta.diff.less, gamma.mean.less, gamma.diff.less, bmgdev = beta.mean.stdev.great, bdgdev = beta.diff.stdev.great, gmgdev = gamma.mean.stdev.great, gdgdev = gamma.diff.stdev.great, bmldev = beta.mean.stdev.less, bdldev = beta.diff.stdev.less, gmldev = gamma.mean.stdev.less, gdldev = gamma.diff.stdev.less, c = c)))
}


######################  outlier_filter_transform.R

log.transform <- function(vec){
    translate <- min(na.omit(vec))
    if(translate <= 0){
        vec <- log10(vec - 2*translate + 10)
    } else
    vec <- log10(vec + 2*translate + 10)
    return(vec)
}

outlier.filter <- function(df, fcol, sigma = 3, method = "log_transform"){
    ## This function performs filtering on the submitted data frame.  In order to maintain versatility of data.frames after having been filtered, the function is structured such that full data frames can be entered and returned.  However, a vector specifying which column index to filter is needed as input to the function.  The number of standard deviations by which we choose to filter is set by the value of sigma, which by default is set to 3.  Note that the names of the vectors no longer mean explicitly what they are named as.  That is, log.beta and beta.out may not refer specifically to beta any more depending on which colums the indeces in fcol refer to.  These are remnants of deprecated usage of the vector names from previous versions of the function.
    if(method == "log_transform"){
        if(length(fcol) == 1){
            log.beta <- log.transform(df[,fcol])
            
            # Find outliers
            beta.out <-  which(log.beta > (mean(log.beta, na.rm = TRUE) + sigma*sd(log.beta, na.rm = TRUE)) | log.beta < (mean(log.beta, na.rm = TRUE) - sigma*sd(log.beta, na.rm = TRUE)))
            
            # Compile outliers
            outliers.vec <- unique(c(beta.out))
            
            # Now redefine df by filtering outliers.
            if(length(outliers.vec > 0)){
                df <- df[-outliers.vec,]
            }
        }
        
        else if(length(fcol) == 2){
            log.beta <- log.transform(df[,fcol[1]])
            log.beta.diff <- log.transform(df[,fcol[2]])
            
            # Find outliers
            beta.out <-  which(log.beta > (mean(log.beta, na.rm = TRUE) + sigma*sd(log.beta, na.rm = TRUE)) | log.beta < (mean(log.beta, na.rm = TRUE) - sigma*sd(log.beta, na.rm = TRUE)))
            beta.diff.out <- which(log.beta.diff > (mean(log.beta.diff, na.rm = TRUE) + sigma*sd(log.beta.diff, na.rm = TRUE)) | log.beta.diff < (mean(log.beta.diff, na.rm = TRUE) - sigma*sd(log.beta.diff, na.rm = TRUE)))
            
            # Compile outliers
            outliers.vec <- unique(c(beta.out, beta.diff.out))
            
            # Now redefine df by filtering outliers.
            if(length(outliers.vec > 0)){
                df <- df[-outliers.vec,]
            }
        }
        
        else if(length(fcol) == 4){
            log.beta <- log.transform(df[,fcol[1]])
            log.beta.diff <- log.transform(df[,fcol[2]])
            log.gamma <- log.transform(df[,fcol[3]])
            log.gamma.diff <- log.transform(df[,fcol[4]])
            
            # Find outliers
            beta.out <-  which(log.beta > (mean(log.beta, na.rm = TRUE) + sigma*sd(log.beta, na.rm = TRUE)) | log.beta < (mean(log.beta, na.rm = TRUE) - sigma*sd(log.beta, na.rm = TRUE)))
            beta.diff.out <- which(log.beta.diff > (mean(log.beta.diff, na.rm = TRUE) + sigma*sd(log.beta.diff, na.rm = TRUE)) | log.beta.diff < (mean(log.beta.diff, na.rm = TRUE) - sigma*sd(log.beta.diff, na.rm = TRUE)))
            gamma.out <- which(log.gamma > (mean(log.gamma, na.rm = TRUE) + sigma*sd(log.gamma, na.rm = TRUE)) | log.gamma < (mean(log.gamma, na.rm = TRUE) - sigma*sd(log.gamma, na.rm = TRUE)))
            gamma.diff.out <- which(log.gamma.diff > (mean(log.gamma.diff, na.rm = TRUE) + sigma*sd(log.gamma.diff, na.rm = TRUE)) | log.gamma.diff < (mean(log.gamma.diff, na.rm = TRUE) - sigma*sd(log.gamma.diff, na.rm = TRUE)))
            
            # Compile outliers
            outliers.vec <- unique(c(beta.out, beta.diff.out, gamma.out, gamma.diff.out))
            
            # Now redefine df by filtering outliers.
            if(length(outliers.vec > 0)){
                df <- df[-outliers.vec,]
            }
        }
        
        else if(length(fcol) == 6){
            log.beta <- log.transform(df[,fcol[1]])
            log.beta.diff <- log.transform(df[,fcol[2]])
            log.gamma <- log.transform(df[,fcol[3]])
            log.gamma.diff <- log.transform(df[,fcol[4]])
            log.col5 <- log.transform(df[,fcol[5]])
            log.col6 <- log.transform(df[,fcol[6]])
            
            # Find outliers
            beta.out <-  which(log.beta > (mean(log.beta) + sigma*sd(log.beta)) | log.beta < (mean(log.beta) - sigma*sd(log.beta)))
            beta.diff.out <- which(log.beta.diff > (mean(log.beta.diff) + sigma*sd(log.beta.diff)) | log.beta.diff < (mean(log.beta.diff) - sigma*sd(log.beta.diff)))
            gamma.out <- which(log.gamma > (mean(log.gamma) + sigma*sd(log.gamma)) | log.gamma < (mean(log.gamma) - sigma*sd(log.gamma)))
            gamma.diff.out <- which(log.gamma.diff > (mean(log.gamma.diff) + sigma*sd(log.gamma.diff)) | log.gamma.diff < (mean(log.gamma.diff) - sigma*sd(log.gamma.diff)))
            col5.out <- which(log.col5 > (mean(log.col5) + sigma*sd(log.col5)) | log.col5 < (mean(log.col5) - sigma*sd(log.col5)))
            col6.out <- which(log.col6 > (mean(log.col6) + sigma*sd(log.col6)) | log.col6 < (mean(log.col6) - sigma*sd(log.col6)))
            
            # Compile outliers
            outliers.vec <- unique(c(beta.out, beta.diff.out, gamma.out, gamma.diff.out, col5.out, col6.out))
            
            # Now redefine df by filtering outliers.
            if(length(outliers.vec > 0)){
                df <- df[-outliers.vec,]
            }
        }
        bad_rows <- outliers.vec
    }
    else if(method == "volume_decrease"){
        bad_rows <- c()
        
        for(i in 1:nrow(df)){
            if(!is.na(df$gamma.diff[i])){
                vol_scale <- (df$beta.ave[i] + df$beta.diff[i])**2*(df$gamma.ave[i] + df$gamma.diff[i]) + (df$beta.ave[i] - df$beta.diff[i])**2*(df$gamma.ave[i] - df$gamma.diff[i])
                if(vol_scale > 1){
                    bad_rows <- c(bad_rows, i)
                }
            }
        }
    }
    else if(method == "radius_length_decrease"){
        bad_rows <- c()
        for(i in 1:nrow(df)){
            if(!is.na(df$gamma.diff[i])){
                # print(i)
                beta.check <- (df$beta.ave[i] + df$beta.diff[i] < 1) & (df$beta.ave[i] - df$beta.diff[i] < 1)
                # print(beta.check)
                gamma.check <- (df$gamma.ave[i] + df$gamma.diff[i] < 1) & (df$gamma.ave[i] - df$gamma.diff[i] < 1)
                # print(gamma.check)
                if(!beta.check | !gamma.check){
                    bad_rows <- c(bad_rows,i)
                }
            }
        }
    }
    else if(method == "unfiltered"){
        bad_rows <- c()
    }
    # Now redefine df by filtering outliers.
    outliers.vec <- bad_rows
    if(length(outliers.vec > 0)){
        df <- df[-outliers.vec,]
    }
    return(df)
}


####################    piecewise_metabolic_scaling_exponent.R

###### Piecewise metabolic scaling function.  Triple check all derivations!!!!!  Still appear to be some inconsistencies with your thetaless2 function.  Also, take note that you have the summation for total volume upper limit wrong in your paper (no big deal), but you need to remember the correct form for moving forward (and for deriving your equations...).

totalvol <- function(x, N){
    return(2**N*(1 - x**(-N-1))/(1-x**(-1)))
}

thetawbe <- function(x, N){
    return(log(2)/(log(2) - log(x)))
}

thetalessapp <- function(x, N){
    return(log(2**N)/(log(2**N) - log(x**N*(1-x))))
}

thetaexact <- function(x, N){
    return(log(2**N)/(log(2**N) + log(1 - x**(N+1)) - log(x**N*(1-x))))
}

thetaexact2 <- function(x, N){
    return(log(2**N)/(log((2**N)*((1 - 1/x**(N+1))/(1 - 1/x)))))
}

thetanear <- function(x, N){
    return(log(2**N)/(log((N+1)*2**N) - N*log(x)))
}

thetagreatapp <- function(x, N){
    return(log(2**N)/(log(2**N) - log(1 - 1/x)))
}

thetaexactgreat <- function(x, N){
    return(log(2**N)/(log(2**N) + log(1 - 1/x**(N+1)) - log(1 - 1/x)))
}

xless <- seq(0.01, 0.999, 0.001)
xnear <- seq(0.999, 1.001, 0.001)
xgreat <- seq(1.001, 5, 0.001)


png(filename = "piecewise_mse_volume_scaling.png", width = 9, height = 7, units = "in", res = 300)

N <- 100

plot.new()
plot.window(xlim = c(0, 5), ylim = c(0, 1), xlab = "", ylab = "")
par("mar" = c(4.5, 5.5, 2.1, 2.1))
box()
par("las" = 1)
axis(1, cex.axis = 1.5)
axis(2, cex.axis = 1.5)
grid()
title(xlab = expression(paste("Volume Scale Factor ")), ylab = expression(paste("Metabolic Scaling Exponent ")), mgp = c(3,1,0), cex.lab = 2)

# , main = "Piecewise defined metabolic scaling exponent \n versus volume scaling for varying generation"
# lines(xless, thetalessapp(xless, N), col = "grey", type = 'l')
lines(xless, thetaexact2(xless, N), col = "red", type = 'l', lwd = 1.5)
# lines(xgreat, thetagreatapp(xgreat, N), col = "green", type = 'l')
lines(xgreat, thetaexact2(xgreat, N), col = "red", type = 'l', lwd = 1.5)
lines(xnear, thetanear(xnear, N), col = "black", type = 'l', lwd = 1.5)

N <- 20

# lines(xless, thetalessapp(xless, N), col = "grey", pch = 2, type = 'l', lty = 2)
lines(xless, thetaexact(xless, N), col = "red",  type = 'l', lty = 5, lwd = 1.5)
# lines(xgreat, thetagreatapp(xgreat, N), col = "green", pch = 2, type = 'l', lty = 2)
lines(xgreat, thetaexactgreat(xgreat, N), col = "red", type = 'l', lty = 5, lwd = 1.5)
lines(xnear, thetanear(xnear, N), col = "black", type = 'l', lty = 5, lwd = 1.5)

N <- 5

# lines(xless, thetalessapp(xless, N), col = "grey", pch = 4, type = 'l', lty = 3)
lines(xless, thetaexact(xless, N), col = "red", type = 'l', lty = 2, lwd = 1.5)
# lines(xgreat, thetagreatapp(xgreat, N), col = "green", pch = 4, type = 'l', lty = 3)
lines(xgreat, thetaexactgreat(xgreat, N), col = "red", type = 'l', lty = 2, lwd = 1.5)
lines(xnear, thetanear(xnear, N), col = "black", type = 'l', lty = 2, lwd = 1.5)

N <- 1

# lines(xless, thetalessapp(xless, N), col = "grey", pch = 4, type = 'l', lty = 4)
lines(xless, thetaexact(xless, N), col = "red", type = 'l', lty = 3, lwd = 1.5)
# lines(xgreat, thetagreatapp(xgreat, N), col = "green", pch = 4, type = 'l', lty = 4)
lines(xgreat, thetaexactgreat(xgreat, N), col = "red", type = 'l', lty = 3, lwd = 1.5)
lines(xnear, thetanear(xnear, N), col = "black", type = 'l', lty = 3, lwd = 1.5)

abline(h = 1)

## Add legend for the line types only, colors can be explained in caption.
legend(x = 1, y = 0.4, legend = c(expression(paste("N >> 1, ", nu < 1)), "N = 100", "N = 20", "N = 5", "N = 1"), lty = c(1,1,5,2,3), col = c("blue", rep("red", 4)), lwd = rep(1.5, 5), cex = 1.5)

lines(xless, thetawbe(xless, N), col = "blue", type = "l", lwd = 1.5)
lines(xgreat, thetawbe(xgreat, N), col = "blue", type = "l", lwd = 1.5)
points(0.5**(4/3)*2, 0.75, col = "black")

dev.off()

## For N = 5, lower fencepost at 0.75, higher fencepost at 1.01 and using higher accurate models is needed for good matching across all x
## For N = 10, lower fencepost at 0.875, higher fencepost at 1.01 and using higher accuacy models is needed for good matching across all x
## For N = 50, lower fencepost at 0.975, higher fencepost at 1.01 seems sufficient
## For N = 100, lower fencepost at 0.99, higher fencepost at 1.005, and seems like we can use thetagreat instead of thetagreat2.

xless
d1less <- diff(x = thetaexact(xless, 20),2)
d1great <- diff(x = thetaexactgreat(xgreat, 20),2)
plot(x = log(c(xless[-c(1:2)], xgreat[-c(1:2)])), y = log(c(d1less, d1great)))
xless[-1]*d1less

#first curve deriv

mid <- c(xless, xgreat)
logvols <- 1/c(log(totalvol(xless, 5)), log(totalvol(xgreat, 5)))
deriv <- function(x, y) y[-1]*diff(y) / diff(x)
middle_pts <- function(x) x[-1] - diff(x) / 2
second_d <- deriv(middle_pts(mid), deriv(mid, logvols))

deriv(mid, thetas)
plot(mid[-1], deriv(mid, logvols))
plot(mid[-c(1:100)], second_d[-c(1:98)])


plot(log(c(xless[-c(1:10)], xgreat)), 1/log(c(totalvol(xless, 10)[-c(1:10)], totalvol(xgreat, 10))))


####################    plotting_raw_diameter_length_with_ML_scores_recorded.R

#### Examining raw radii and length variables.

## Raw Tree tips data length are in cm and diameter are in mm.

## Mouse lung is in mm

## HHT is in mm

## Roots diameters are in centimeters and lengths are in centimeters?

## Balsa is in meters

## Pinon is in meters

## Ponderosa is in meters

########## Using standardized-scaled per species/group, scores are LR = 0.544, and SVM = 0.559 , KDE = 0 p-value ############

########## Using non-standardized but same metric scale per species/group, scores are LR = 0.821, and SVM = 0.88, KDE = 0.002 p-value ############

######## Getting KDE scores too  ##############
library(ks)
library(Amelia)
library(ggbiplot)

## Test non-standardized, p-value is zero
kde.test(x1 = master_raw[mammal_ind,c(1,2)], x2 = master_raw[plant_ind, c(1,2)])

plot(kde.local.test(x1 = log(master_raw[mammal_ind,c(1,2)],10), x2 = log(master_raw[plant_ind, c(1,2)], 10)))


## Test standardized
kde.test(x1 = master_raw_stand[mammal_ind,c(1,2)], x2 = master_raw_stand[plant_ind, c(1,2)])

plot(kde.local.test(x1 = master_raw_stand[mammal_ind,c(1,2)], x2 = master_raw_stand[plant_ind, c(1,2)]))

setwd("/Users/alexwork/odrive/Dropbox/Research/plant_animal_vasculature_comparison/datasets/masters/filtered/")

master_raw <- read.csv(file = "filtered_raw_values_n_2_filtered_rescaled.csv", header= TRUE)
master_raw_stand <- read.csv(file = "filtered_raw_values_n_2_filtered_rescaled_standardized.csv", header = TRUE)[,-1]


## Now we adjust the dimensions for those factors as needed.  do for both standardized and non-standardized

# non-standardized grouping

master_raw$diameter[which(master_raw$group == "roots")] <- master_raw$diameter[which(master_raw$group == "roots")]/100
master_raw$length[which(master_raw$group == "roots")] <- master_raw$length[which(master_raw$group == "roots")]/100

which(master_raw$group == "mml")
master_raw$diameter[which(master_raw$group == "mml")] <- master_raw$diameter[which(master_raw$group == "mml")]/1000
master_raw$length[which(master_raw$group == "mml")] <- master_raw$length[which(master_raw$group == "mml")]/1000

which(master_raw$group == "hht")
master_raw$diameter[which(master_raw$group == "hht")] <- master_raw$diameter[which(master_raw$group == "hht")]/1000
master_raw$length[which(master_raw$group == "hht")] <- master_raw$length[which(master_raw$group == "hht")]/1000

which(master_raw$group == "AS tips")
master_raw$diameter[which(master_raw$group == "AS tips")] <- master_raw$diameter[which(master_raw$group == "AS tips")]/1000
master_raw$length[which(master_raw$group == "AS tips")] <- master_raw$length[which(master_raw$group == "AS tips")]/100

which(master_raw$group == "GS tips")
master_raw$diameter[which(master_raw$group == "GS tips")] <- master_raw$diameter[which(master_raw$group == "GS tips")]/1000
master_raw$length[which(master_raw$group == "GS tips")] <- master_raw$length[which(master_raw$group == "GS tips")]/100

# write.csv(x = master_raw, file = "filtered_raw_values_n_2_filtered_rescaled.csv", row.names = FALSE, col.names = TRUE)

group2 <- mat.or.vec(nrow(master_raw), 1)
group2[which(master_raw$group == "hht")] <- "mammal"
group2[which(master_raw$group == "mml")] <- "mammal"
group2[which(master_raw$group == "balsa")] <- "plant"
group2[which(master_raw$group == "roots")] <- "plant"
group2[which(master_raw$group == "ponderosa")] <- "plant"
group2[which(master_raw$group == "pinon")] <- "plant"
group2[which(master_raw$group == "AS tips")] <- "plant"
group2[which(master_raw$group == "GS tips")] <- "plant"
master_raw <- data.frame(master_raw, "group2" = group2)

# non-standardized grouping

group2 <- mat.or.vec(nrow(master_raw_stand), 1)
group2[which(master_raw_stand$group == "hht")] <- "mammal"
group2[which(master_raw_stand$group == "mml")] <- "mammal"
group2[which(master_raw_stand$group == "balsa")] <- "plant"
group2[which(master_raw_stand$group == "roots")] <- "plant"
group2[which(master_raw_stand$group == "ponderosa")] <- "plant"
group2[which(master_raw_stand$group == "pinon")] <- "plant"
group2[which(master_raw_stand$group == "AS tips")] <- "plant"
group2[which(master_raw_stand$group == "GS tips")] <- "plant"
master_raw_stand <- data.frame(master_raw_stand, "group2" = group2)

## Grab indeces.

hht_ind <- which(master_raw$group == "hht")
ml_ind <- which(master_raw$group == "mml")
balsa_ind <- which(master_raw$group == "balsa")
roots_ind <- which(master_raw$group == "roots")
ponderosa_ind <- which(master_raw$group == "ponderosa")
pinon_ind <- which(master_raw$group == "pinon")
AS_tips_ind <- which(master_raw$group == "AS tips")
GS_tips_ind <- which(master_raw$group == "GS tips")
mammal_ind <- which(master_raw$group2 == "mammal")
plant_ind <- which(master_raw$group2 == "plant")


## Here we plot the non-standardized by mammal/plant grouping .
png(filename = "length_vs_diameter_loglog.png", width = 6, height = 4, units = "in", res = 300)
plot(x = log(master_raw$diameter[plant_ind], base = 10), y = log(master_raw$length[plant_ind], base =10), xlim = range(log(master_raw$diameter, base = 10)), ylim = range(log(master_raw$length, base = 10)), col = rgb(red = 0, green = 0, blue = 0, alpha = 0.25), xlab = expression(paste("Diameters (log-scale) ", log[10](m^3), sep = "")), ylab = expression(paste("Lengths (log-scale) ", log[10](m^3), sep = "")), pch = 1)

points(x = log(master_raw$diameter[mammal_ind], base = 10), y = log(master_raw$length[mammal_ind], base =10), col = rgb(red = 1, green = 0, blue = 0, alpha = 0.25), pch = 2)
legend(x = -3, y = -5, title = "Groups", legend = c("Mammal", "Plant"), col = c("red", "black"), cex = 0.75, pch = c(2, 1))

dev.off()

## Here we plot the standardized by mammal/plant grouping .
png(filename = "length_vs_diameter_standardized.png", width = 6, height = 4, units = "in", res = 300)
plot(x = master_raw_stand$diameter[plant_ind], y = master_raw_stand$length[plant_ind], xlim = range(master_raw_stand$diameter), ylim = range(master_raw_stand$length), col = rgb(red = 0, green = 0, blue = 0, alpha = 0.25), xlab = expression("Diameters (Standardized)"), ylab = expression("Lengths (Standardized)"), pch = 1)

points(x = master_raw_stand$diameter[mammal_ind], y = master_raw_stand$length[mammal_ind], col = rgb(red = 1, green = 0, blue = 0, alpha = 0.25), pch = 2)
legend(x = 5, y = 5, title = "Groups", legend = c("Mammal", "Plant"), col = c("red", "black"), cex = 0.75, pch = c(2, 1))

dev.off()

getwd()


### Here we plot by group.
plot(x = log(master_raw$diameter[ml_ind], 10), y = log(master_raw$length[ml_ind], 10), xlim = range(log(master_raw$diameter, base = 10)), ylim = range(log(master_raw$length, base = 10)), col = "black")

points(x = log(master_raw$diameter[hht_ind], 10), y = log(master_raw$length[hht_ind], 10), col = "red")

points(x = log(master_raw$diameter[balsa_ind], 10), y = log(master_raw$length[balsa_ind], 10), col = "blue")

points(x = log(master_raw$diameter[ponderosa_ind], 10), y = log(master_raw$length[ponderosa_ind], 10), col = "green")

points(x = log(master_raw$diameter[pinon_ind], 10), y = log(master_raw$length[pinon_ind], 10), col = "purple")

points(x = log(master_raw$diameter[roots_ind], 10), y = log(master_raw$length[roots_ind], 10), col = "brown")

points(x = log(master_raw$diameter[GS_tips_ind], 10), y = log(master_raw$length[GS_tips_ind], 10), col = "grey")

points(x = log(master_raw$diameter[AS_tips_ind], 10), y = log(master_raw$length[AS_tips_ind], 10), col = "grey")


######## Here we explore performing a Principle Components Analysis on the data. #########

## Using the same datasets as before, we will be working wiht the prcomp() function, and the tutorial provided online at https://www.datacamp.com/community/tutorials/pca-analysis-r

setwd("/Users/alexwork/odrive/Dropbox/Research/plant_animal_vasculature_comparison/datasets/masters/")

## Read in data tables.

balsa <- read.csv("balsa_master.csv", header = T)[,-1]
balsa$nodeid <- as.character(balsa$nodeid)
balsa$parent <- as.character(balsa$parent)
balsa <- data.frame(balsa[,c(5:12)], "group" = rep("Balsa", nrow(balsa)), "class" = rep("Plant", nrow(balsa)))

hht <- read.csv("hht_master.csv", header = T)[,-1]
hht$nodeid <- as.character(hht$nodeid)
hht$parent <- as.character(hht$parent)
hht <- data.frame(hht[,c(7,6,8:13)], "group" = rep("HHT", nrow(hht)), "class" = rep("Mammal", nrow(hht)))


ml <- read.csv("mouselung_master.csv", header = T)[,-1]
ml$nodeid <- as.character(ml$nodeid)
ml$parent <- as.character(ml$parent)
ml <- data.frame(ml[,c(5:12)], "group" = rep("ML", nrow(ml)), "class" = rep("Mammal", nrow(ml)))


pinon <- read.csv("pinon_master.csv", header = T)[,-1]
pinon <- data.frame(pinon[,c(5:12)], "group" = rep("Pinon", nrow(pinon)), "class" = rep("Plant", nrow(pinon)))

pond <- read.csv("ponderosa_master.csv", header = T)[,-1]
pond <- data.frame(pond[,c(7, 6, 8:13)], "group" = rep("Pond", nrow(pond)), "class" = rep("Plant", nrow(pond)))

root <- read.csv("root_master.csv", header = T)[,-1]
root$indv <- as.factor(root$indv)
root <- root[-c(165:167, 220:225, 1029:1031),]
root <- data.frame(root[,c(7, 6, 13:18)], "group" = rep("Root", nrow(root)), "class" = rep("Plant", nrow(root)))

treetips <- read.csv("treetips_master.csv", header = T)[,-1]
treetips$parent <- as.character(treetips$parent)
astips <- which(treetips$class == "AS")
tips_group <- c(rep("GS Tips", nrow(treetips)))
tips_group[astips] <- "AS Tips"
treetips <- data.frame(treetips[,c(8:15)], "group" = tips_group, "class" = rep("Plant", nrow(treetips)))

## Put on same metric scale, although by standardizing this step is likely moot.

root$diameter <- root$diameter/100
root$length <- root$length/100

ml$diameter <- ml$diameter/1000
ml$length <- ml$length/1000

hht$diameter <- hht$diameter/1000
hht$length <- hht$length/1000

treetips$diameter <- treetips$diameter/1000
treetips$length <- treetips$length/100

#### Experimenting with dealing with missing values.  Using a Joint Modeling approach as described in Dray, Stéphane, and Julie Josse. "Principal component analysis with missing values: a comparative survey of methods." Plant Ecology 216.5 (2015): 657-667.  To do so, we are using the amelia package as described in Honaker J, King G, Blackwell M (2011) Amelia II: a program for missing data. J Stat Softw 45(7):1–47

imputation_averager <- function(treeDF, imputation_count, columns){
    ## This function performs imputations and averages the outputs and returns the final treeDF.
    ameliaDF <- treeDF[,columns]
    ameliaDF_amelia <- amelia(x = ameliaDF, m = imputation_count, p2s = 0, logs = c(7,8))
    for(j in 1:nrow(ameliaDF)){
        for(k in 1:ncol(ameliaDF)){
            imputation_values <- mat.or.vec(1, imputation_count)
            for(i in 1:imputation_count){
                imputation_values[i] <- ameliaDF_amelia$imputations[[i]][j,k]
            }
            ameliaDF[j,k] <- mean(imputation_values)
        }
    }
    returnDF <- data.frame(ameliaDF[, c(1:8)], treeDF[, c(9:10)])
    return(returnDF)
}

hht_amelia <- imputation_averager(hht, 5, c(1:8))
ml_amelia <- imputation_averager(ml, 5, c(1:8))
balsa_amelia <- imputation_averager(balsa, 5, c(1:8))
pinon_amelia <- imputation_averager(pinon, 5, c(1:8))
pond_amelia <- imputation_averager(pond, 5, c(1:8))
treetips_amelia <- imputation_averager(treetips, 5, c(1:8))
root_amelia <- imputation_averager(root, 5, c(1:8))


### Now merge all dataframes into one master dataframe with columns for species, groups.

master_PCA_amelia <- rbind(hht_amelia, ml_amelia, pinon_amelia, pond_amelia, root_amelia, treetips_amelia, balsa_amelia)

# Results of pca with imputated values has unclear results.  Consider just using asymmetric scale factors and speak to imputation limitation and reference papers.  You have Non-random empty values, but structure is not obvious for imputation methods.
scale_factor_pca <- prcomp(master_PCA_amelia[, c(3:8)], center = TRUE, scale. = TRUE)
ggbiplot(scale_factor_pca, choices = c(1,2))


## Here we focus just on asymmetric scale factors.
master_PCA <- rbind(hht, ml, pinon, pond, root, treetips, balsa)

scale_factor_pca <- prcomp(na.omit(master_PCA[, c(5:8)]), center = TRUE, scale. = TRUE)
g_12 <- ggbiplot(scale_factor_pca, ellipse = TRUE, groups = na.omit(master_PCA[, c(5:10)])$class, alpha = 0.5, choices = c(3,4), scale = 1, var.scale = 1)

g_12$layers <- c(g_12$layers, g_12$layers[[1]])
g_12$layers
g_12 + xlim(-5, 2) + ylim(-3, 5)


###### Pretty plotting of results ######
# Do PCA
PCA <- prcomp(na.omit(master_PCA[, c(5:8)]), center = TRUE, scale. = TRUE)

# Extract PC axes
PCAvalues <- data.frame(Groups = na.omit(master_PCA[, c(5:10)])$class, PCA$x)

# Extract loadings of the variables
PCAloadings <- data.frame(Variables = rownames(PCA$rotation), PCA$rotation)

# Calculate the angles and the label offset for first two PCs
PCAloadings$Angle = ((180/pi) * atan(PCAloadings$PC2/PCAloadings$PC1))
PCAloadings$Offset <- ((-2 * sign(PCAloadings$PC1))/2)

png(filename = "PCA_12_mammal_plant_asymscalefactors.png", width = 4, height = 4, units = "in", res = 300)
# Plot for first two pcs
ggplot(PCAvalues, aes(x = PC1, y = PC2, colour = Groups)) +
stat_ellipse(level = 0.95, size = 2, show.legend = FALSE) +
geom_point(size = 1, alpha = 0.5) +
geom_segment(data = PCAloadings, aes(x = 0, y = 0, xend = (PC1), yend = (PC2)),
arrow = arrow(length = unit(1/2, "picas")), color = "black") +
geom_text(data = PCAloadings, aes(x = (PC1), y = (PC2)),
label = c(expression(bar(beta)), expression(paste(Delta, beta)), expression(bar(gamma)), expression(paste(Delta, gamma))),
color = "black", size = 4, angle = 0, hjust = c(1, 1, 1, 1), vjust = c(0, 0, -0.75, +1)) +
theme_classic() +
theme(legend.justification = c(1,1), legend.position = c(1,1)) +
coord_cartesian(xlim = c(-2, 2), ylim = c(-2, 2))+
labs(x = "Standardized PC1 (48.4% explained var.)", y = "Standardized PC2 (26.8% expalined var.)")
dev.off()

# Calculate the angles and the label offset for second two PCs
PCAloadings$Angle = ((180/pi) * atan(PCAloadings$PC4/PCAloadings$PC3))
PCAloadings$Offset <- ((-2 * sign(PCAloadings$PC3))/2)

# Plot for second two pcs
png(filename = "PCA_34_mammal_plant_asymscalefactors.png", width = 4, height = 4, units = "in", res = 300)
ggplot(PCAvalues, aes(x = PC3, y = PC4, colour = Groups)) +
stat_ellipse(level = 0.95, size = 2, show.legend = FALSE) +
geom_point(size = 1, alpha = 0.5) +
geom_segment(data = PCAloadings, aes(x = 0, y = 0, xend = (PC3), yend = (PC4)),
arrow = arrow(length = unit(1/2, "picas")), color = "black") +
geom_text(data = PCAloadings, aes(x = (PC3), y = (PC4)),
label = c(expression(bar(beta)), expression(paste(Delta, beta)), expression(bar(gamma)), expression(paste(Delta, gamma))),
color = "black", size = 4, angle = 0, hjust = c(-0.5, 1.25, 0.5, 0.75), vjust = c(0.5, 0.5, -0.5, 1.25)) +
theme_classic() +
theme(legend.position = "none")+
coord_cartesian(xlim = c(-2, 2), ylim = c(-2, 2))+
labs(x = "Standardized PC3 (18.8% explained var.)", y = "Standardized PC4 (6.0% expalined var.)")
dev.off()


####################    regression_scaling_script.R

## This code calculates metabolic scaling exponent from the regression based approach involving the scaling of number of distal tips/branches vs. total volume.

## Need to add three columns to each file except.  One for distal tips (see NCounter code).  One for branch volume.  One for total distal volume.


############## Set working directories and import necessary data files. #####
setwd("/Users/alexwork/odrive/Dropbox/Research/plant_animal_vasculature_comparison/datasets/bentley_balsa_pinon_pond_edited/balsa")

balsa <- read.csv("balsa_edited.csv", header = T)
balsa$nodeid <- as.character(balsa$nodeid)
balsa$parent <- as.character(balsa$parent)

setwd("/Users/alexwork/odrive/Dropbox/Research/plant_animal_vasculature_comparison/datasets/bentley_balsa_pinon_pond_edited/alt_pinon")

pinon <- read.csv("pinon_edited.csv", header = T)[,-1]

setwd("/Users/alexwork/odrive/Dropbox/Research/plant_animal_vasculature_comparison/datasets/bentley_balsa_pinon_pond_edited/ponderosa")

pond03 <- read.csv("pond03_edited.csv", header = T)
pond05 <- read.csv("pond05_edited.csv", header = T)
pond06 <- read.csv("pond06_edited.csv", header = T)
pond07 <- read.csv("pond07_edited.csv", header = T)
pond16 <- read.csv("pond16_edited.csv", header = T)

setwd("/Users/alexwork/odrive/Dropbox/Research/plant_animal_vasculature_comparison/datasets/gray_tree_tips/processed/master_data_frames")

treetips <- read.csv("masterDF_scale_factor.csv", header = T)[,-c(1,2)]
treetips$parent <- as.character(treetips$parent)
treetips$length <- treetips$length/100
treetips$diameter <- treetips$diameter/100

setwd("/Users/alexwork/odrive/Dropbox/Research/plant_animal_vasculature_comparison/datasets/tekin_ml_hht/hht")

hht01 <- read.csv("hht01.csv", header = T)[,-1]
hht02 <- read.csv("hht02.csv", header = T)[,-1]
hht03 <- read.csv("hht03.csv", header = T)[,-1]
hht04 <- read.csv("hht04.csv", header = T)[,-1]
hht05 <- read.csv("hht05.csv", header = T)[,-1]
hht06 <- read.csv("hht06.csv", header = T)[,-1]
hht07 <- read.csv("hht07.csv", header = T)[,-1]
hht08 <- read.csv("hht08.csv", header = T)[,-1]
hht09 <- read.csv("hht09.csv", header = T)[,-1]
hht10 <- read.csv("hht10.csv", header = T)[,-1]
hht11 <- read.csv("hht11.csv", header = T)[,-1]
hht12 <- read.csv("hht12.csv", header = T)[,-1]
hht13 <- read.csv("hht13.csv", header = T)[,-1]
hht14 <- read.csv("hht14.csv", header = T)[,-1]
hht15 <- read.csv("hht15.csv", header = T)[,-1]
hht16 <- read.csv("hht16.csv", header = T)[,-1]
hht17 <- read.csv("hht17.csv", header = T)[,-1]
hht18 <- read.csv("hht18.csv", header = T)[,-1]

setwd("/Users/alexwork/odrive/Dropbox/Research/plant_animal_vasculature_comparison/datasets/tekin_ml_hht/mouselung")

ml <- read.csv("ml.csv", header = T)[,-1]
ml_alk1 <- read.csv("ALK1_t0.970.csv", header = T)[,-1]
ml_mgp <- read.csv("MGP_t0.900.csv", header = T)[,-1]

########## Define functions #######

source("/Users/alexwork/odrive/Dropbox/Research/UA/GRRRangerism_online/asymmetric_modelling/R_functions/get.nodal.ratios.R")
source("/Users/alexwork/odrive/Dropbox/Research/plant_animal_vasculature_comparison/R_code/synthesized/functions/outlier_filter_transform.R")

single.mean.calc <- function(vec){
    ## This subroutine is used to translate and transform data, calculate a mean value, thne transform and translate back the mean.
    translate <- min(vec)
    if(translate <= 0){
        vec <- vec - 2*translate + 10
        vec.ave <- 10^(mean(log10(vec))) - 10 + 2*translate
        return(vec.ave)
    } else if(translate > 0){
        vec.ave <- 10^(mean(log10(vec)))
        return(vec.ave)
    }
}

## Here we have a function for calculating the volume of every branch.

vol_calc_fun <- function(treeDF){
    diameter <- treeDF$diameter
    length <- treeDF$length
    vol <- mat.or.vec(length(diameter), 1)
    for(i in 1:length(vol)){
        vol[i] <- pi*0.25*diameter[i]*diameter[i]*length[i]
    }
    return(data.frame(treeDF, "vol" = vol))
}

## Here we have a function for calculating the total volume distal to a given branch.

distal_vol_fun <- function(treeDF){
    ## Initialize distal_vol vector and insert into treeDF
    distal_vol <- mat.or.vec(length(treeDF$n),1)
    treeDF <- data.frame(treeDF, "distal_vol" = distal_vol)
    ## Identify tips.
    if(length(which(is.na(treeDF$n))) > 0){
        tips <- which(is.na(treeDF$n))
    } else if(length(which(is.na(treeDF$n))) == 0){
        tips <- which(treeDF$n == 0)
    }
    ## Seed tips with their branch volume.
    treeDF$distal_vol[tips] <- treeDF$vol[tips]
    while(treeDF$distal_vol[1] == 0){
        new_tips <- c()
        for(i in tips){
            sibs <- which(treeDF$parent == treeDF$parent[i])
            parent <- which(treeDF$nodeid == treeDF$parent[i])
            if((treeDF$distal_vol[parent] == 0) & (min(treeDF$distal_vol[sibs]) > 0)){
                treeDF$distal_vol[parent] <- sum(treeDF$vol[parent], treeDF$distal_vol[sibs])
                new_tips <- c(new_tips, parent)
            } else if(min(treeDF$distal_vol[sibs]) == 0){
                new_tips <- c(new_tips, i)
            }
        }
        tips <- new_tips
    }
    return(treeDF)
}

## Here we have a function for counting the number of branches distal to a given branch.

distal_tip_fun <- function(treeDF){
    ## Intialize distal_tips vector and insert into treeDF.
    distal_tips <- mat.or.vec(length(treeDF$n),1)
    treeDF <- data.frame(treeDF, "distal_tips" = distal_tips)
    ## Identify tips.
    if(length(which(is.na(treeDF$n))) > 0){
        tips <- which(is.na(treeDF$n))
    } else if(length(which(is.na(treeDF$n))) == 0){
        tips <- which(treeDF$n == 0)
    }
    ## Seed tips as having distal_tip values of 1
    treeDF$distal_tips[tips] <- 1
    while(treeDF$distal_tips[1] == 0){
        new_tips <- c()
        for(i in tips){
            sibs <- which(treeDF$parent == treeDF$parent[i])
            parent <- which(treeDF$nodeid == treeDF$parent[i])
            if((treeDF$distal_tips[parent] == 0) & (min(treeDF$distal_tips[sibs]) > 0)){
                treeDF$distal_tips[parent] <- sum(treeDF$distal_tips[sibs])
                new_tips <- c(new_tips, parent)
            } else if(min(treeDF$distal_tips[sibs]) == 0){
                new_tips <- c(new_tips, i)
            }
        }
        tips <- new_tips
    }
    treeDF$distal_tips[which(is.na(treeDF$n))] <- 0
    treeDF$distal_tips[which(treeDF$n == 0)] <- 0
    return(treeDF)
}

reg_plot_out <- function(treeDF, tree_name){
    ## This function automatically plots log transformed data of tips versus volume for vascular trees.  The plot will show a linear regression and display the slope, 95% confidence interval, and R squared value.  Finally, these three values returned for later use.
    
    log_tips <- log(treeDF[which(treeDF$distal_tips > 1),]$distal_tips)
    log_vol <- log(treeDF[which(treeDF$distal_tips > 1),]$distal_vol)
    treeDF_lm <- lm(log_tips~log_vol)
    
    rsq <- summary(treeDF_lm)$r.squared
    slp <- treeDF_lm$coefficients[[2]]
    ci <- summary(treeDF_lm)$coefficients[2,2]
    
    rp = vector('expression', 3)
    rp[1] = substitute(expression(theta == SLP),
    list(SLP = format(slp, dig = 3)))[2]
    rp[2] = substitute(expression('95%' == CI),
    list(CI = format(ci, dig = 3)))[2]
    rp[3] = substitute(expression(italic(R)^2 == RSQ),
    list(RSQ = format(rsq, dig = 3)))[2]
    
    ## Comment the call to png() and dev.off() to plot in RStudio.  Otherwise, check your directory is appropriate.
    png(filename = paste(tree_name, "_vol_tip_scale.png", sep = ""), width = 6, height = 4, units = "in", res = 300)
    plot(log_vol, log_tips, main = tree_name)
    abline(treeDF_lm, col = "red")
    legend("topleft", legend = rp, bty = "n")
    dev.off()
    return(c(slp, ci, rsq))
}

reg_plot_out_sma_plot <- function(treeDF, tree_name){
    ## This function automatically plots log transformed data of tips versus volume for vascular trees.  The plot will show a linear regression, computed by Standard Major Axis regression, and display the slope, 97.5% confidence interval, and R squared value.  Finally, these three values returned for later use.
    library("lmodel2")
    
    log_tips <- log(treeDF[which(treeDF$distal_tips > 1),]$distal_tips)
    log_vol <- log(treeDF[which(treeDF$distal_tips > 1),]$distal_vol)
    tryCatch({
        
        treeDF_lm <- lmodel2(log_tips~log_vol)
        
        rsq <- treeDF_lm$rsquare
        slp <- treeDF_lm$regression.results[3,3]
        ci <- treeDF_lm$confidence.intervals[3,5] - treeDF_lm$confidence.intervals[3,4]
        int <- treeDF_lm$regression.results[3,2]
        
        rp = vector('expression', 3)
        rp[1] = substitute(expression(theta == SLP),
        list(SLP = format(slp, dig = 3)))[2]
        rp[2] = substitute(expression('95%' == CI),
        list(CI = format(ci, dig = 3)))[2]
        rp[3] = substitute(expression(italic(R)^2 == RSQ),
        list(RSQ = format(rsq, dig = 3)))[2]
        
        ## Comment the call to png() and dev.off() to plot in RStudio.  Otherwise, check your directory is appropriate.
        png(filename = paste(tree_name, "_vol_tip_scale.png", sep = ""), width = 6, height = 4, units = "in", res = 300)
        plot(log_vol, log_tips, main = NULL, xlab = "", ylab = "")
        title(xlab= expression(paste("Distal volume (log-scale)", " ", ln(mm^3))), ylab = expression(paste("Distal terminal tips (log-scale)")), mgp = c(2.25, 1, 0))
        abline(a = int, b = slp, col = "red")
        legend("topleft", legend = rp, bty = "n")
        dev.off()
        
        return(c(slp, ci, rsq))
    }, error = function(err) {
        
        print(paste("Error occurred, returning NA's", err))
        rsq <- NA
        slp <- NA
        ci <- NA
        int <- NA
        return(c(slp, ci, rsq))
    })
}


reg_plot_out_sma_boot <- function(treeDF, indices){
    ## This function automatically plots log transformed data of tips versus volume for vascular trees.  The plot will show a linear regression, computed by Standard Major Axis regression, and display the slope, 95% confidence interval, and R squared value.  Finally, these three values returned for later use.
    library("lmodel2")
    
    treeDF <- treeDF[indices,]
    
    log_tips <- log(treeDF[which(treeDF$distal_tips > 1),]$distal_tips)
    log_vol <- log(treeDF[which(treeDF$distal_tips > 1),]$distal_vol)
    tryCatch({
        
        treeDF_lm <- lmodel2(log_tips~log_vol)
        
        rsq <- treeDF_lm$rsquare
        slp <- treeDF_lm$regression.results[3,3]
        ci <- treeDF_lm$confidence.intervals[3,5] - treeDF_lm$confidence.intervals[3,4]
        int <- treeDF_lm$regression.results[3,2]
        
        # rp = vector('expression', 3)
        # rp[1] = substitute(expression(theta == SLP),
        #                    list(SLP = format(slp, dig = 3)))[2]
        # rp[2] = substitute(expression('97.5%' == CI),
        #                    list(CI = format(ci, dig = 3)))[2]
        # rp[3] = substitute(expression(italic(R)^2 == RSQ),
        #                    list(RSQ = format(rsq, dig = 3)))[2]
        #
        # # ## Comment the call to png() and dev.off() to plot in RStudio.  Otherwise, check your directory is appropriate.
        # png(filename = paste(tree_name, "_vol_tip_scale.png", sep = ""), width = 6, height = 4, units = "in", res = 300)
        # plot(log_vol, log_tips, main = tree_name)
        # abline(a = int, b = slp, col = "red")
        # legend("topleft", legend = rp, bty = "n")
        # dev.off()
        
        return(c(slp, ci, rsq))
    }, error = function(err) {
        
        print(paste("Error occurred, returning NA's", err))
        rsq <- NA
        slp <- NA
        ci <- NA
        int <- NA
        return(c(slp, ci, rsq))
    })
}

boot_test <- boot(data = treeDF, statistic = reg_plot_out_sma_boot, R = 2000)


asym_measure <- function(treeDF){
    ## This function calculates a gross metric for global asymmetry that can be used to characterize networks and rank them.
    delta <- mat.or.vec(length(treeDF$beta.ave), 1)
    for(i in 1:length(delta)){
        delta[i] <- sqrt((treeDF$beta.diff[i]/treeDF$beta.ave[i])**2 + (treeDF$gamma.diff[i]/treeDF$gamma.ave[i])**2)
    }
    return(data.frame(treeDF, "delta" = delta))
}

####### Start peforming distal calcs #######


mammals <- list(hht01, hht02, hht03, hht04, hht05, hht06, hht07, hht08, hht09, hht10, hht11, hht12, hht13, hht14, hht15, hht16, hht17, hht18, ml, ml_alk1, ml_mgp)

mammal_names <- c(rep("hht", 18), "mouse lung WT", "mouse lung alk1", "mouse lung mgp")
mammal_id <- c(1:18, 1, 1, 1)

trees <- list(balsa, pinon, pond03, pond05, pond06, pond07, pond16)
tree_names <- c("balsa", "pinon", rep("ponderosa", 5))
tree_id <- c(1, 1, 3, 5, 6, 7, 16)

for(i in 1:length(mammals)){
    names(mammals[[i]])[1] <- "nodeid"
    names(mammals[[i]])[12] <- "n"
    names(mammals[[i]])[2] <- "length"
    names(mammals[[i]])[4] <- "diameter"
    mammals[[i]]$n[which(mammals[[i]]$n == 0)] <- NA
    mammals[[i]]$nodeid <- as.character(mammals[[i]]$nodeid)
    mammals[[i]]$parent <- as.character(mammals[[i]]$parent)
    mammals[[i]] <- mammals[[i]][,-8]
}

for(i in 1:length(mammals)){
    mammals[[i]] <- distal_vol_fun(mammals[[i]])
    mammals[[i]] <- distal_tip_fun(mammals[[i]])
    mammals[[i]] <- get.nodal.ratios(mammals[[i]])
    mammals[[i]] <- asym_measure(outlier.filter(mammals[[i]], c("beta.ave", "beta.diff", "gamma.ave", "gamma.diff")))
}

for(i in 1:length(trees)){
    trees[[i]] <- vol_calc_fun(trees[[i]])
}

for(i in 1:length(trees)){
    trees[[i]] <- distal_tip_fun(trees[[i]])
    trees[[i]] <- distal_vol_fun(trees[[i]])
    trees[[i]] <- get.nodal.ratios(trees[[i]])
    trees[[i]] <- asym_measure(outlier.filter(trees[[i]], c("beta.ave", "beta.diff", "gamma.ave", "gamma.diff")))
}

treetips <- vol_calc_fun(treetips)
newtreetip <- data.frame()

for(i in levels(treetips$id)){
    temptreetip <- distal_tip_fun(treetips[which(treetips$id == i),])
    temptreetip <- distal_vol_fun(temptreetip)
    temptreetip <- asym_measure(outlier.filter(temptreetip, c("beta.ave", "beta.diff", "gamma.ave", "gamma.diff")))
    newtreetip <- rbind(newtreetip, temptreetip)
}
treetips <- newtreetip
rm(newtreetip, temptreetip)

####### Begin performing regressions and building output table #######

tips_vol_tab <- mat.or.vec(0, 6)
colnames(tips_vol_tab) <- c("Species", "ID", "Slope", "CI", "R Sq.", "Delta")

####### Alternate method where we are merging individuals of a common species together.  Comment out to toggle off also see commented line in loop for treetips.
hht <- data.frame()
for(i in 1:18){
    hht <- rbind(hht, mammals[[i]])
}
for(i in 1:18){
    mammals[[i]] <- hht
}

pond <- data.frame()
for(i in 3:7){
    pond <- rbind(pond, trees[[i]])
}
for(i in 3:7){
    trees[[i]] <- pond
}


## Comment the call to setwd() if not printing graphs to file.
setwd("/Users/alexwork/odrive/Dropbox/Research/plant_animal_vasculature_comparison/plots/volume_vs_tip_scaling/merge_test/mammals/")

for(i in 1:length(mammals)){
    tab_row <- c(mammal_names[i], mammal_id[i], reg_plot_out_sma(treeDF = mammals[[i]], tree_name = paste(mammal_names[i], mammal_id[i], sep = " ")), single.mean.calc(na.omit(mammals[[i]]$delta)))
    tips_vol_tab <- rbind(tips_vol_tab, tab_row)
}

## Comment the call to setwd() if not printing graphs to file.
setwd("/Users/alexwork/odrive/Dropbox/Research/plant_animal_vasculature_comparison/plots/volume_vs_tip_scaling/merge_test/plants/")

for(i in 1:length(trees)){
    tab_row <- c(tree_names[i], tree_id[i], reg_plot_out_sma(treeDF = trees[[i]], tree_name = paste(tree_names[i], tree_id[i], sep = " ")), single.mean.calc(na.omit(trees[[i]]$delta)))
    tips_vol_tab <- rbind(tips_vol_tab, tab_row)
}

for(i in 1:length(levels(treetips$id))){
    spcs <- paste(unique(treetips$spcs[which(treetips$id == levels(treetips$id)[i])]))
    id <- levels(treetips$id)[i]
    plot_name <- paste(spcs, id, sep = " ")
    # tab_row <- c(spcs, id, reg_plot_out_sma(treeDF = treetips[which(treetips$id == levels(treetips$id)[i]),], tree_name = plot_name), single.mean.calc(na.omit(treetips[which(treetips$id == levels(treetips$id)[i]),]$delta)))
    tab_row <- c(spcs, id, reg_plot_out_sma(treeDF = treetips[which(treetips$spcs == spcs),], tree_name = plot_name), single.mean.calc(na.omit(treetips[which(treetips$id == levels(treetips$id)[i]),]$delta)))
    tips_vol_tab <- rbind(tips_vol_tab, tab_row)
}

# setwd("/Users/alexwork/Desktop")
# reg_plot_out_sma(treeDF = mammals[[19]], tree_name = mammal_names[19])
# boot_test <- boot(data = mammals[[19]], statistic = reg_plot_out_sma_boot, R = 1000)
# plot(boot_test)
# mean(boot_test$t[,1])


write.csv(tips_vol_tab, file = file.path("/Users/alexwork/odrive/Dropbox/Research/plant_animal_vasculature_comparison/tables/merge_test/volume_tip_scaling.csv"))


################### single.mean.calc <- function(vec){
## This subroutine is used to translate and transform data, calculate a mean value, thne transform and translate back the mean.
vec <- na.omit(vec)
translate <- min(vec)
if(translate <= 0){
    vec <- vec - 2*translate + 10
    vec.ave <- 10^(mean(log10(vec))) - 10 + 2*translate
    return(vec.ave)
} else if(translate > 0){
    vec.ave <- 10^(mean(log10(vec)))
    return(vec.ave)
}
}


s####################   table_texing_mammal_plant.R

## This script calculates the sign of the metabolic versus mass curvature as per the most recent draft of the plant animal comparison paper.  Needed is the mse_funcmean_geom_tab table from the empiricle_mse_heatmaps_groups.R script.


curvature_check_1 <- function(beta.ave, beta.diff, gamma.ave, gamma.diff){
    return(-(gamma.ave*beta.diff**2 + 2*beta.ave*beta.diff*gamma.diff))
}

curvature_check_2 <- function(nu, N){
    return((nu/N**2)*(1 - (N+1)**2*nu**(-N) + 2*N*(N+2)*nu**(-N-1) - (N+1)**2*nu**(-N-2) + nu**(-2*N-2))/(nu - nu**(-N) + nu**(-N-1) - 1)**2)
}

curvature <- mat.or.vec(nrow(mse_funcmean_geom_tab), 1)

## Run this block for curvature_check_1
for(i in 1:nrow(mse_funcmean_geom_tab)){
    beta.ave <- mse_funcmean_geom_tab$beta_ave[i]
    beta.diff <- mse_funcmean_geom_tab$beta_diff[i]
    gamma.ave <- mse_funcmean_geom_tab$gamma_ave[i]
    gamma.diff <- mse_funcmean_geom_tab$gamma_diff[i]
    if(curvature_check_1(beta.ave, beta.diff, gamma.ave, gamma.diff)>0){
        curvature[i] <- "positive"
    }else{
        curvature[i] <- "negative"
    }
    print(c(i, print(curvature_check_1(beta.ave, beta.diff, gamma.ave, gamma.diff)), curvature[i], as.character(mse_funcmean_geom_tab$group[i])))
}

## Run this block for curvature_check_2
for(i in 1:nrow(mse_funcmean_geom_tab)){
    nu <- mse_funcmean_geom_tab$asym_vol_fac[i]
    N <- mse_funcmean_geom_tab$N[i]
    if(curvature_check_2(nu = nu, N = N)>0){
        curvature[i] <- "positive"
    }else{
        curvature[i] <- "negative"
    }
    print(c(i, nu, curvature_check_2(nu = nu, N = N), curvature[i], as.character(mse_funcmean_geom_tab$group[i])))
}

mse_funcmean_geom_tab <- data.frame(mse_funcmean_geom_tab, "curvature" = curvature)

length(which(mse_funcmean_geom_tab$curvature == "positive" & mse_funcmean_geom_tab$group == "mammal"))
length(which(mse_funcmean_geom_tab$group == "mammal"))

length(which(mse_funcmean_geom_tab$curvature == "positive" & mse_funcmean_geom_tab$group == "angiosperm"))
length(which(mse_funcmean_geom_tab$group == "angiosperm"))

length(which(mse_funcmean_geom_tab$curvature == "positive" & mse_funcmean_geom_tab$group == "gymnosperm"))
length(which(mse_funcmean_geom_tab$group == "gymnosperm"))


## mammals have 2/19 with positive curvature, 17/19 with negative curvature

## angiosperms have 5/17 with positive curvature, 12/17 with negative curvature
## gymnosperms have 14/22 with positive curvature, 8/22 with negative curvature.

geo_sum_1 <- function(x, start = 0, end = N){
    sum <- 0
    for(i in start:end){
        sum <- sum + x**(-i)
    }
    return(sum)
}

geo_sum_2 <- function(x, start = 0, end = N){
    sum <- 0
    for(i in start:end){
        sum <- sum + i*x**(-i)
    }
    return(sum)
}

geo_sum_3 <- function(x, start = 0, end = N){
    sum <- 0
    for(i in start:end){
        sum <- sum + i**2*x**(-i)
    }
    return(sum)
}

curvature_check_3 <- function(x, N){
    return((geo_sum_1(x = x, start = 0, end = N)*geo_sum_3(x = x, start = 2, end = N) - (geo_sum_2(x = x, start = 1, end = N))**2)/(N**2*geo_sum_1(x = x, start = 0, end = N)**2))
}

x <- seq(from  = 0.01, to = 5, by = 0.01)
y <- curvature_check_3(x = x, N = 10)

plot(x = x, y = y)
abline(v = 1)

curvature_check_3(5, 1)
